# Supplementary material for: Peptidic boronic acid Plasmodium falciparum SUB1 inhibitors with improved selectivity over human proteasome
Source: PubMed Central journal article supplement (PMC7616463; doi:10.1021/acs.jmedchem.4c01005), 2024-07-25
Supplement: EMS198616-supplement-Supporting_Information.pdf [file EMS198616-supplement-Supporting_Information.pdf]

## Supporting Information

### Peptidic boronic acid *Plasmodium falciparum* SUB1 inhibitors with improved selectivity over human proteasome

Chrislaine Withers-Martinez,<sup>§a</sup> Elina Lidumniece,<sup>§b</sup> Fiona Hackett,<sup>a</sup> Christine R Collins,<sup>a</sup> Zahie Taha,<sup>a</sup> Michael J. Blackman,<sup>\*a,c</sup> and Aigars Jirgensons<sup>\*b</sup>

<sup>a</sup>Malaria Biochemistry Laboratory, The Francis Crick Institute, London NW1 1AT, United Kingdom;

<sup>b</sup>Latvian Institute of Organic Synthesis, Riga LV-1006, Latvia;

<sup>c</sup>Faculty of Infectious and Tropical Diseases, London School of Hygiene & Tropical Medicine, London WC1E 7HT, United Kingdom;

<sup>§</sup>These authors contributed equally

### Content

|                                                                                                           |     |
|-----------------------------------------------------------------------------------------------------------|-----|
| 1. Effect of human proteasome inhibitors on activity of recombinant PfSUB1 .....                          | S2  |
| 2. 20S Human Proteasome dose response assay for peptidic boronic acid SUB1 inhibitors .....               | S2  |
| 3. Docking of bortezomib and inhibitors <b>1a</b> , <b>3b</b> , <b>1c</b> and <b>4c</b> into PfSUB1 ..... | S3  |
| 4. Compound <b>2a–h</b> , <b>3a–j</b> , <b>4a–c</b> characterization spectra .....                        | S4  |
| 5. Representative examples of HPLC purity .....                                                           | S46 |

## 1. Effect of human proteasome inhibitors on activity of recombinant PfSUB1

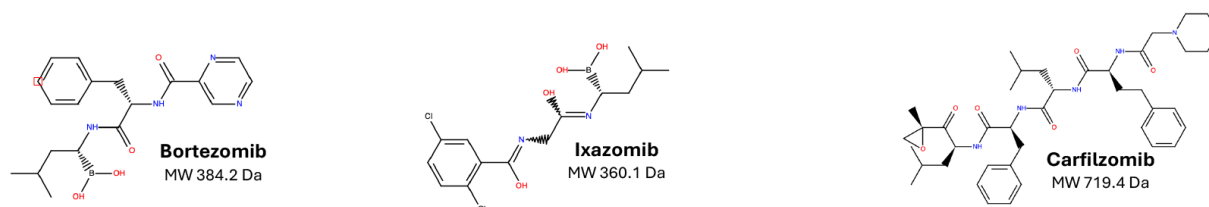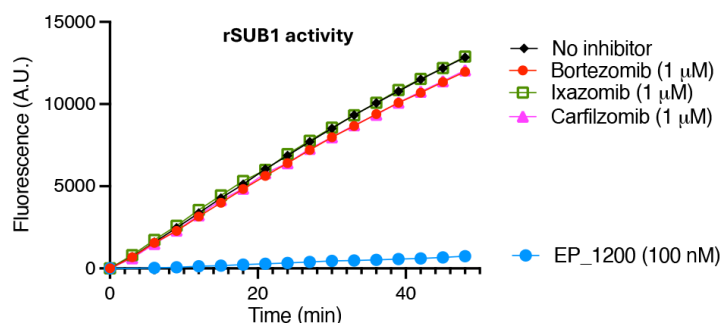

**Figure S1.** Human proteasome inhibitors do not inhibit recombinant PfSUB1. In vitro PfSUB1 activity assay showing lack of inhibition by bortezomib, ixazomib or carfilzomib (1  $\mu$ M final concentration). EP\_1200 (used as a positive control) completely inhibited recombinant PfSUB1 activity at 100 nM. The assay shown is typical of duplicate assays.

## 2. 20S Human Proteasome dose response assay for peptidic boronic acid SUB1 inhibitors

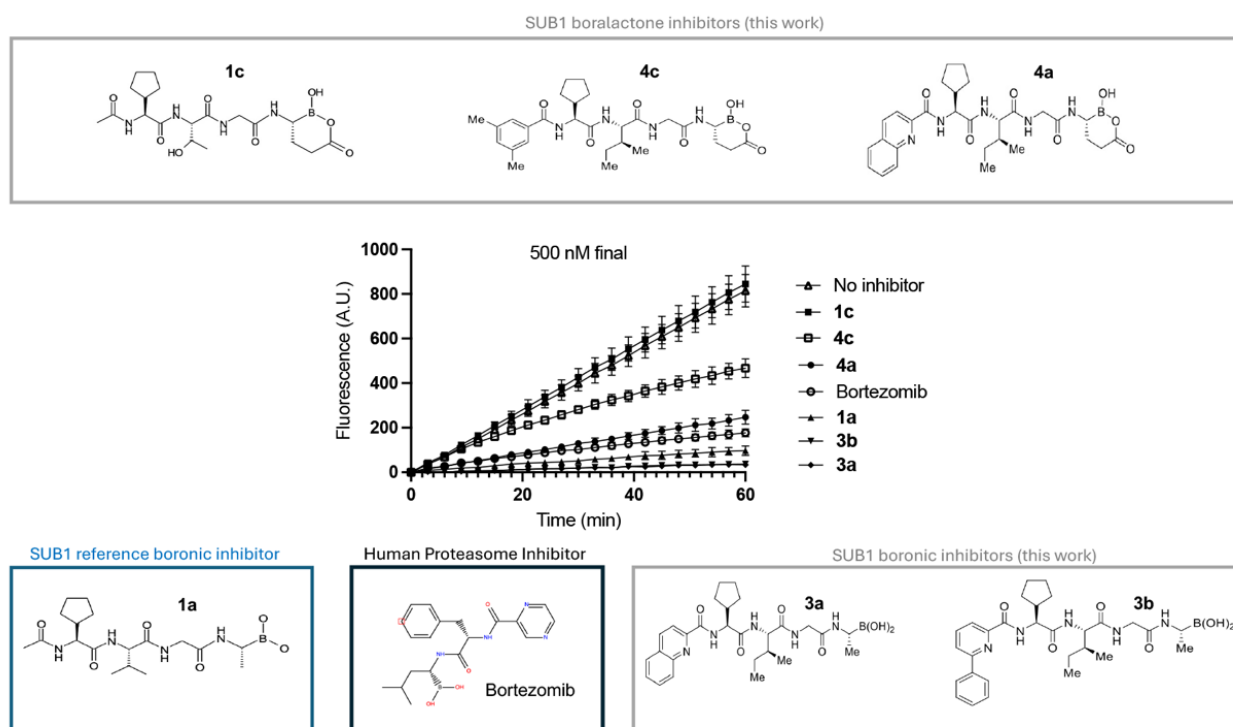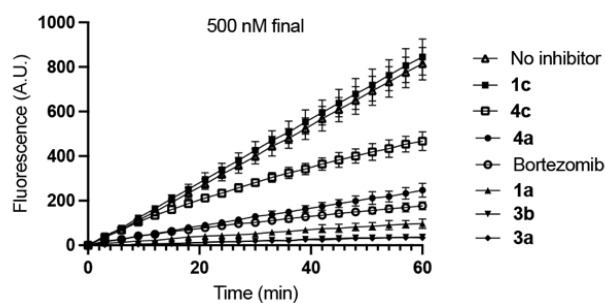

**Figure S2.** 20S Human proteasome dose response assay. The peptidic boronic acid PfSUB1 inhibitors **1a**, **3a**, **3b**, the borolactone PfSUB1 inhibitors **1c**, **4c**, **4a** and the bortezomib control were used at 500 nM final in a fluorescence-based enzymatic assay measuring the chymotrypsin-like activity ( $\beta$ 5) of the human 20S proteasome. All measurements were performed in duplicate, with points shown as mean values. Error bars, S.D.

### 3. Docking of bortezomib and inhibitors 1a, 3b, 1c and 4c into PfSUB1

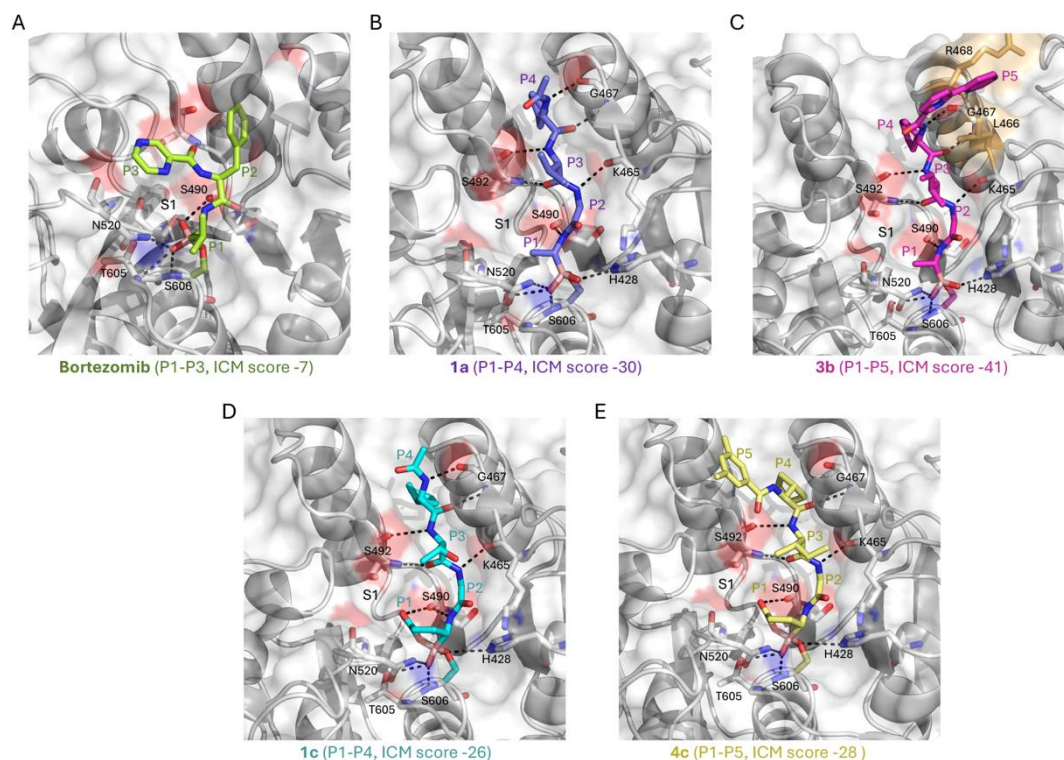

**Figure S3.** Bortezomib, compound **1a**, **3b**, **1c** and **4c** docked into PfSUB1(PDB: 4lvn). SUB1 is shown as a cartoon with a semi-transparent molecular surface colored by elements (O: red, N: blue). Positions P1 to P5 of inhibitors are indicated, the boron atom is colored in pink. Stabilizing H-bonds are shown as black dashed lines. **A.**: Bortezomib docked into the active site of PfSUB1 (ICM score -7) is shown as green sticks colored by elements. The P1 Leu side chain did not fill the S1 polar pocket and faced outwards the pocket. **B.**: compound **1a** docked into the active site PfSUB1 (ICM score -30) is shown as purple sticks colored by elements. The P1 Ala side chain fitted the S1 pocket. **C.**: compound **3b** docked into the active site PfSUB1(ICM score -41) is shown as magenta sticks colored by elements. The P1 Ala side chain fitted the S1 pocket. The P5 phenyl pyridine capping group was stabilized by Pi-stacking interactions involving Leu466 and Arg468 (in wheat colour). **D.**: compound **1c** docked into the active site of PfSUB1 (ICM score -26) is shown as teal sticks colored by elements. The boralactone group fitted the S1 polar pocket. **E.**: compound **4c** docked into the active site of PfSUB1 (ICM score -28) is shown as yellow sticks colored by elements. The boralactone group fitted the S1 polar pocket

#### 4. Compound 2a–h, 3a–j, 4a–c characterization spectra

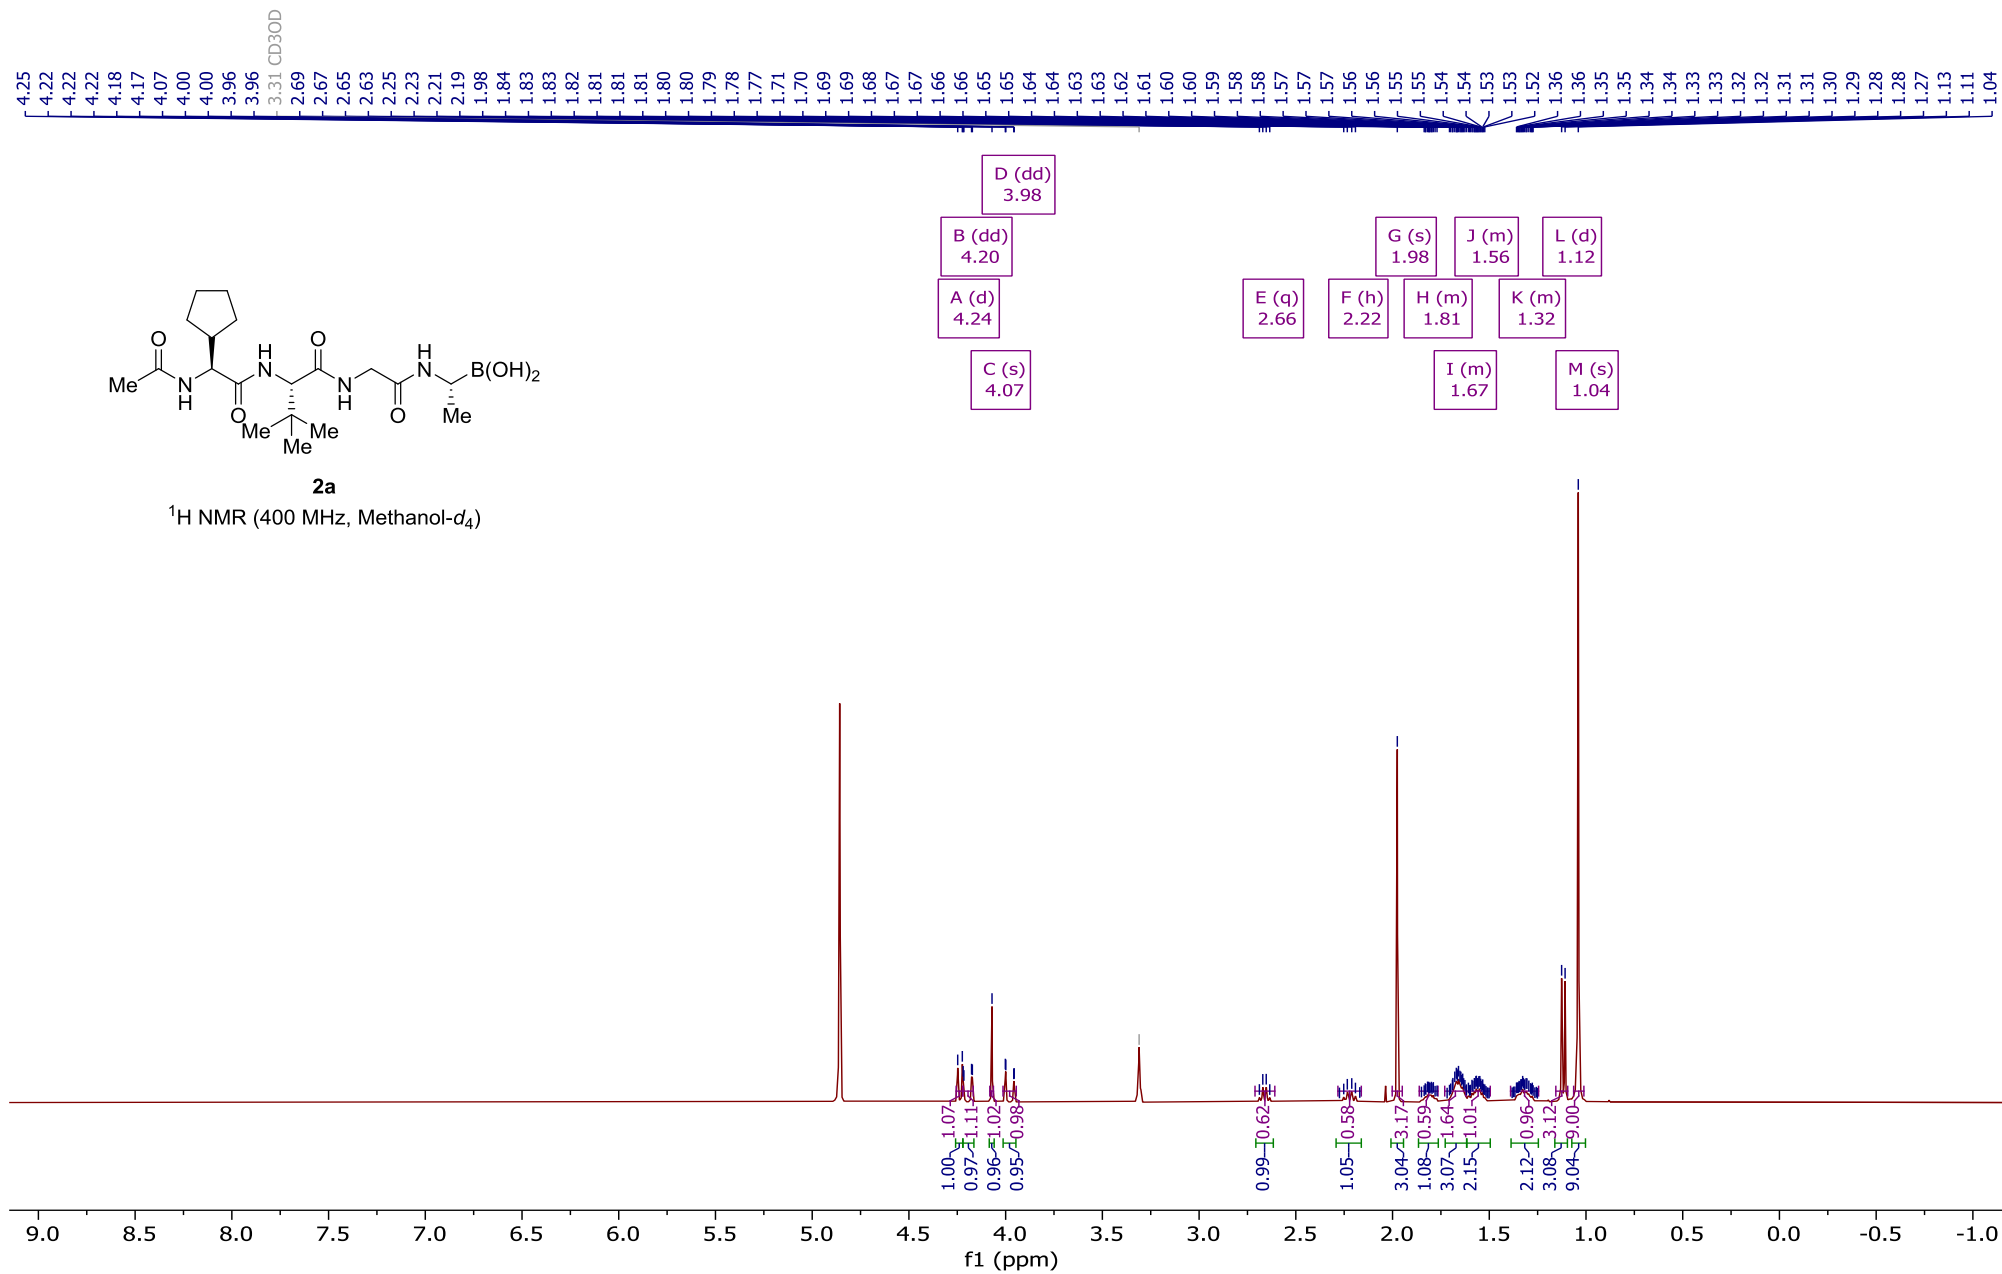

176.2  
174.8  
173.5  
173.4

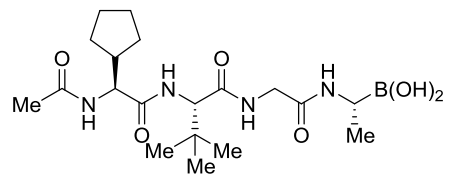

<sup>13</sup>C NMR (101 MHz, Methanol-d<sub>4</sub>)

63.5  
58.9

42.9  
41.9  
39.5  
34.6  
30.4  
30.3  
27.0  
26.3  
25.9  
22.3  
15.9

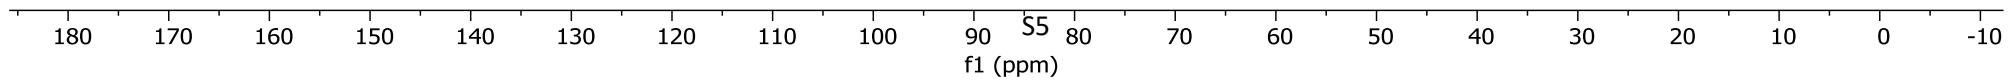

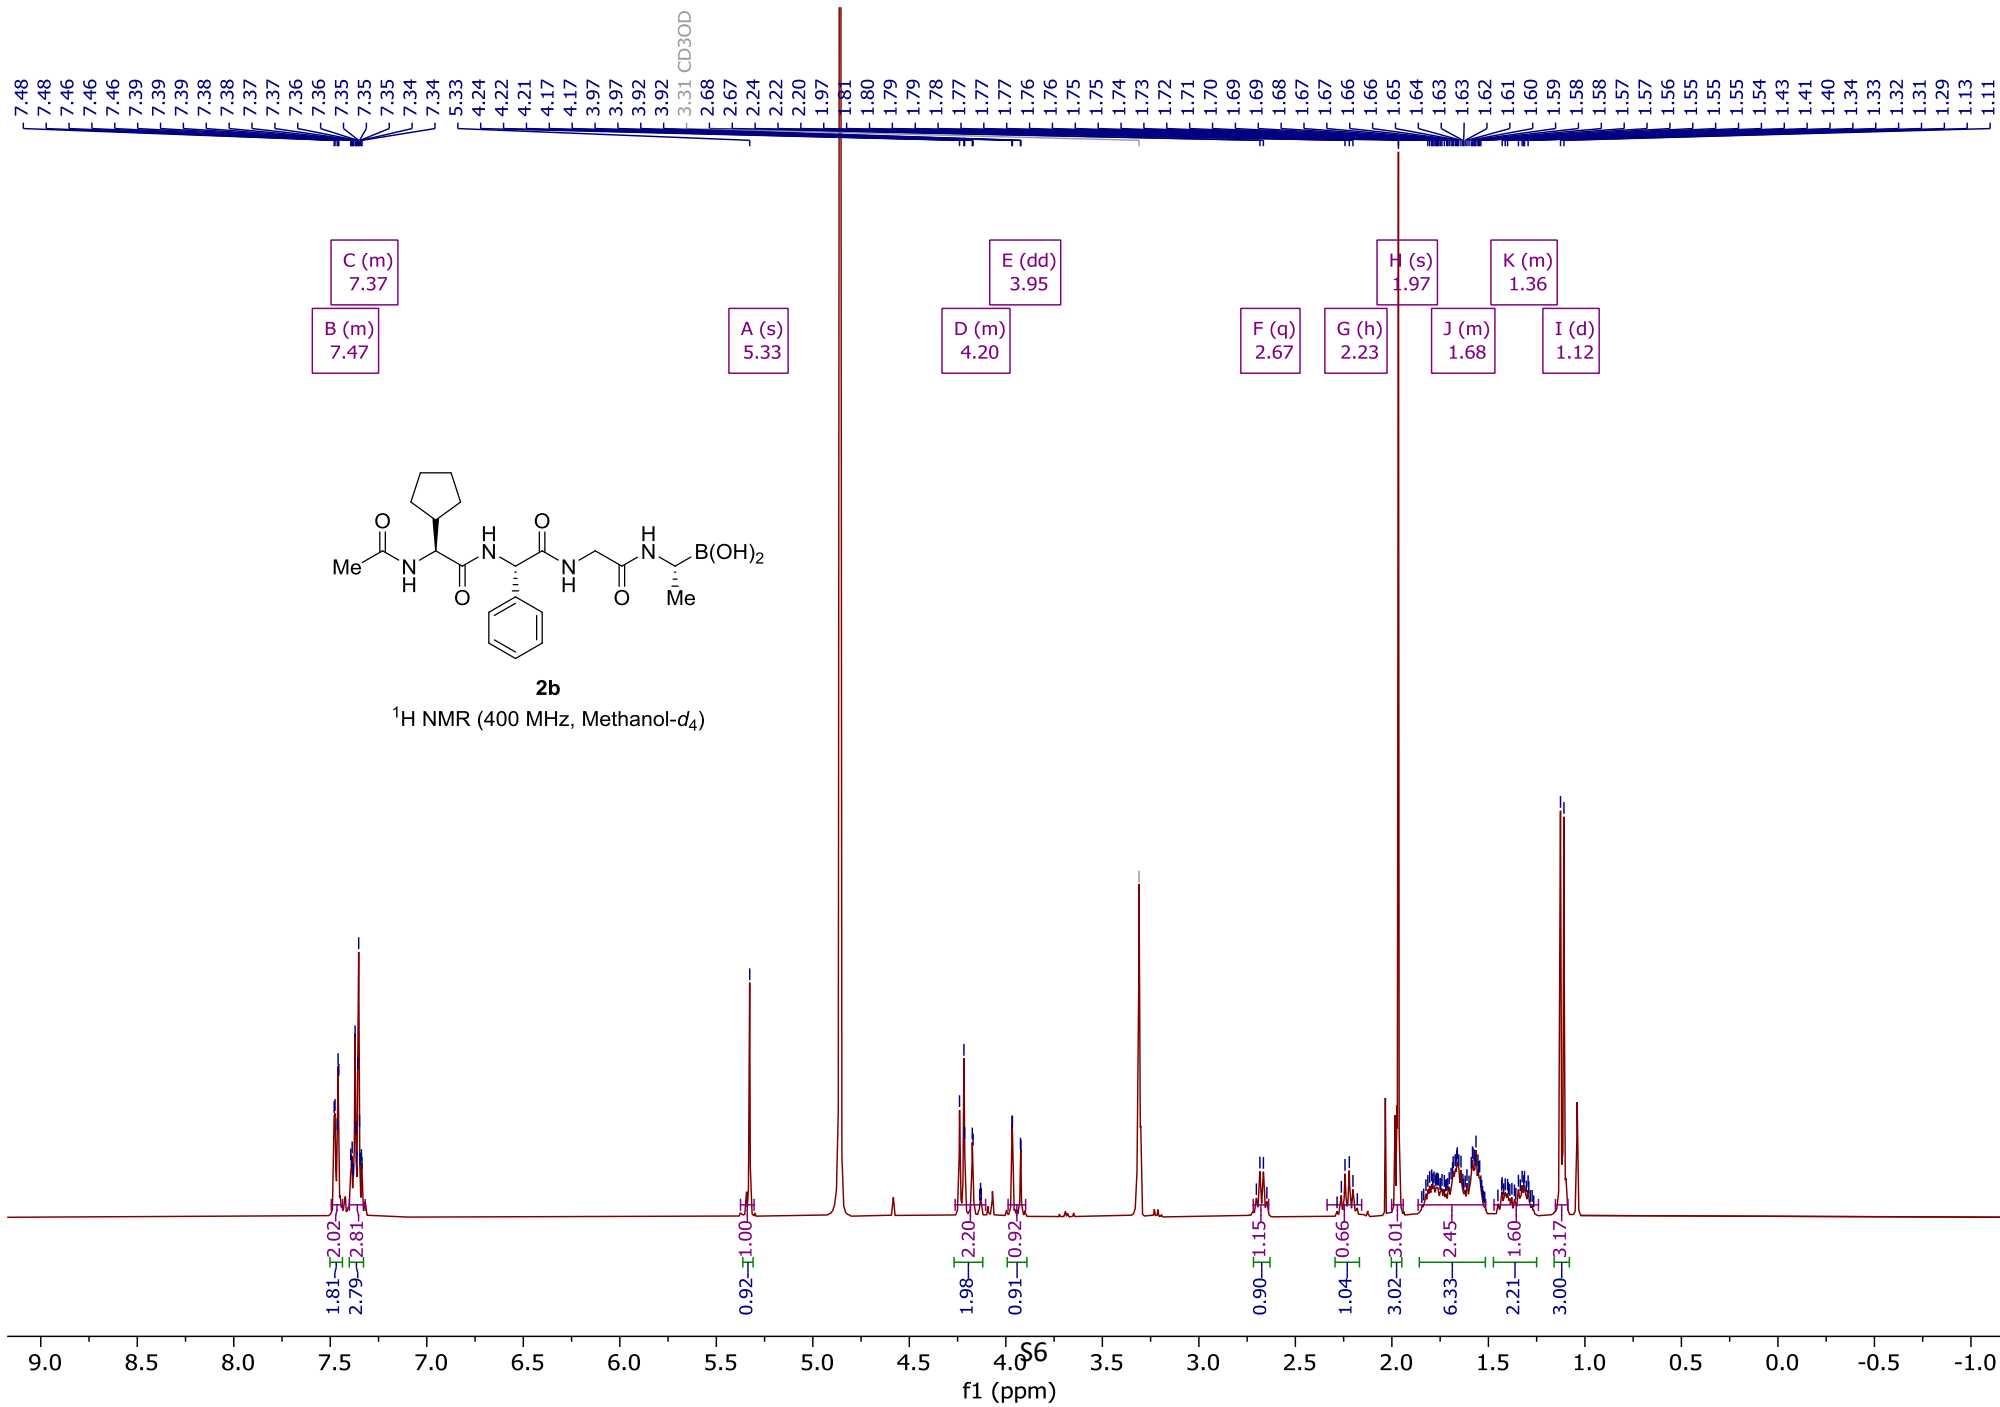

176.2  
174.4  
173.4  
173.1

137.3

129.9  
129.7  
129.0

59.4  
58.6

43.2  
41.9  
39.9

30.3  
30.2  
26.2  
25.9  
22.3

15.9

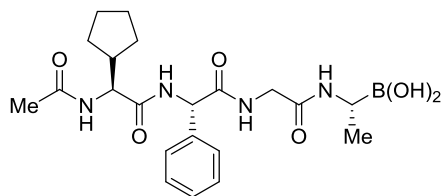

**2b**

<sup>13</sup>C NMR (101 MHz, Methanol-d<sub>4</sub>)

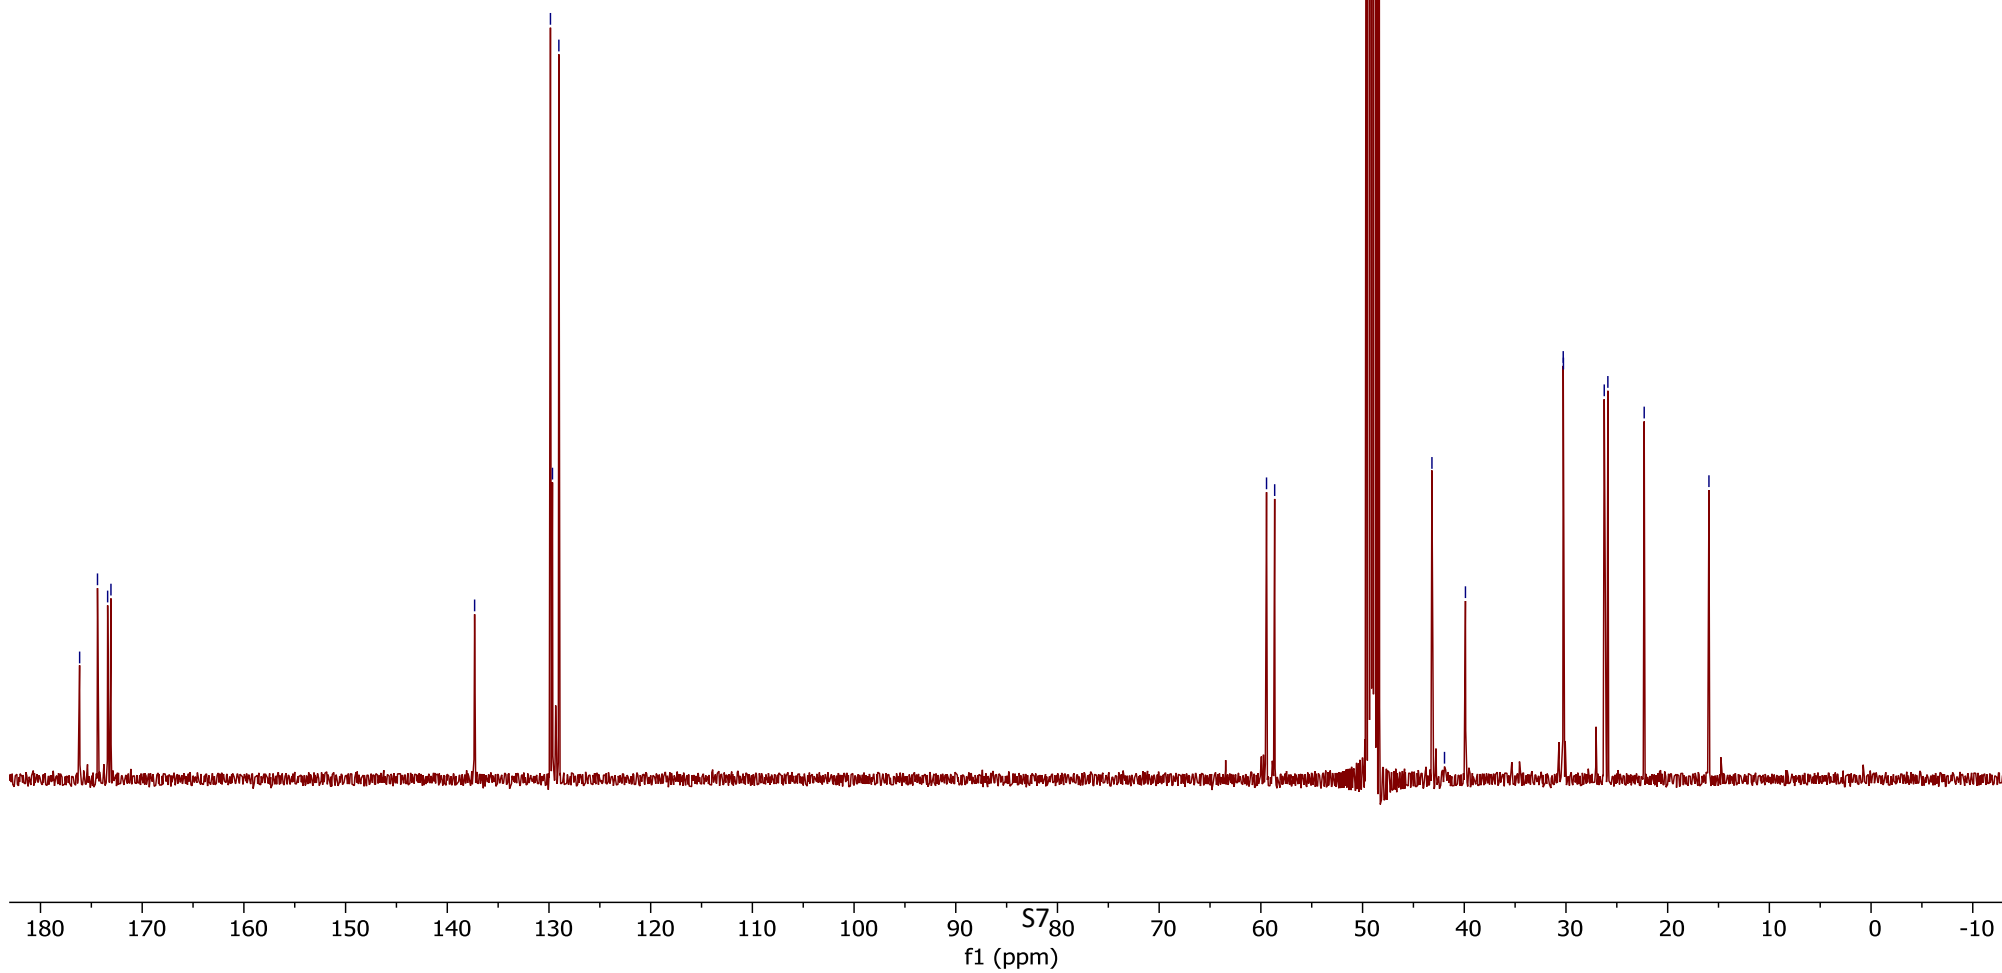

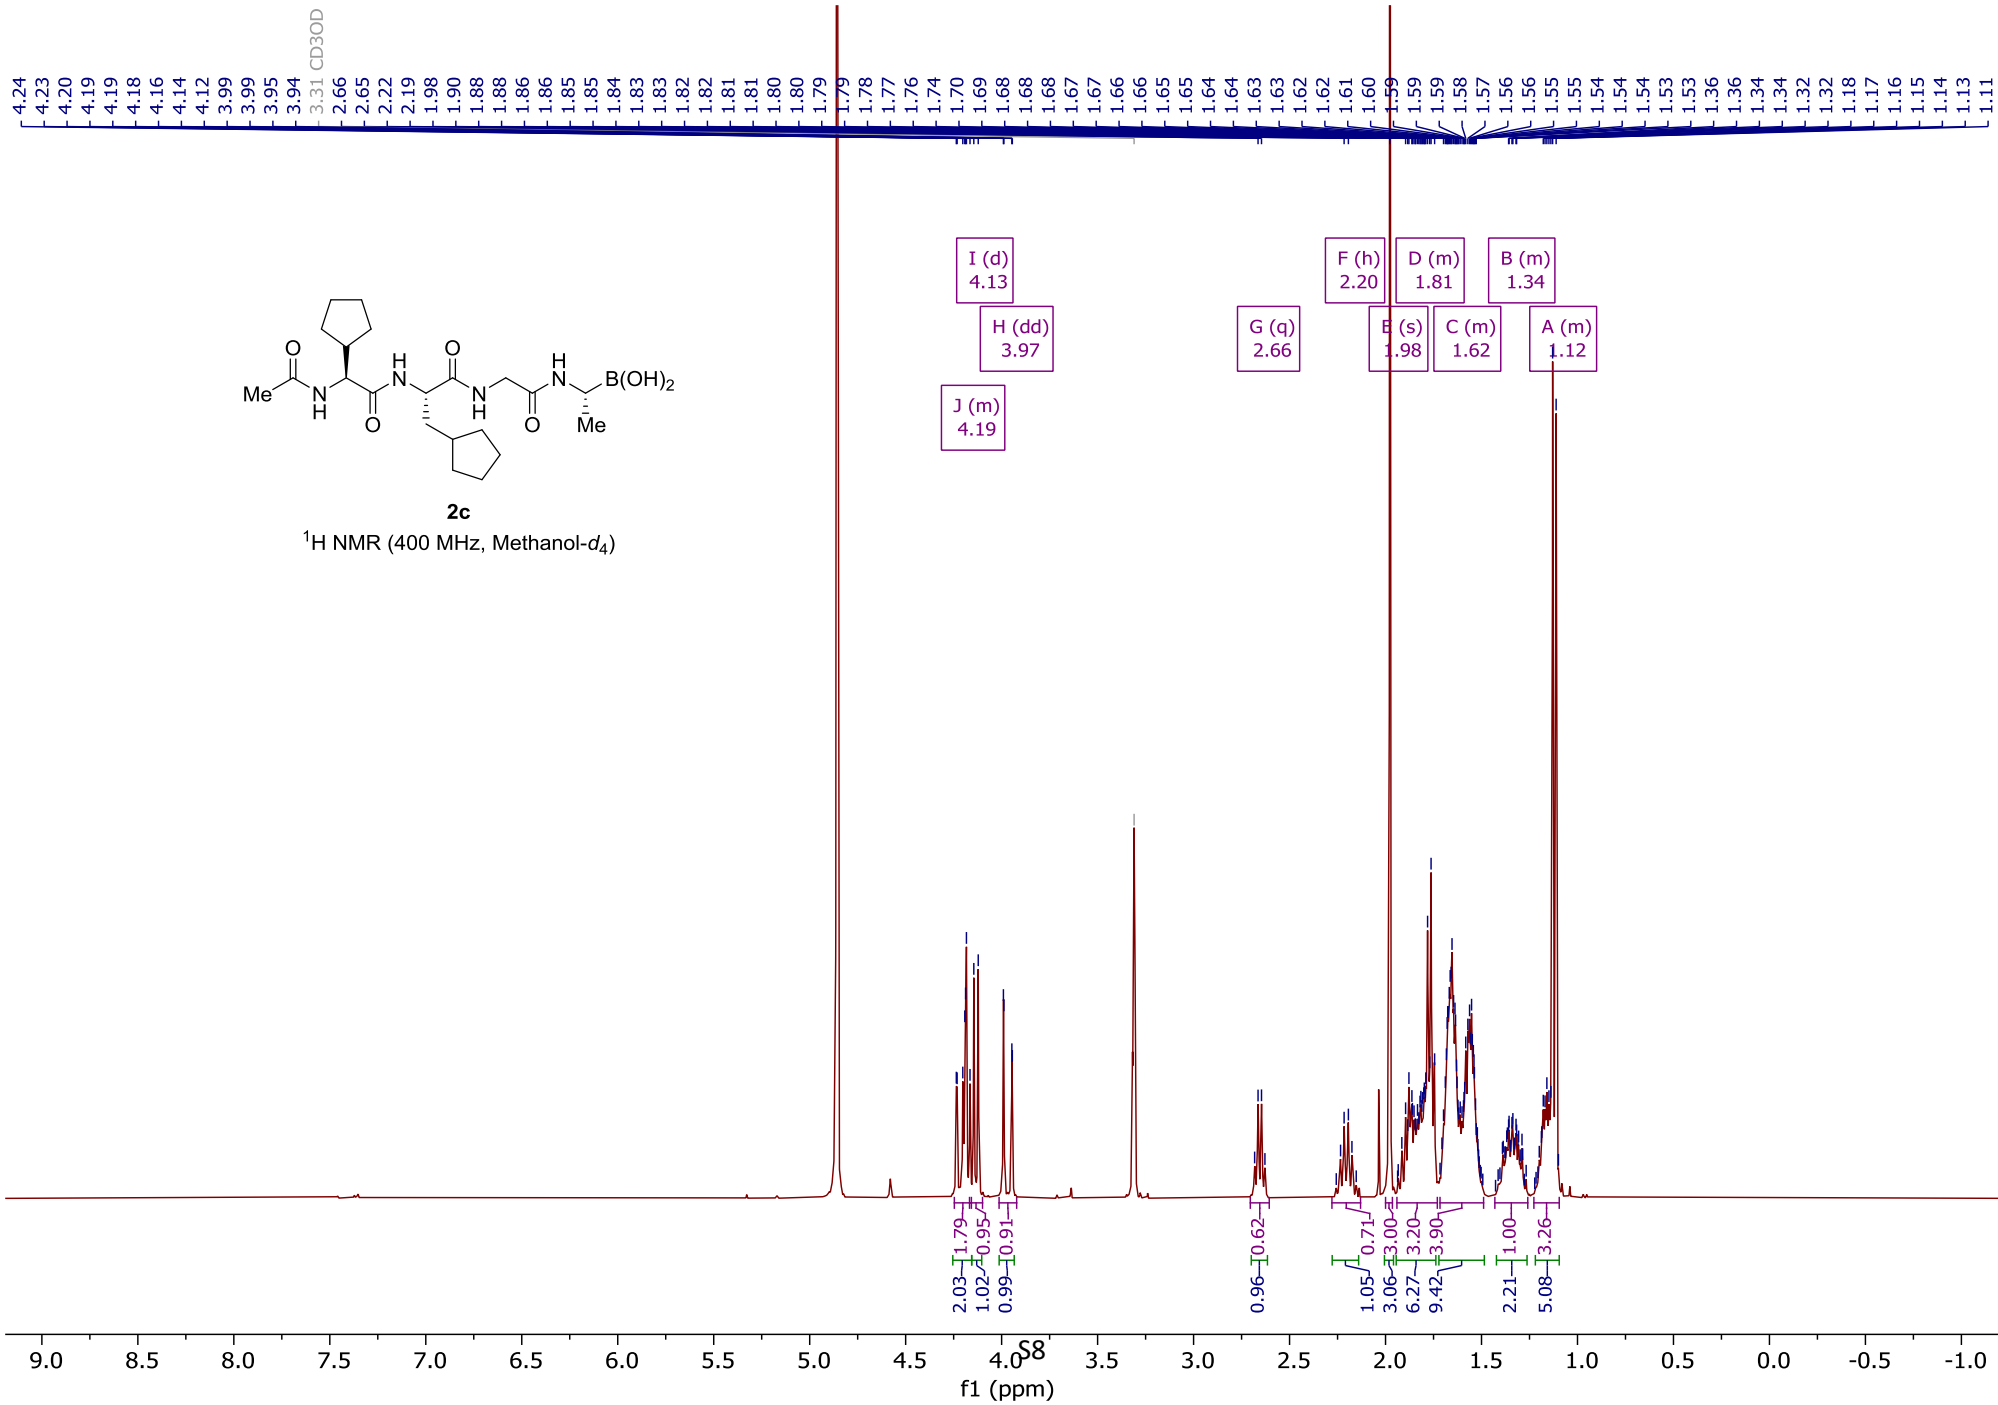



176.3  
175.3  
175.0  
173.5

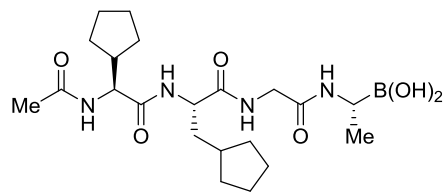

**2c**

<sup>13</sup>C NMR (101 MHz, Methanol-d<sub>4</sub>)

59.0  
55.1

43.1  
42.0  
39.8  
38.3  
37.7  
33.7  
33.2  
30.4  
30.2  
26.2  
26.1  
26.0  
25.9  
22.3  
15.9

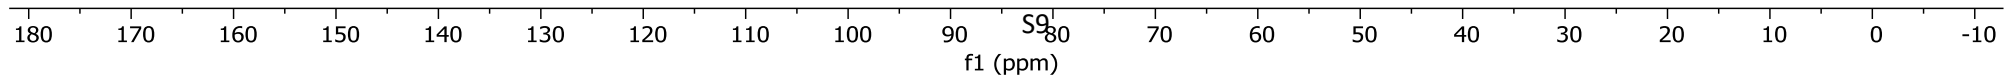

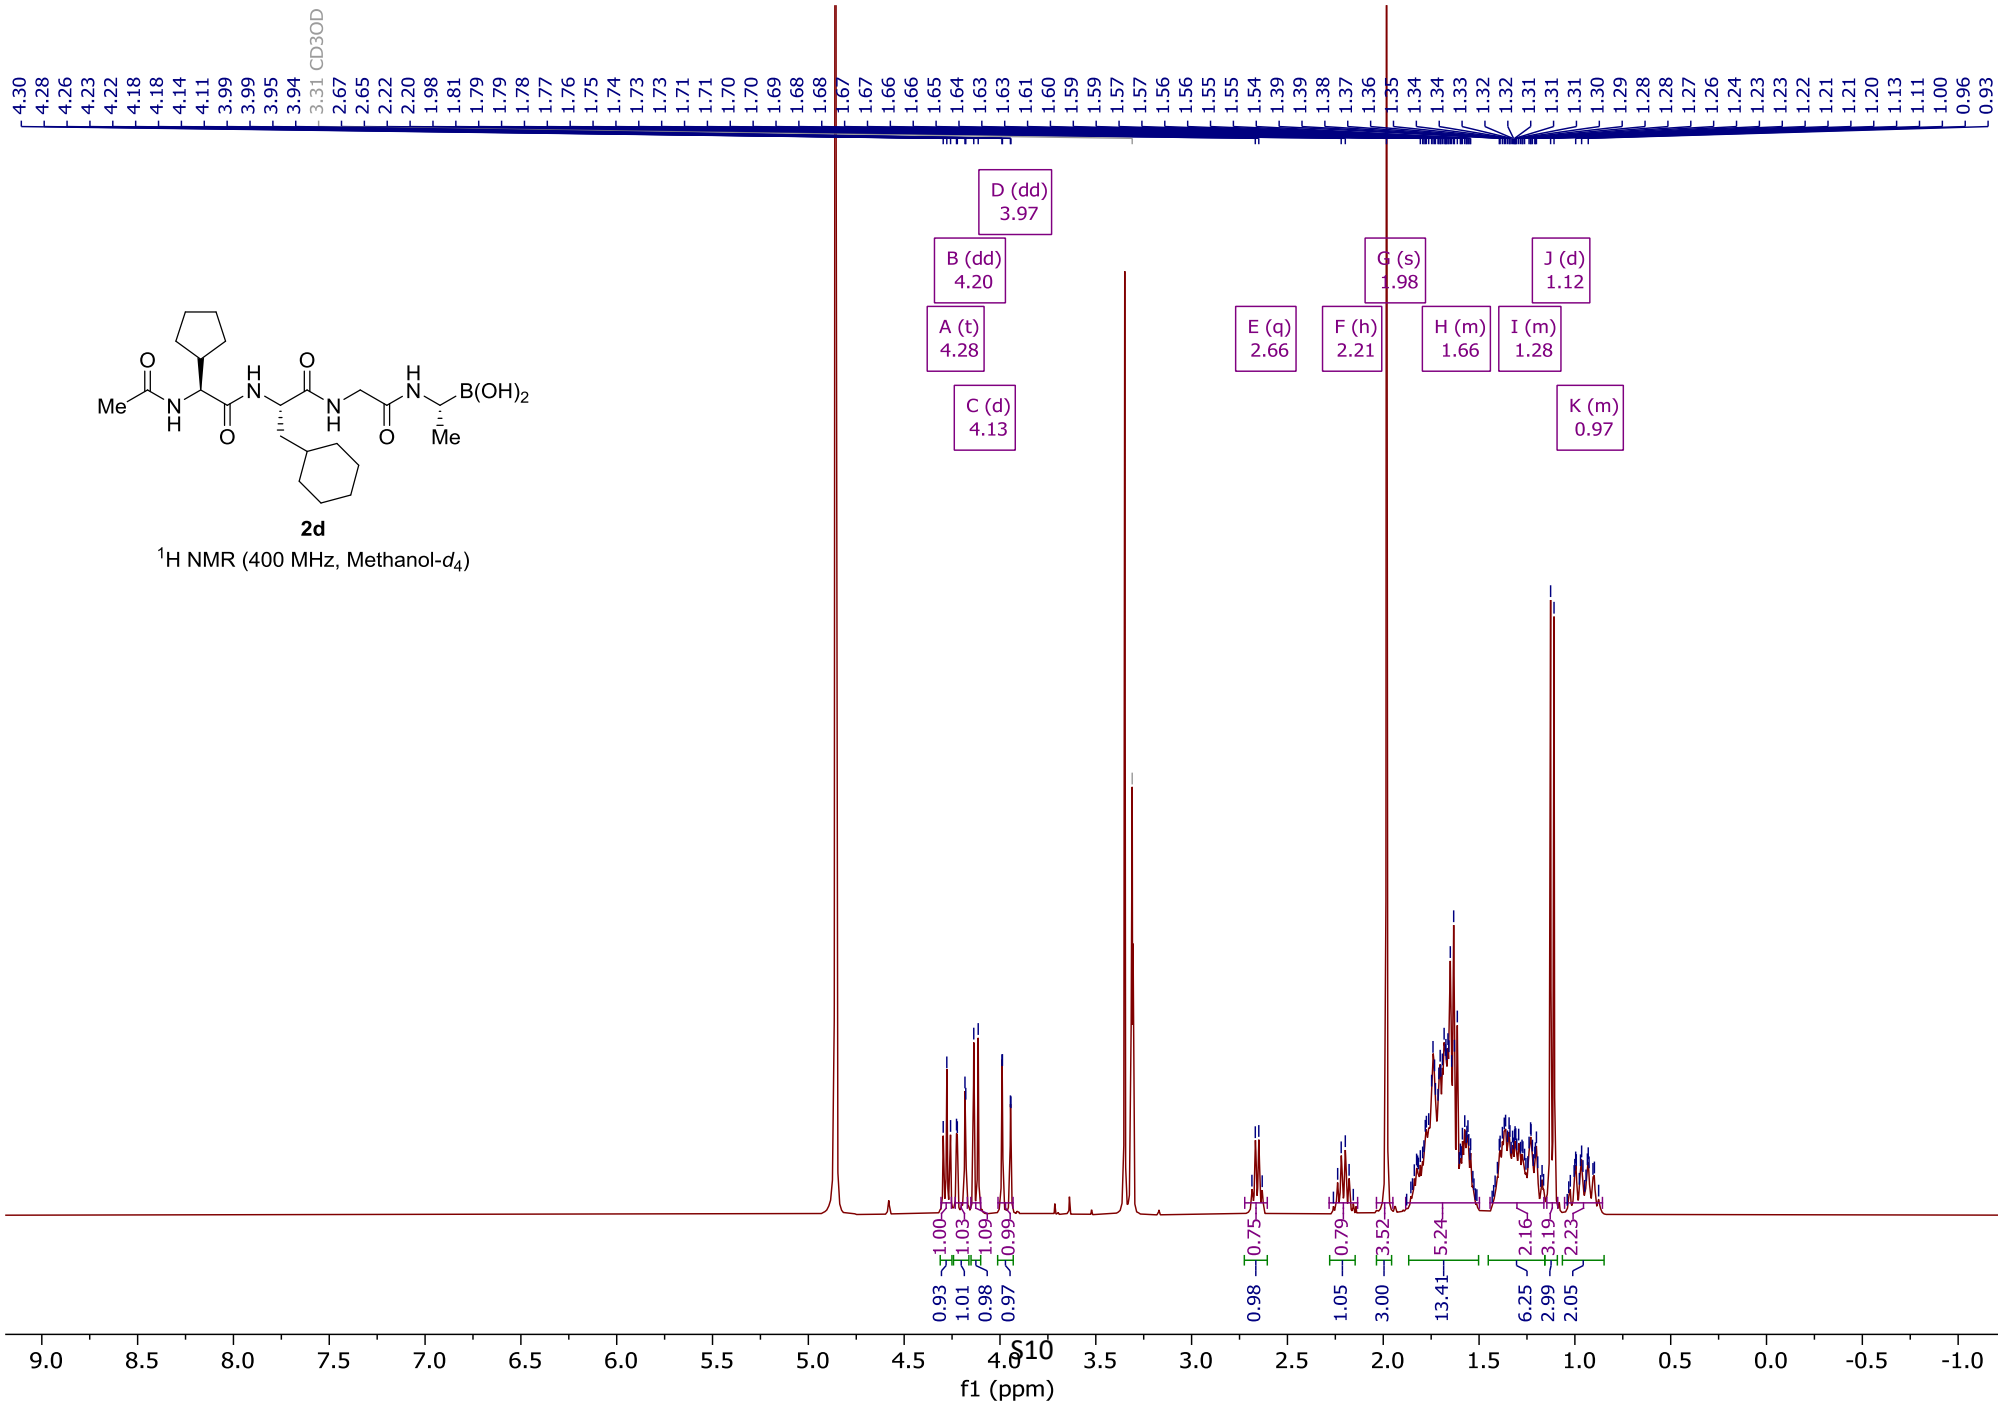

176.3  
175.5  
175.0  
173.5

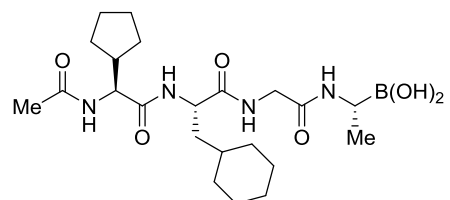

**2d**

$^{13}\text{C}$  NMR (101 MHz, Methanol- $d_4$ )

59.1  
53.1  
49.0 CD3OD  
43.0  
41.9  
39.8  
39.5  
35.2  
34.8  
33.5  
30.4  
30.2  
27.6  
27.4  
27.2  
26.2  
25.9  
22.4  
16.0

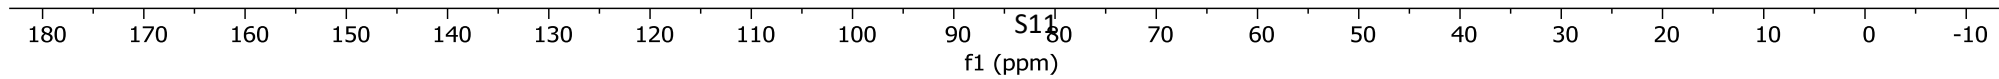

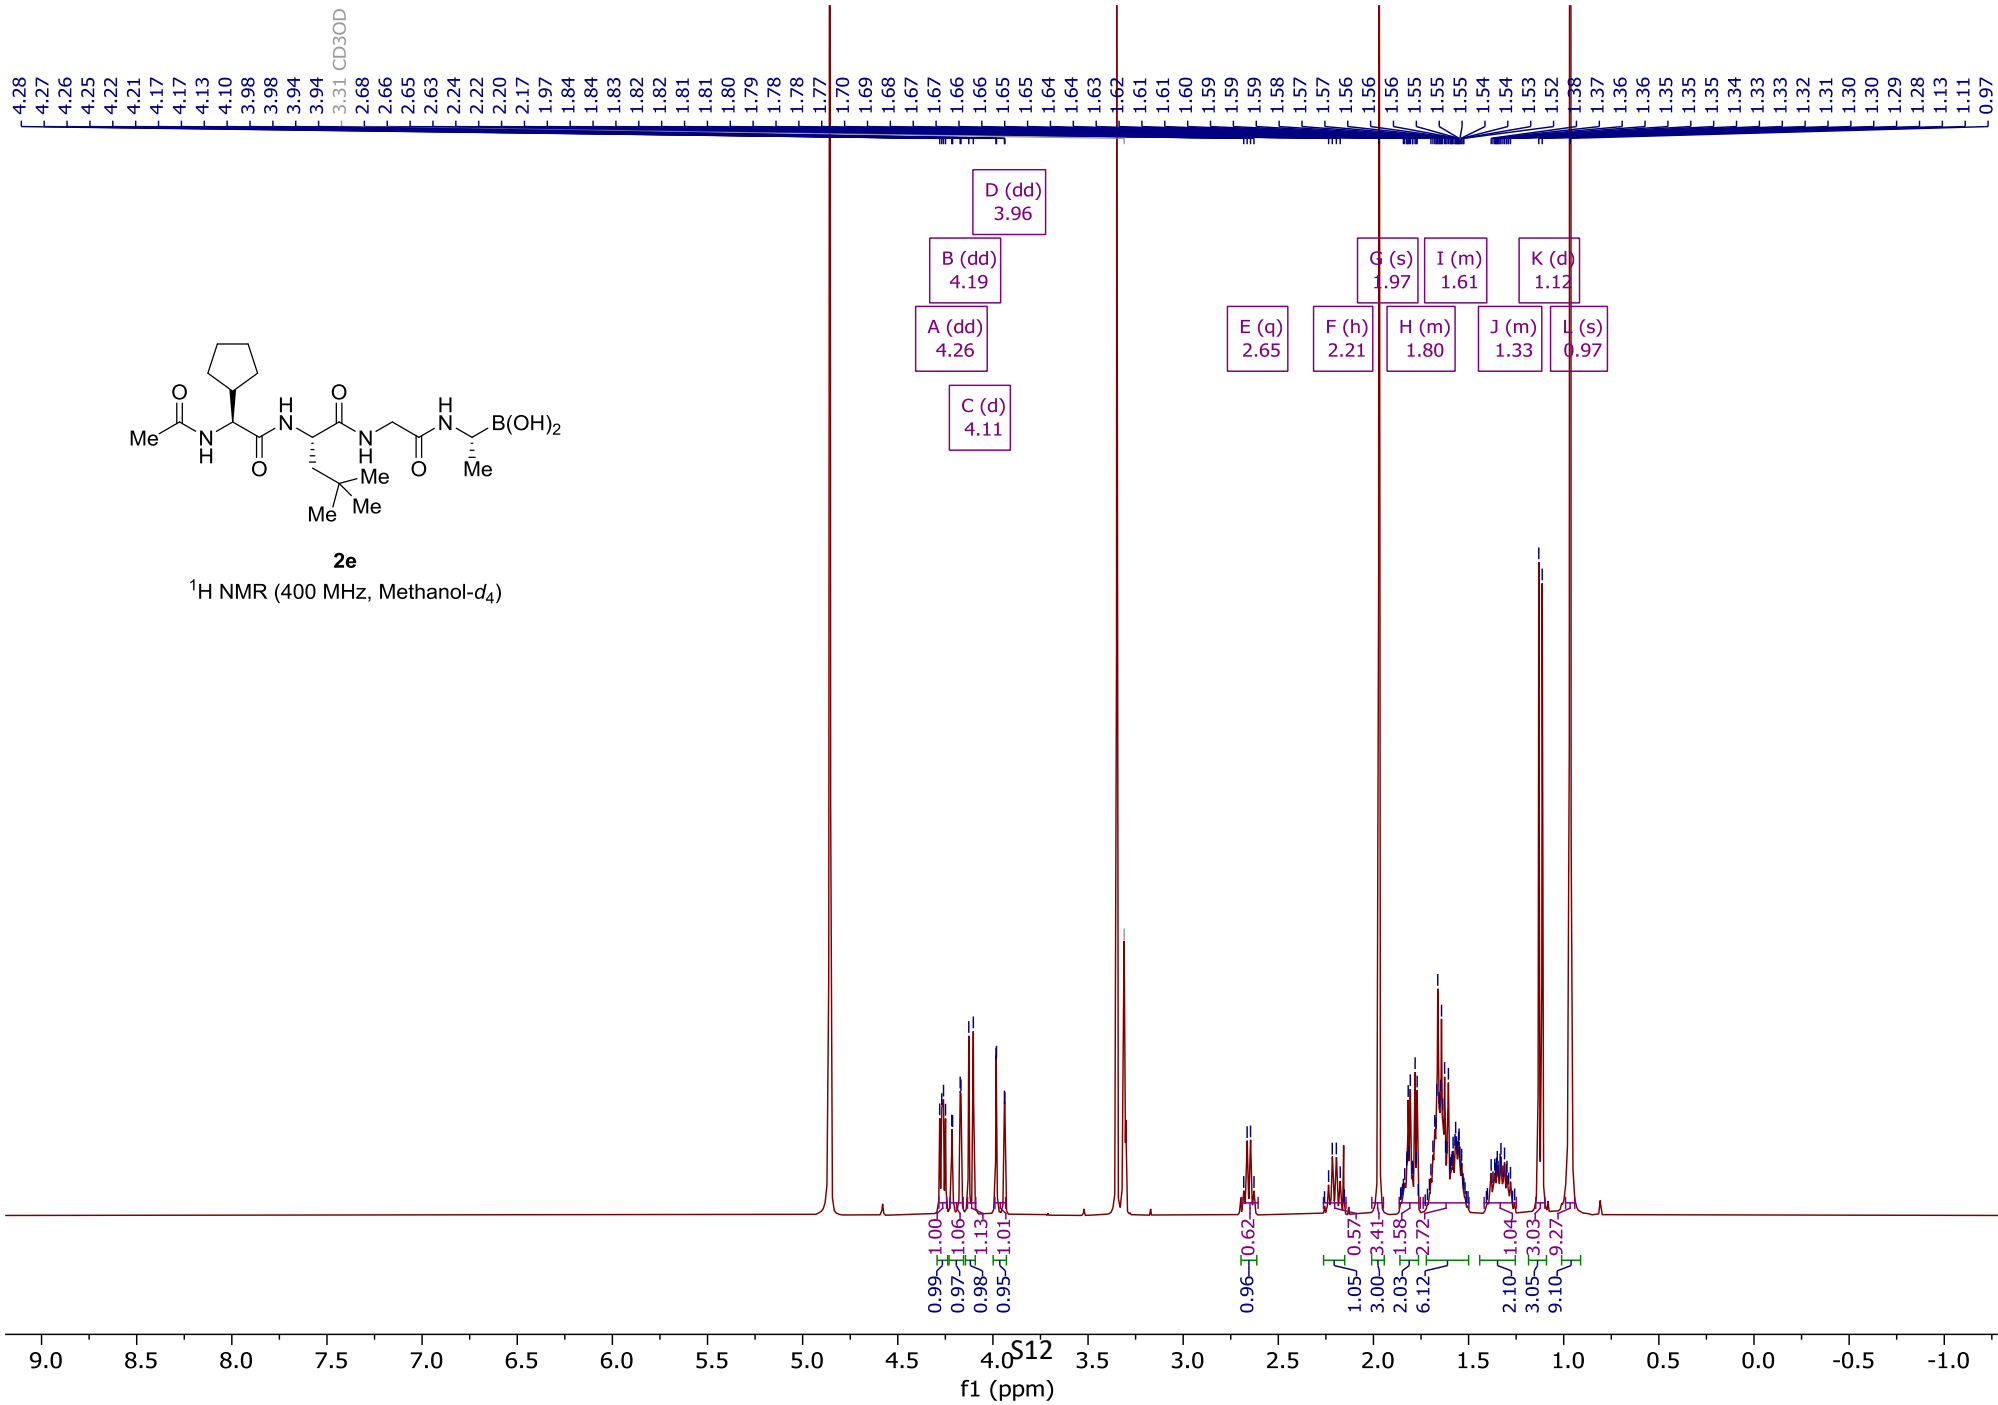

176.3  
175.7  
174.7  
173.5

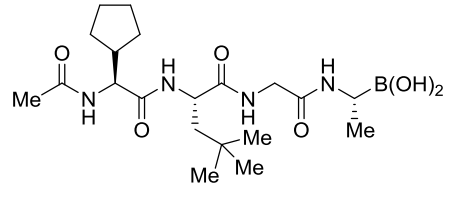

**2e**

<sup>13</sup>C NMR (101 MHz, Methanol-d<sub>4</sub>)

59.1  
52.9  
49.0 CD3OD  
45.5  
43.0  
41.8  
39.8  
31.3  
30.5  
30.2  
30.0  
26.3  
25.9  
22.3  
16.0

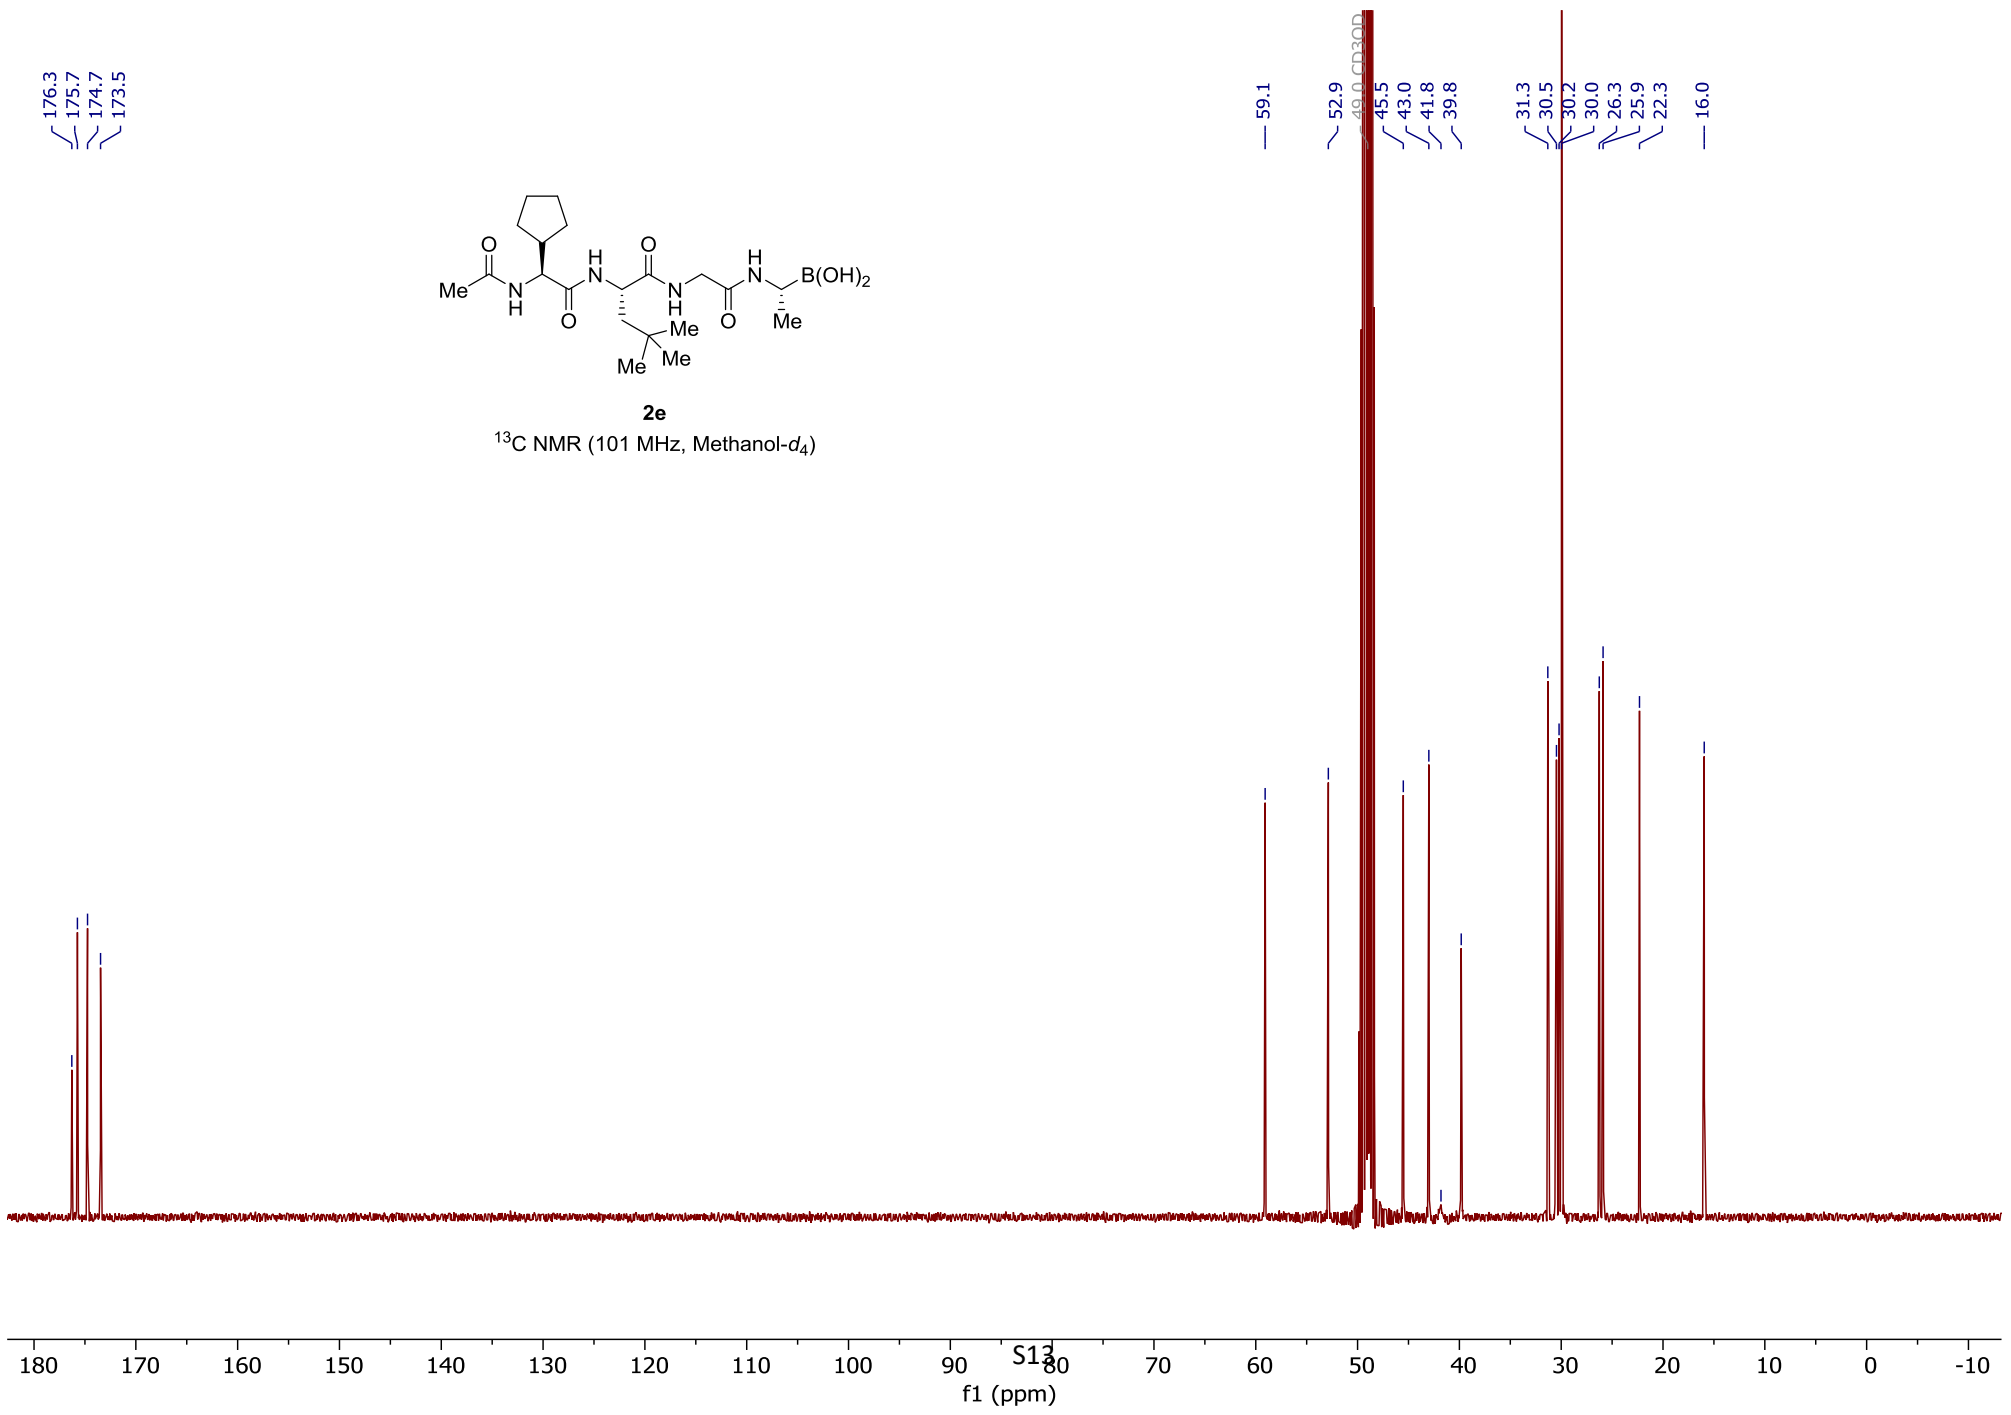

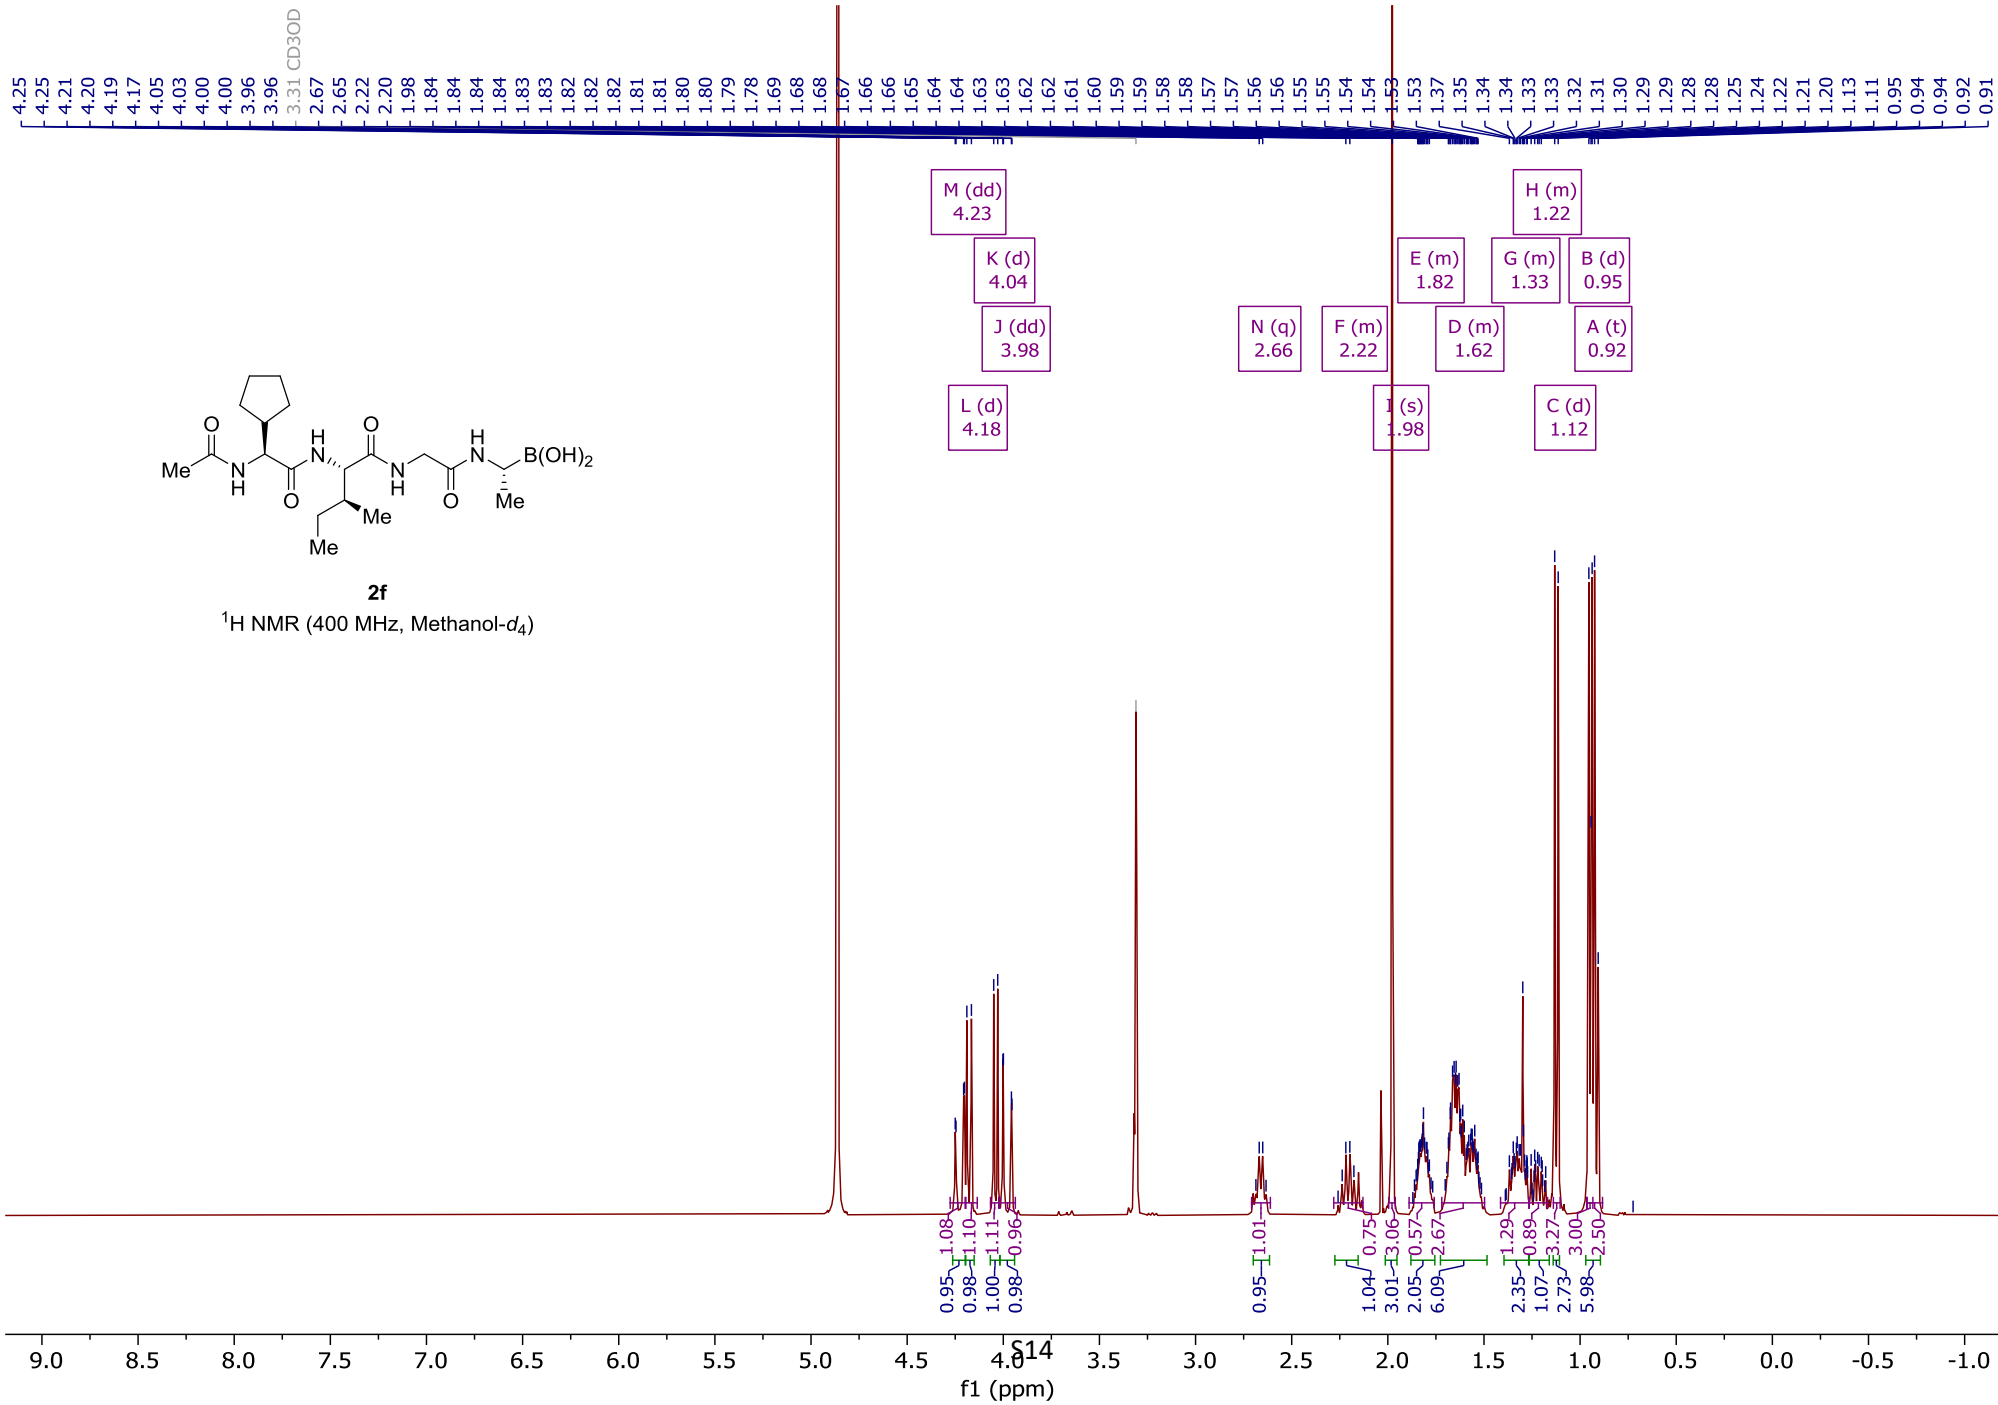



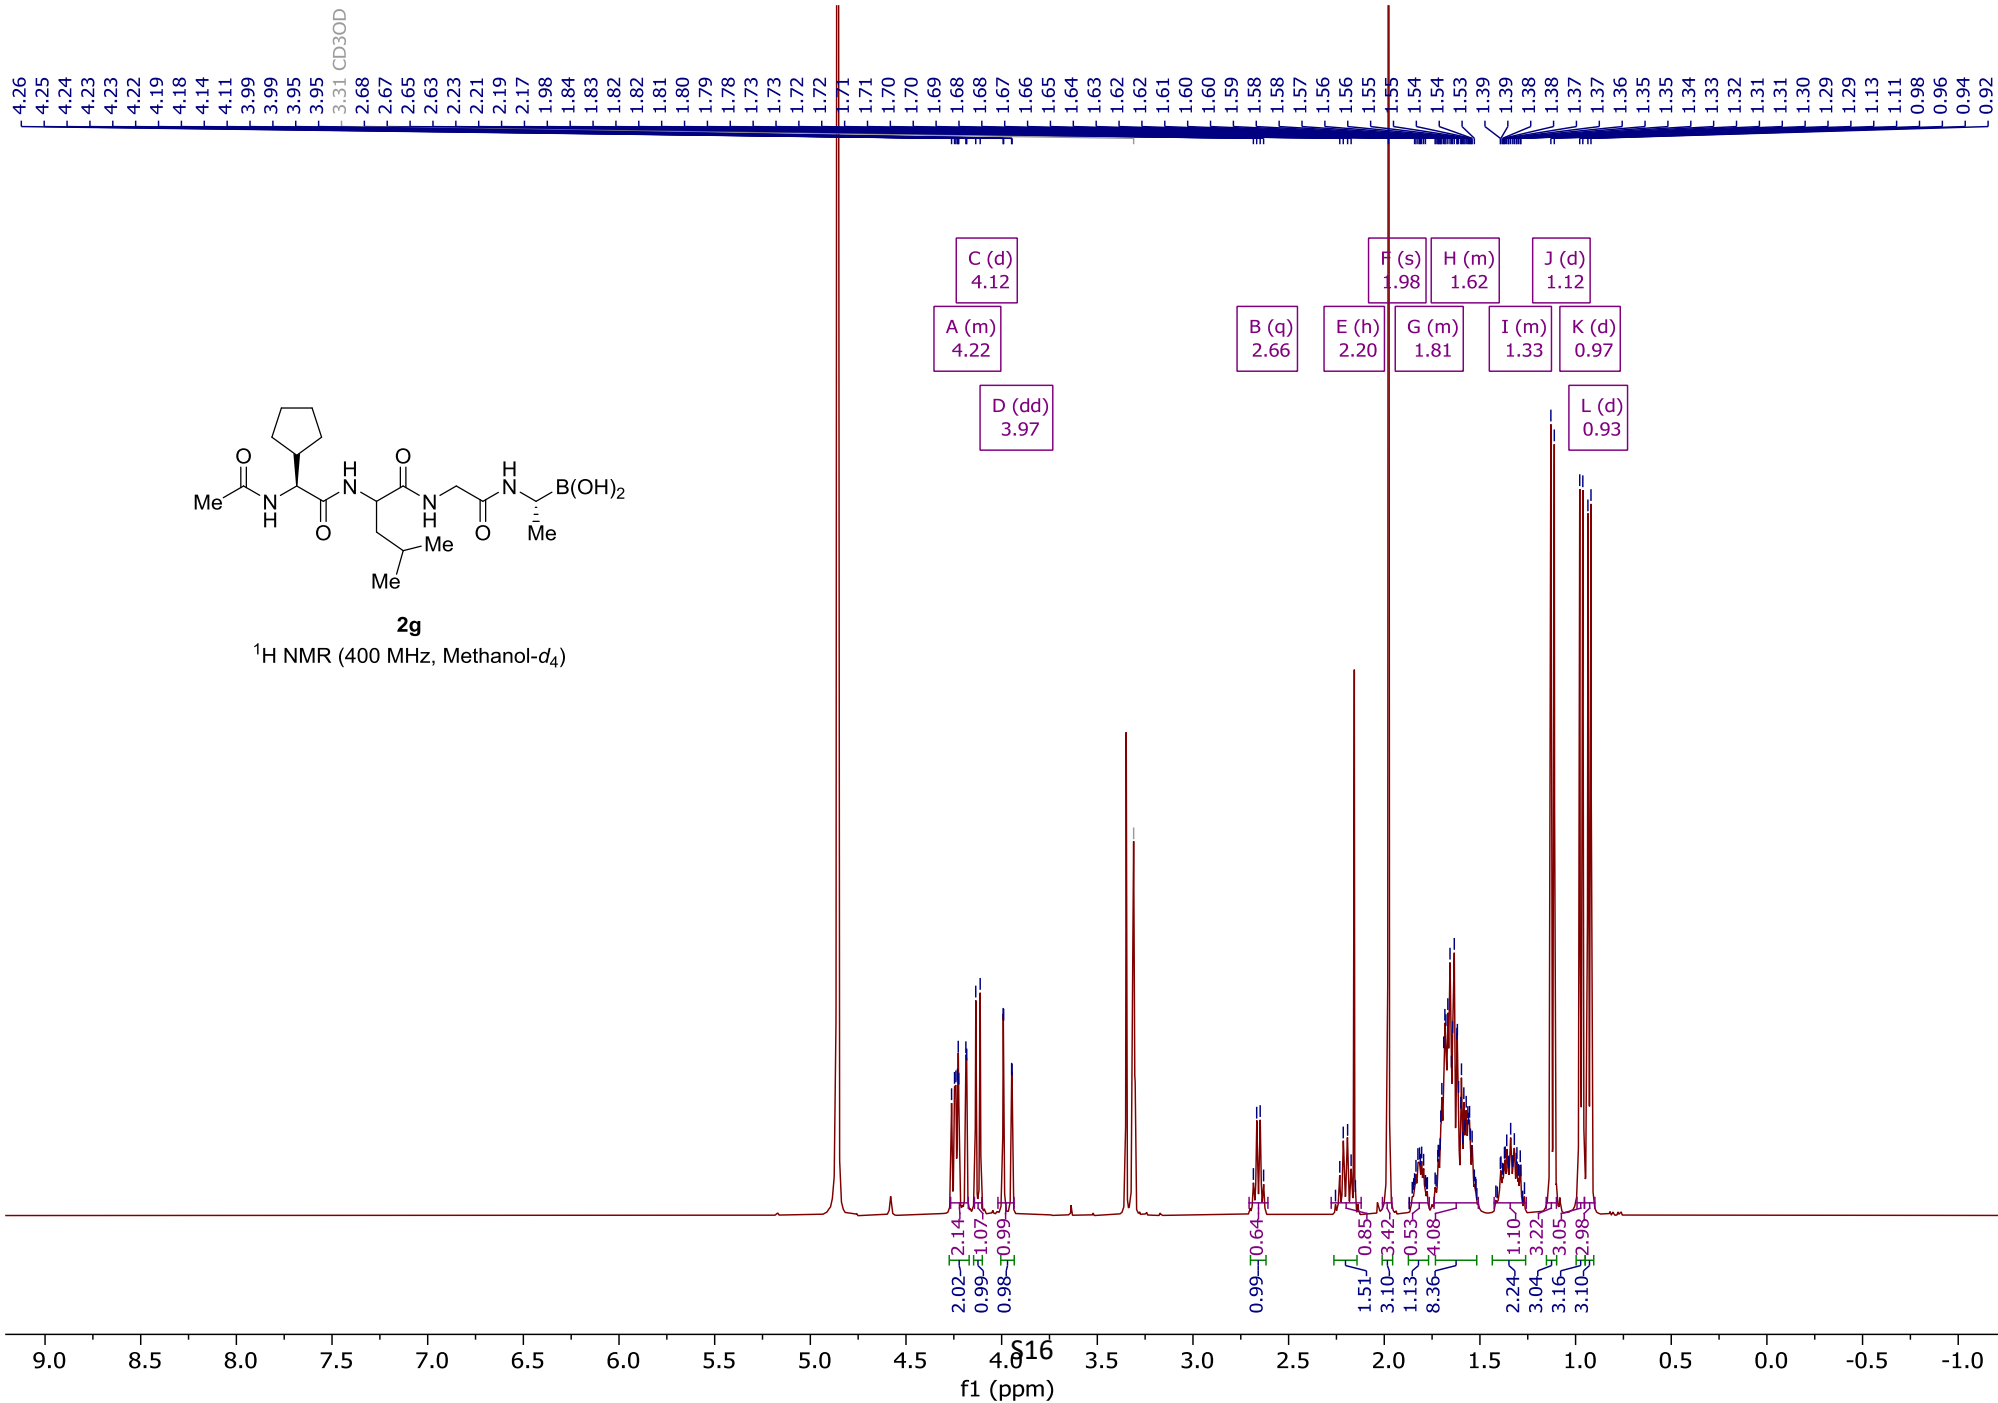





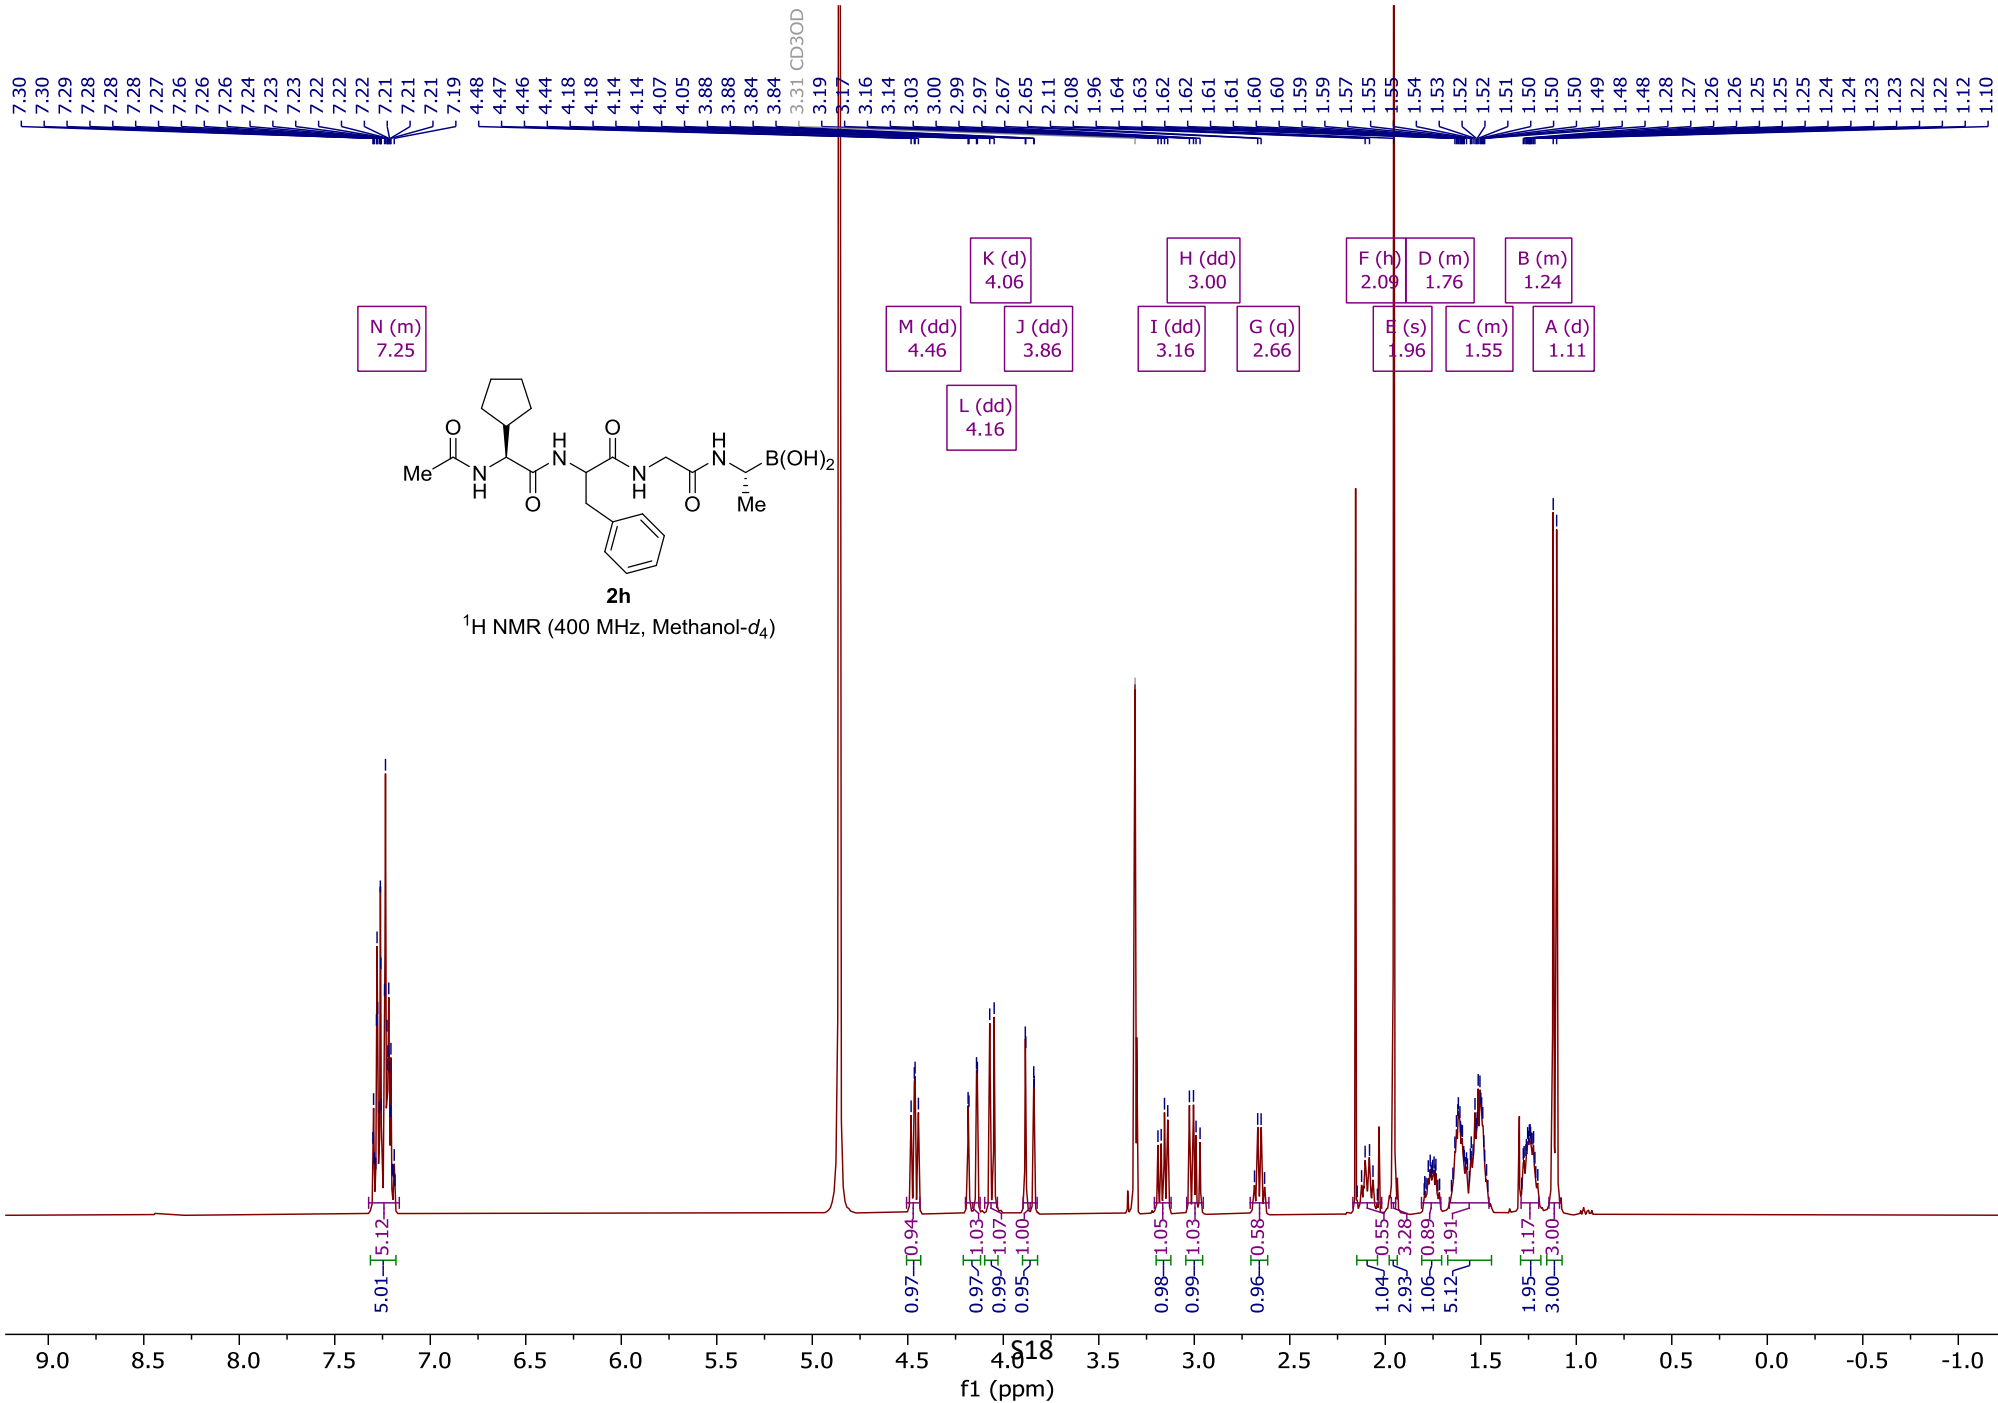

176.2  
174.8  
174.2  
173.6

138.2

130.3  
129.5  
127.9

59.2  
56.8

43.0  
41.8  
39.7  
37.8

30.3  
30.1  
26.1  
25.8  
22.4

16.0

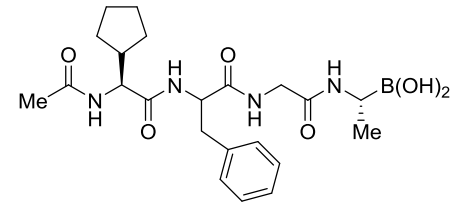

**2h**

<sup>13</sup>C NMR (101 MHz, Methanol-d<sub>4</sub>)

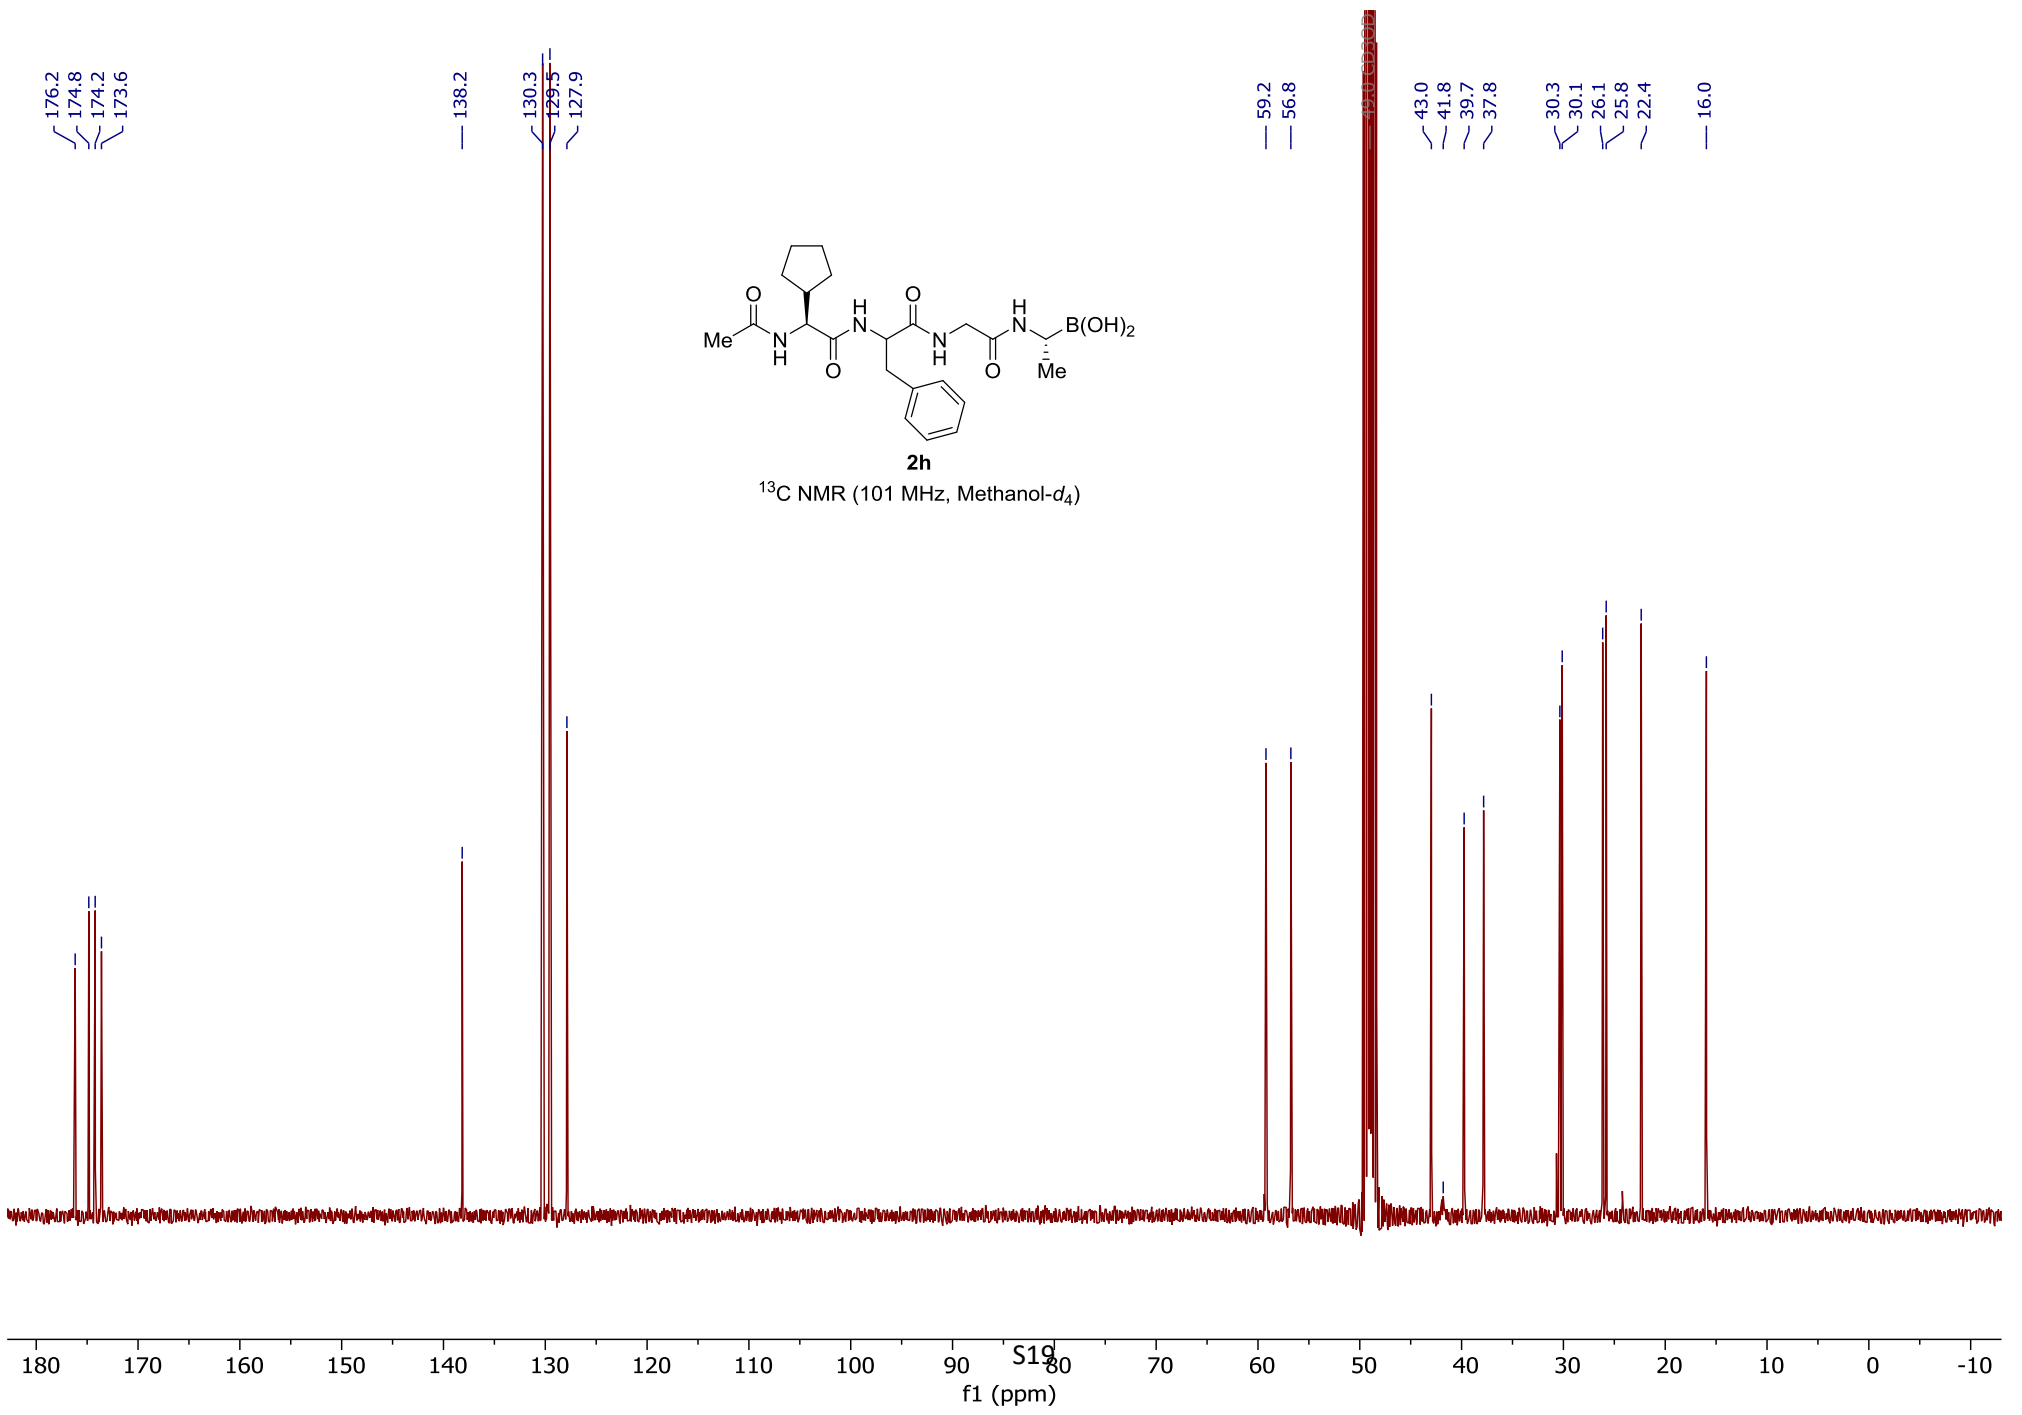

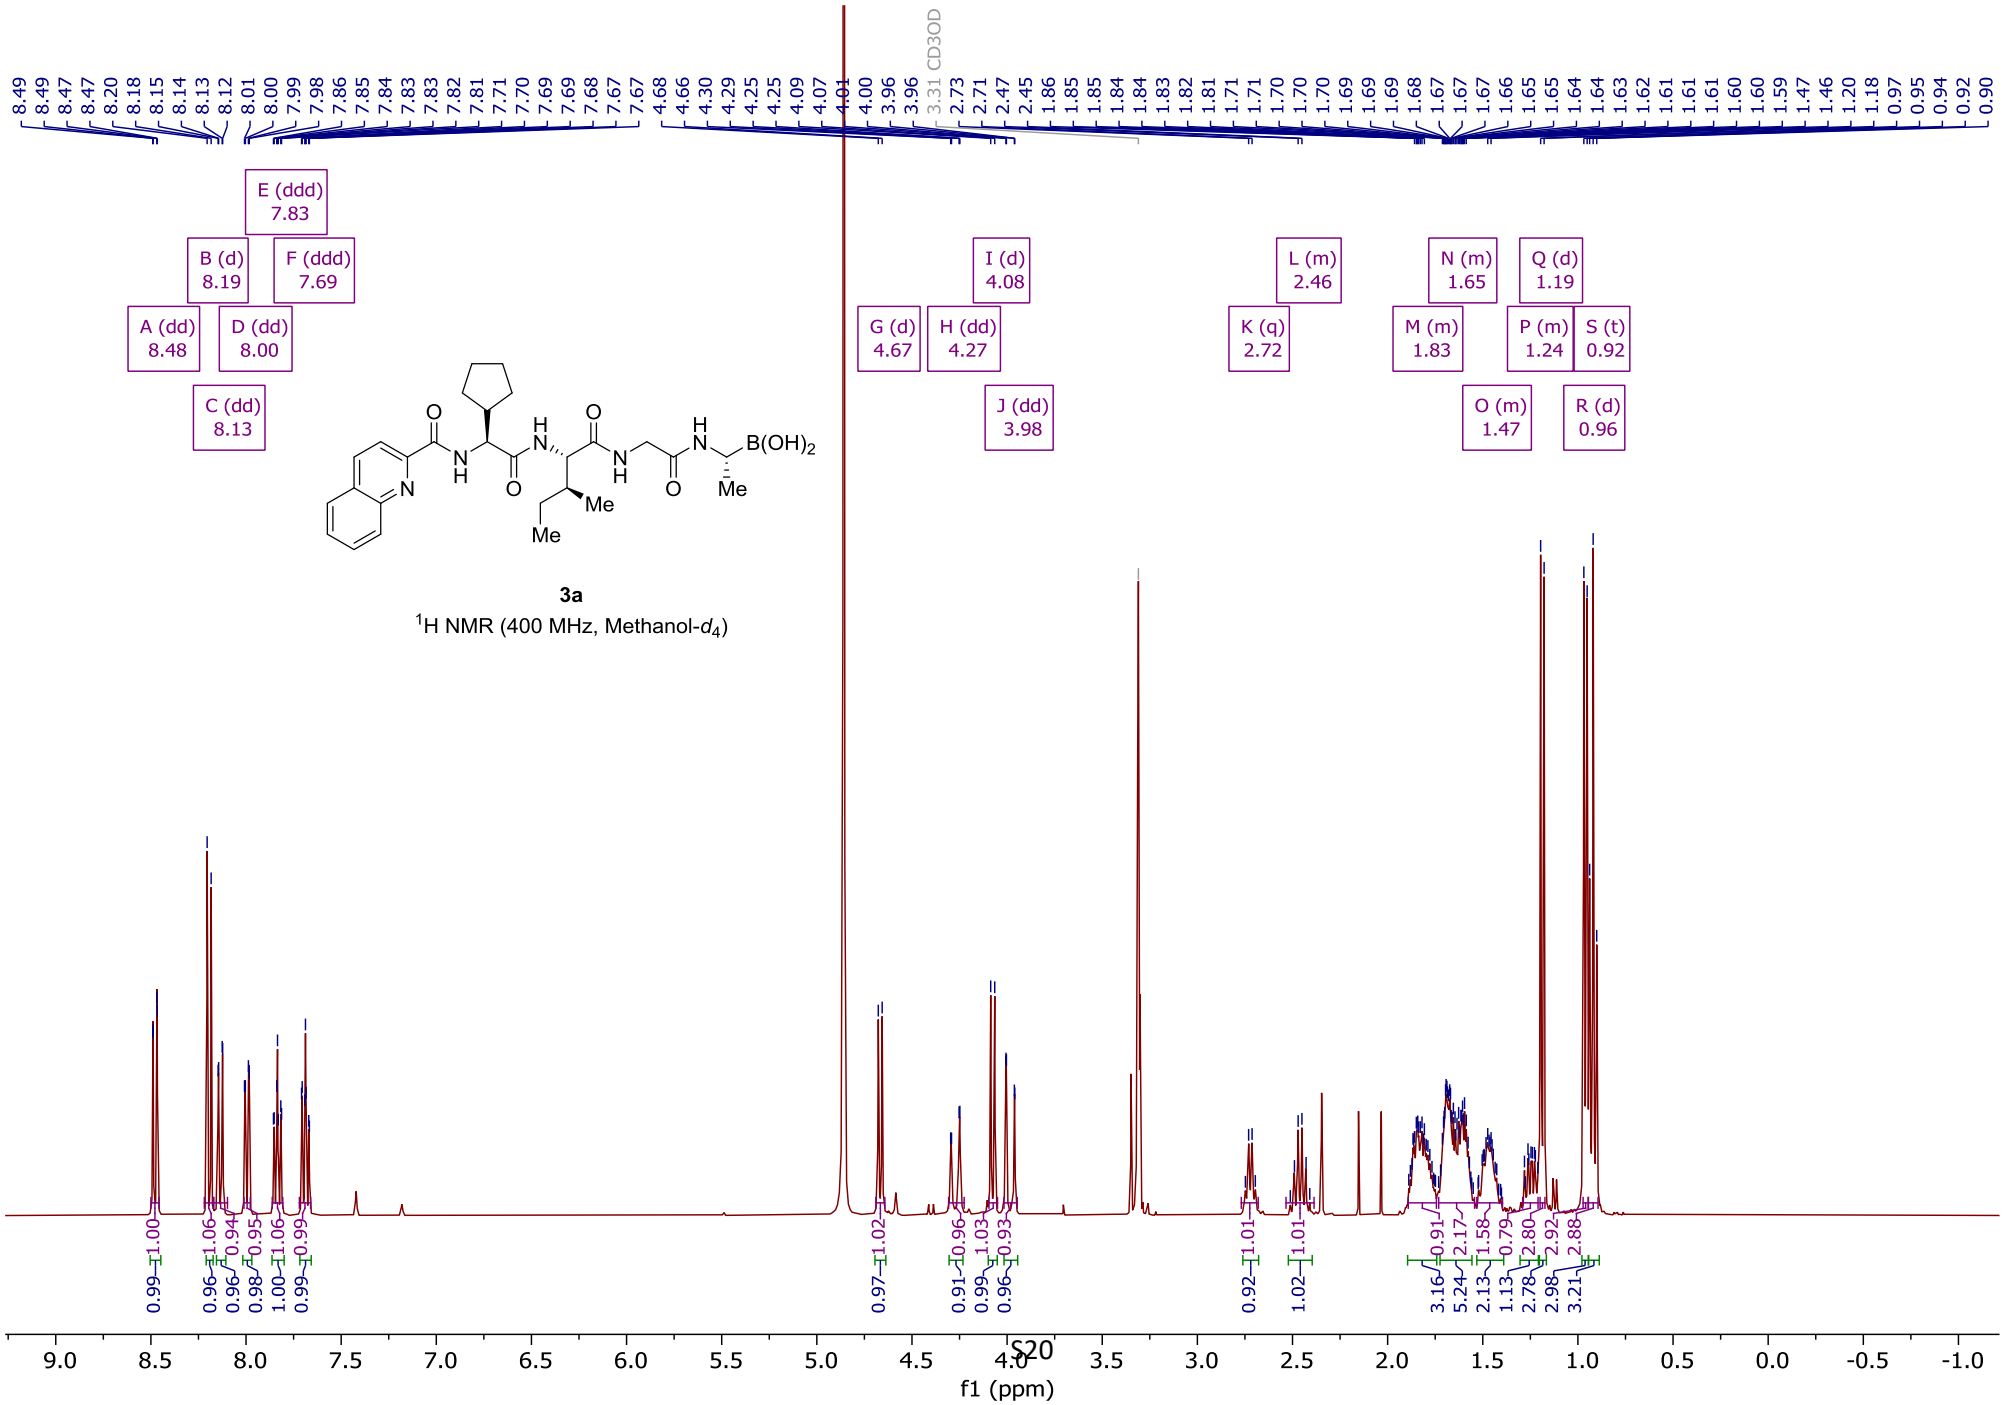

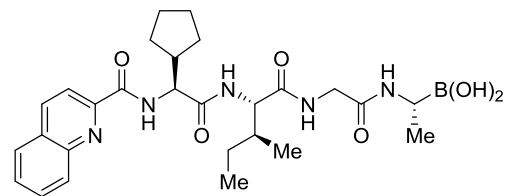

**3a**

<sup>13</sup>C NMR (101 MHz, Methanol-*d*<sub>4</sub>)

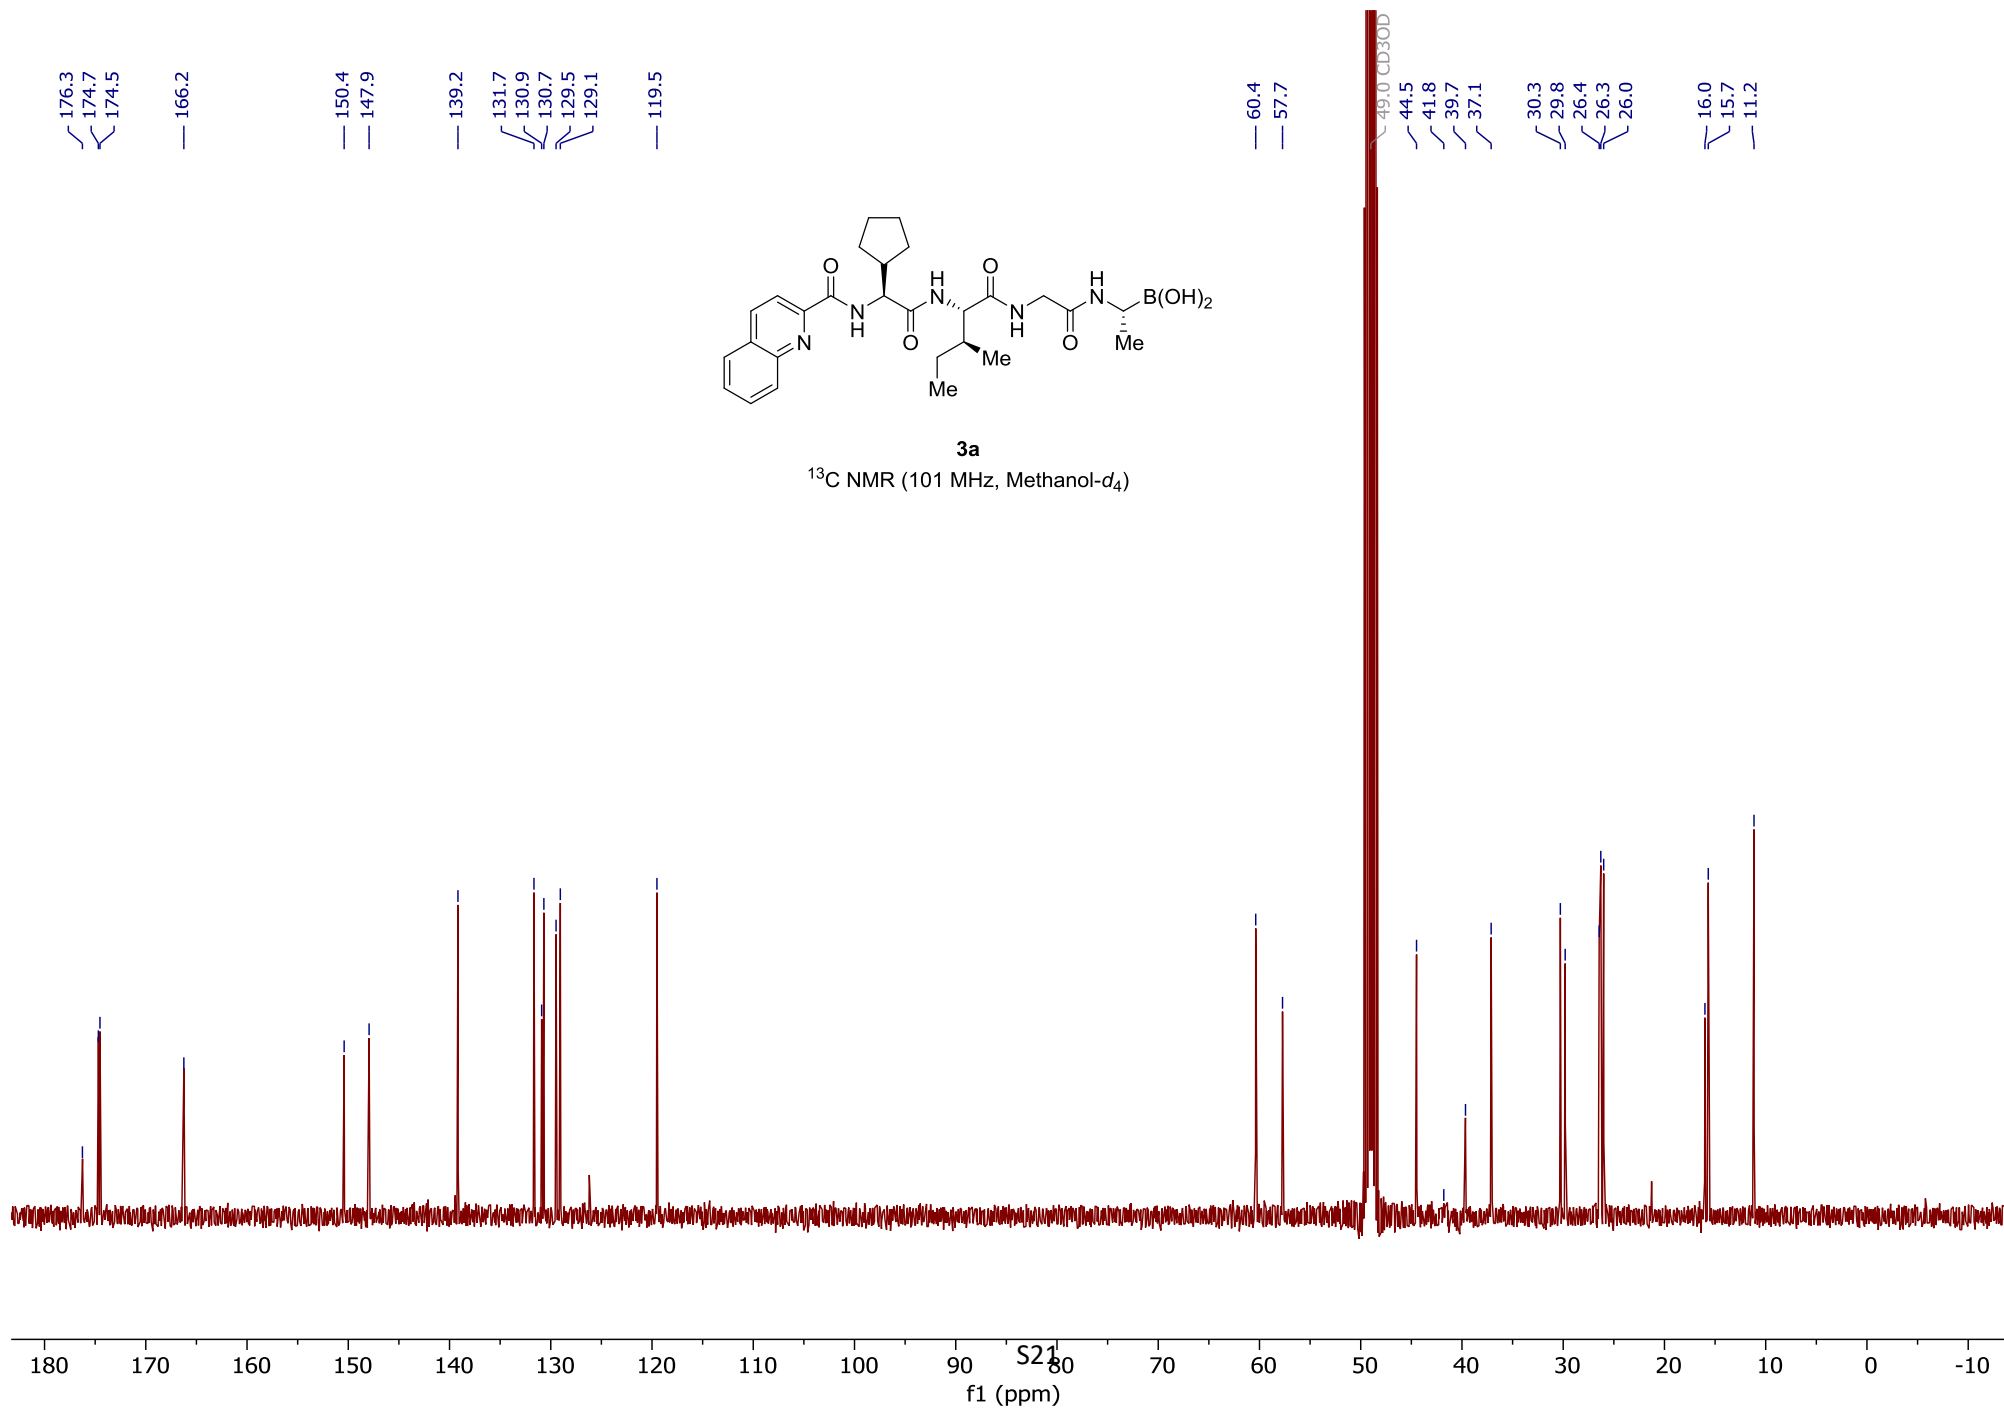

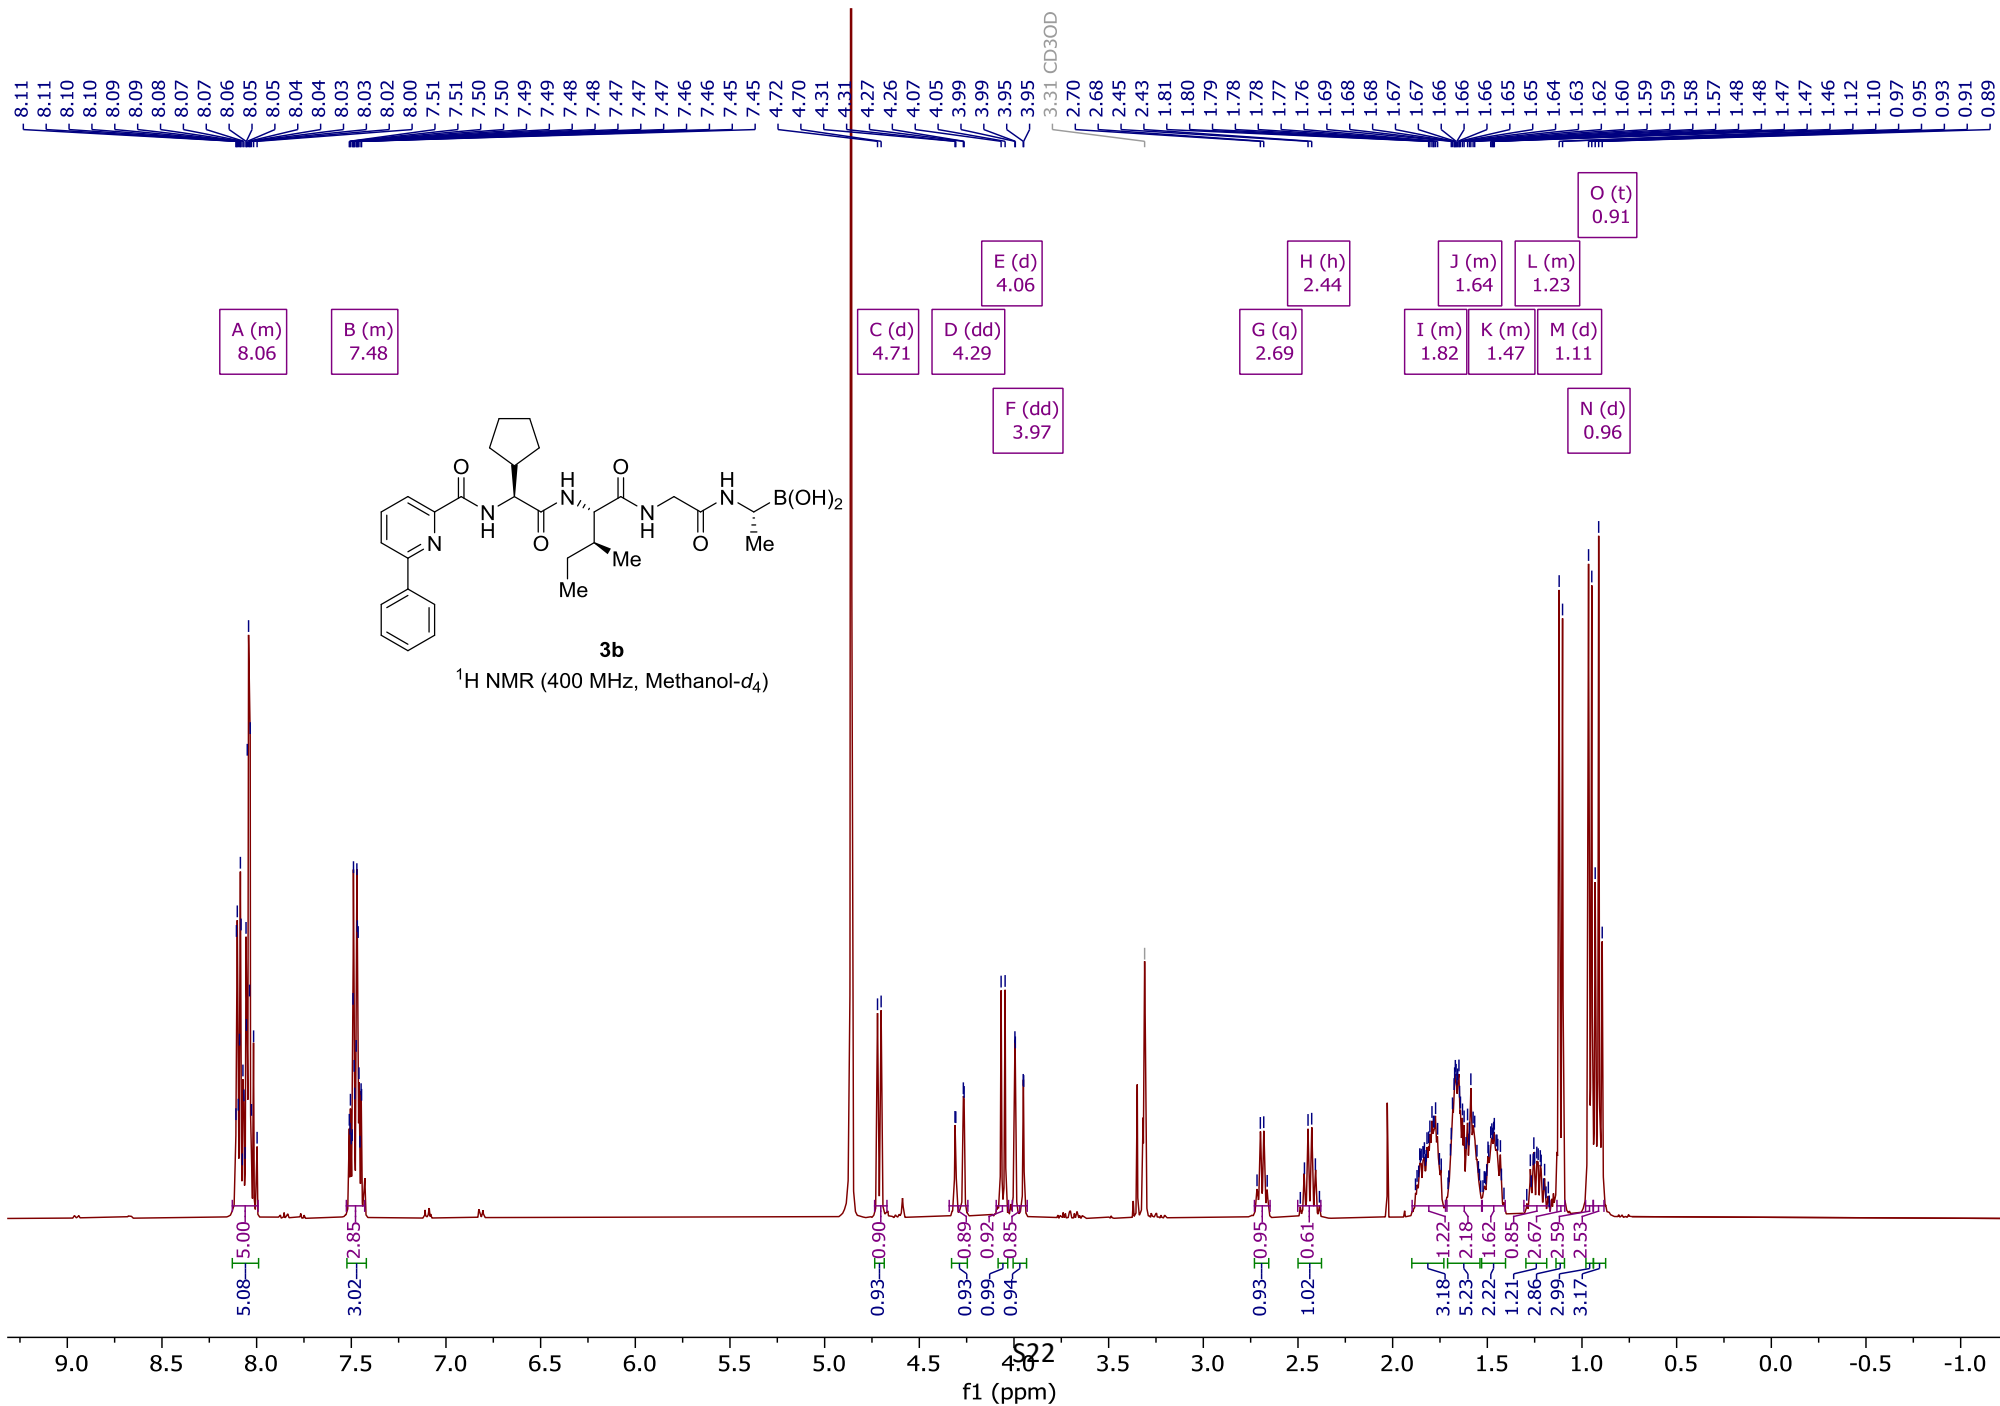

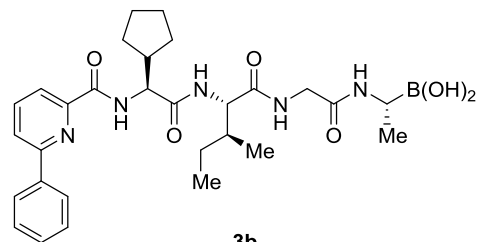

<sup>13</sup>C NMR (101 MHz, Methanol-d<sub>4</sub>)

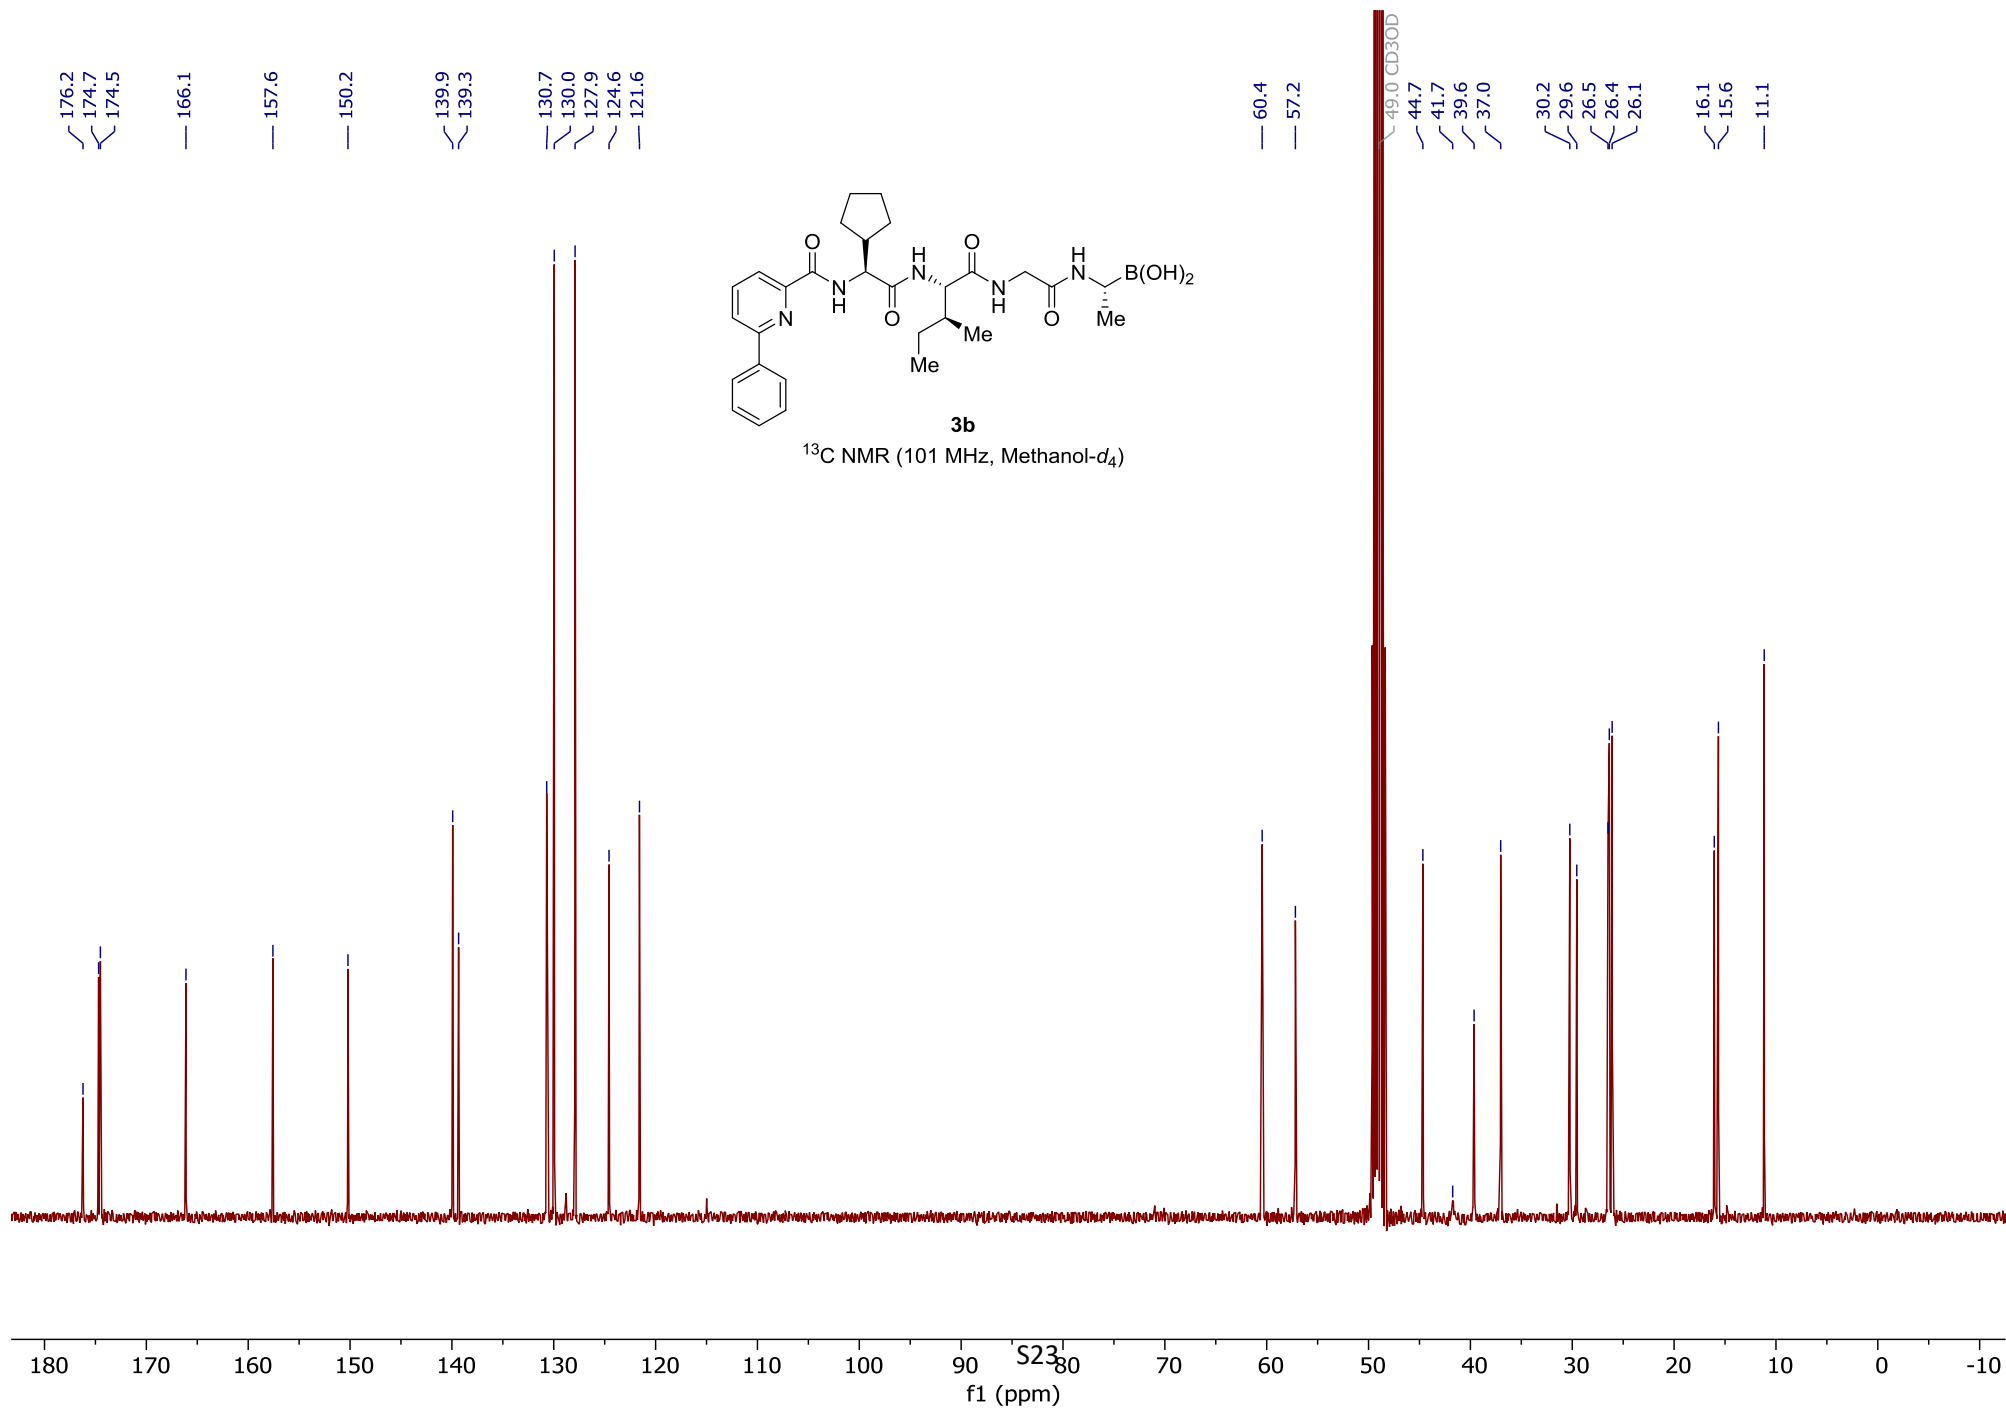

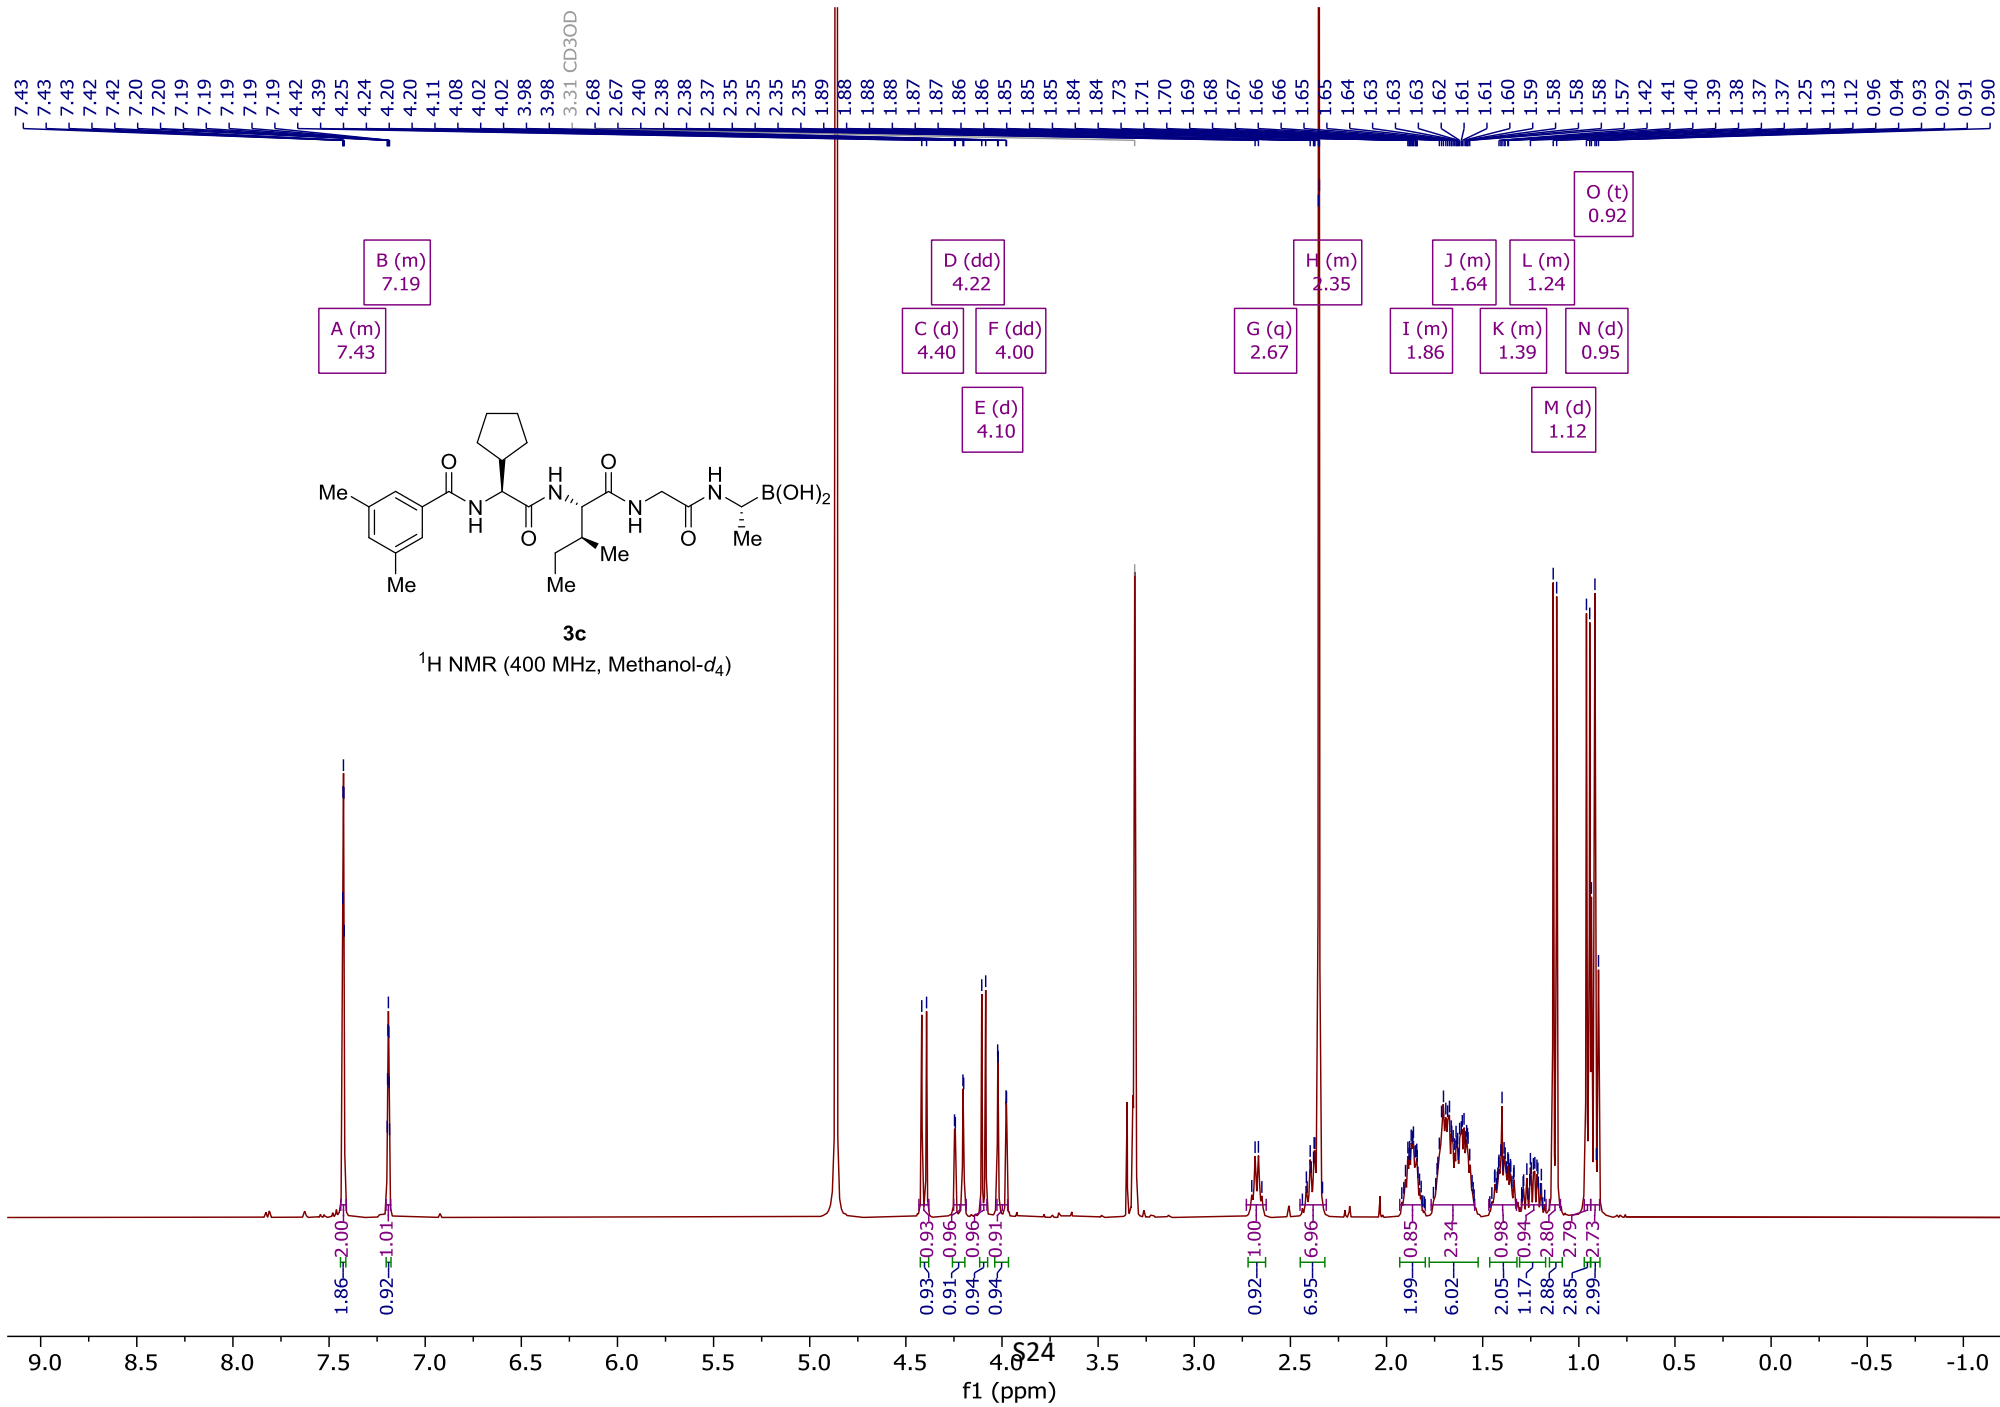



176.3  
175.0  
174.5  
170.8

139.4  
135.3  
134.3

126.2

60.0  
59.5

43.0  
41.9  
39.6  
37.4  
30.7  
30.5  
26.3  
26.3  
25.9  
21.3  
21.3  
21.2  
15.9  
15.7  
11.2

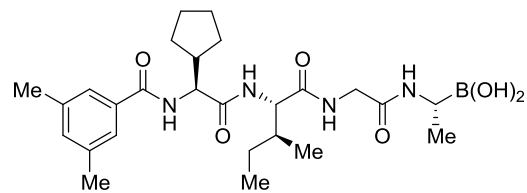

3c

<sup>13</sup>C NMR (101 MHz, Methanol-d<sub>4</sub>)

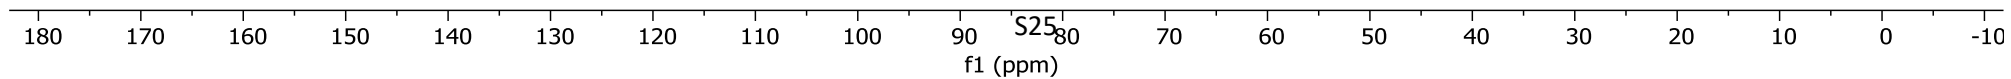

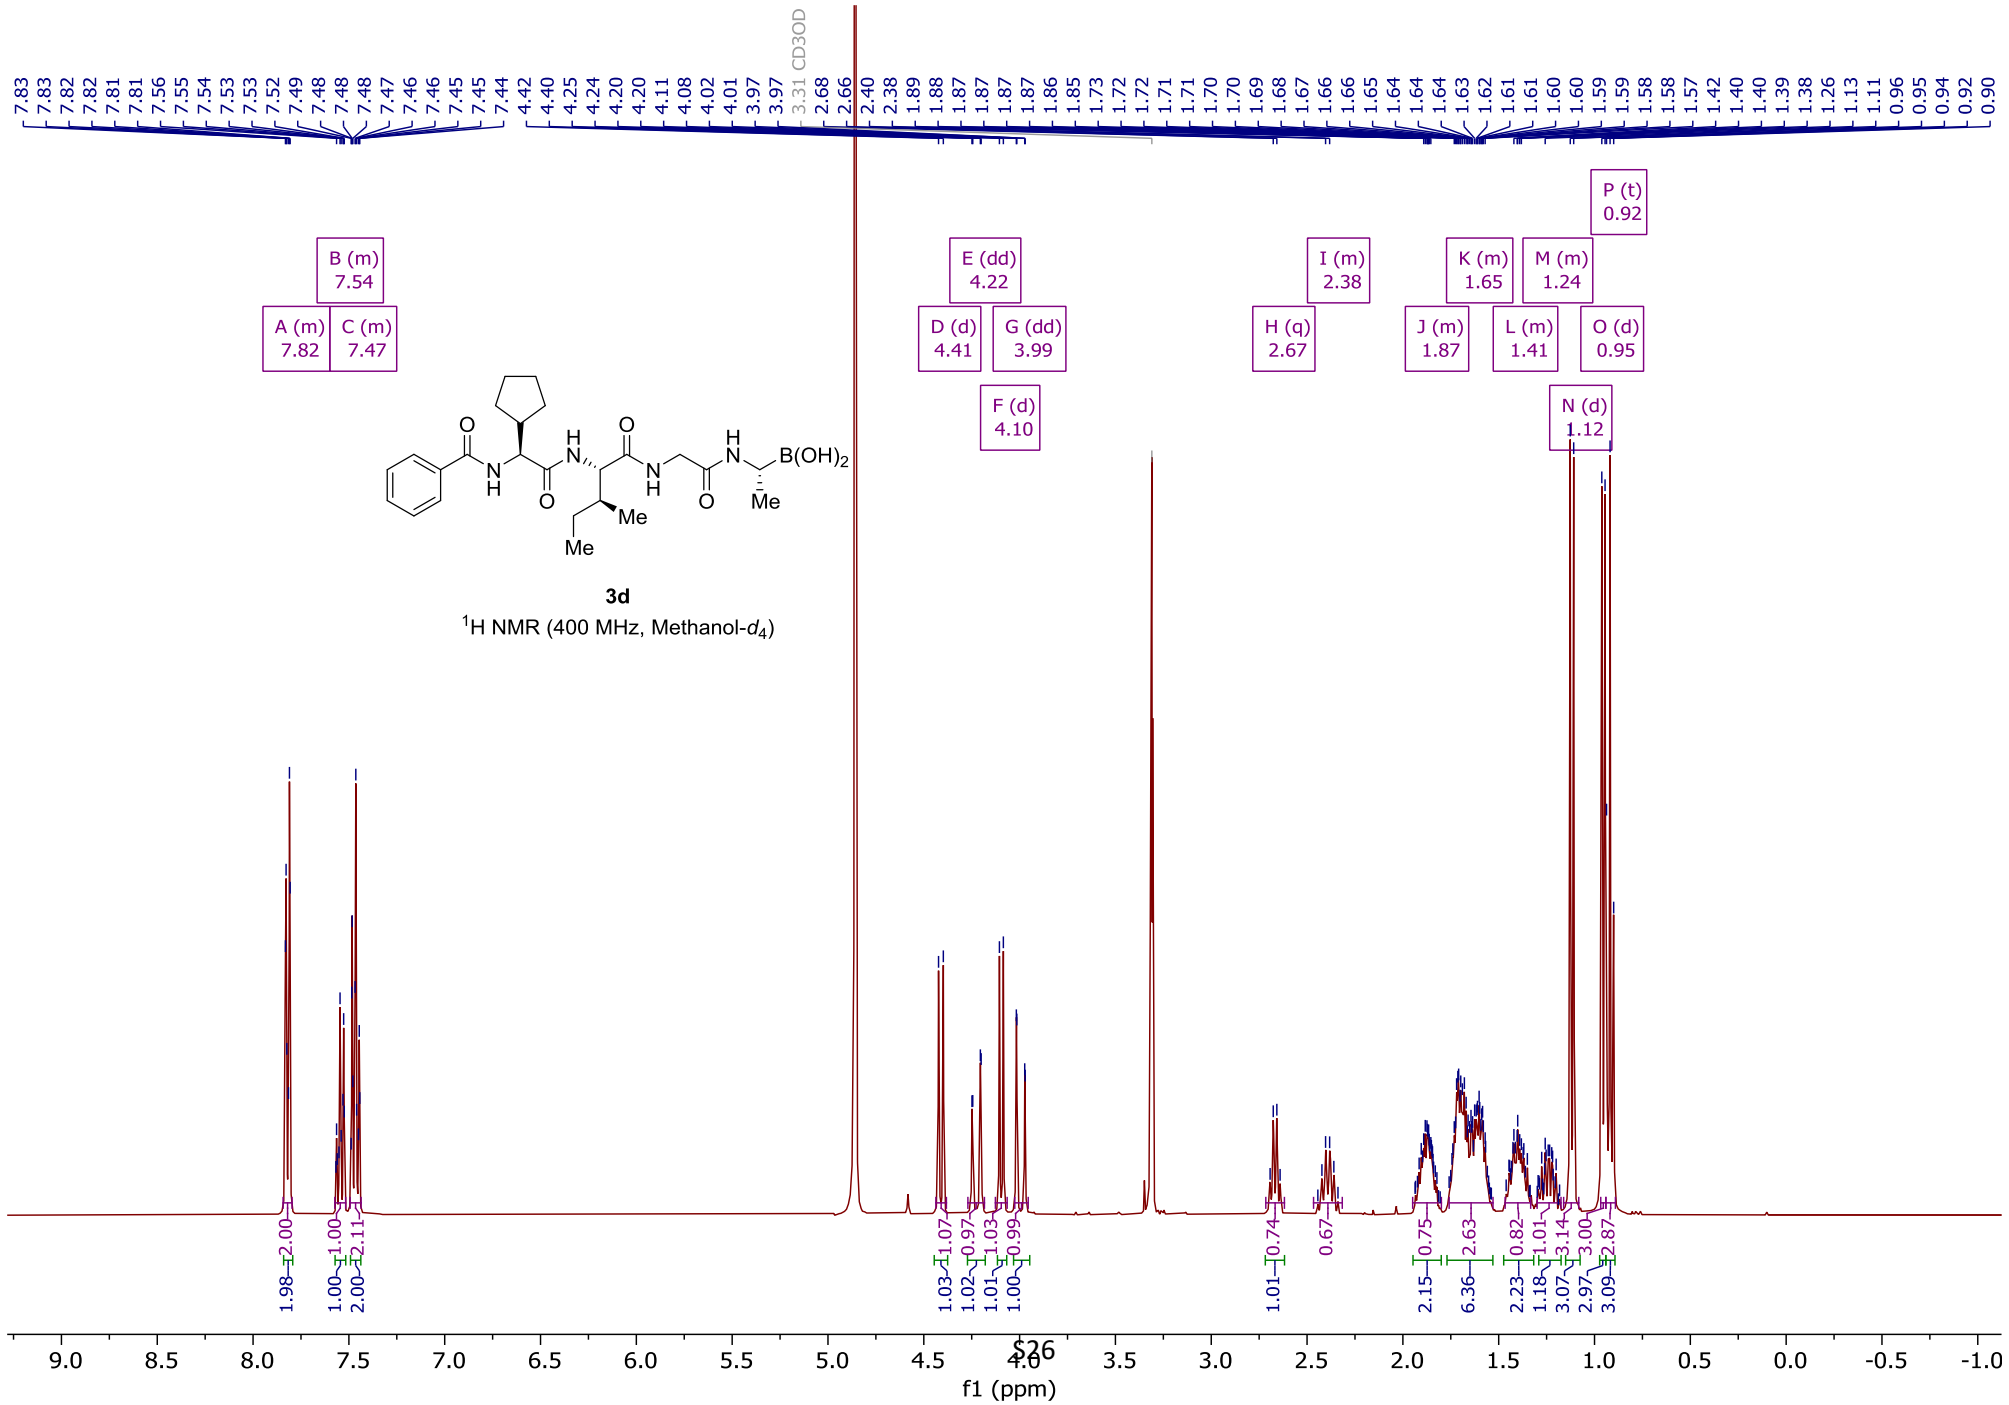

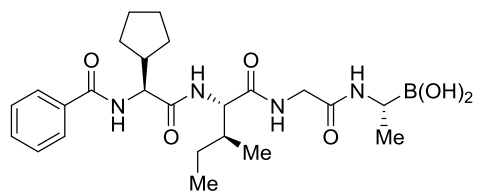

**3d**

$^{13}\text{C}$  NMR (101 MHz, Methanol- $d_4$ )

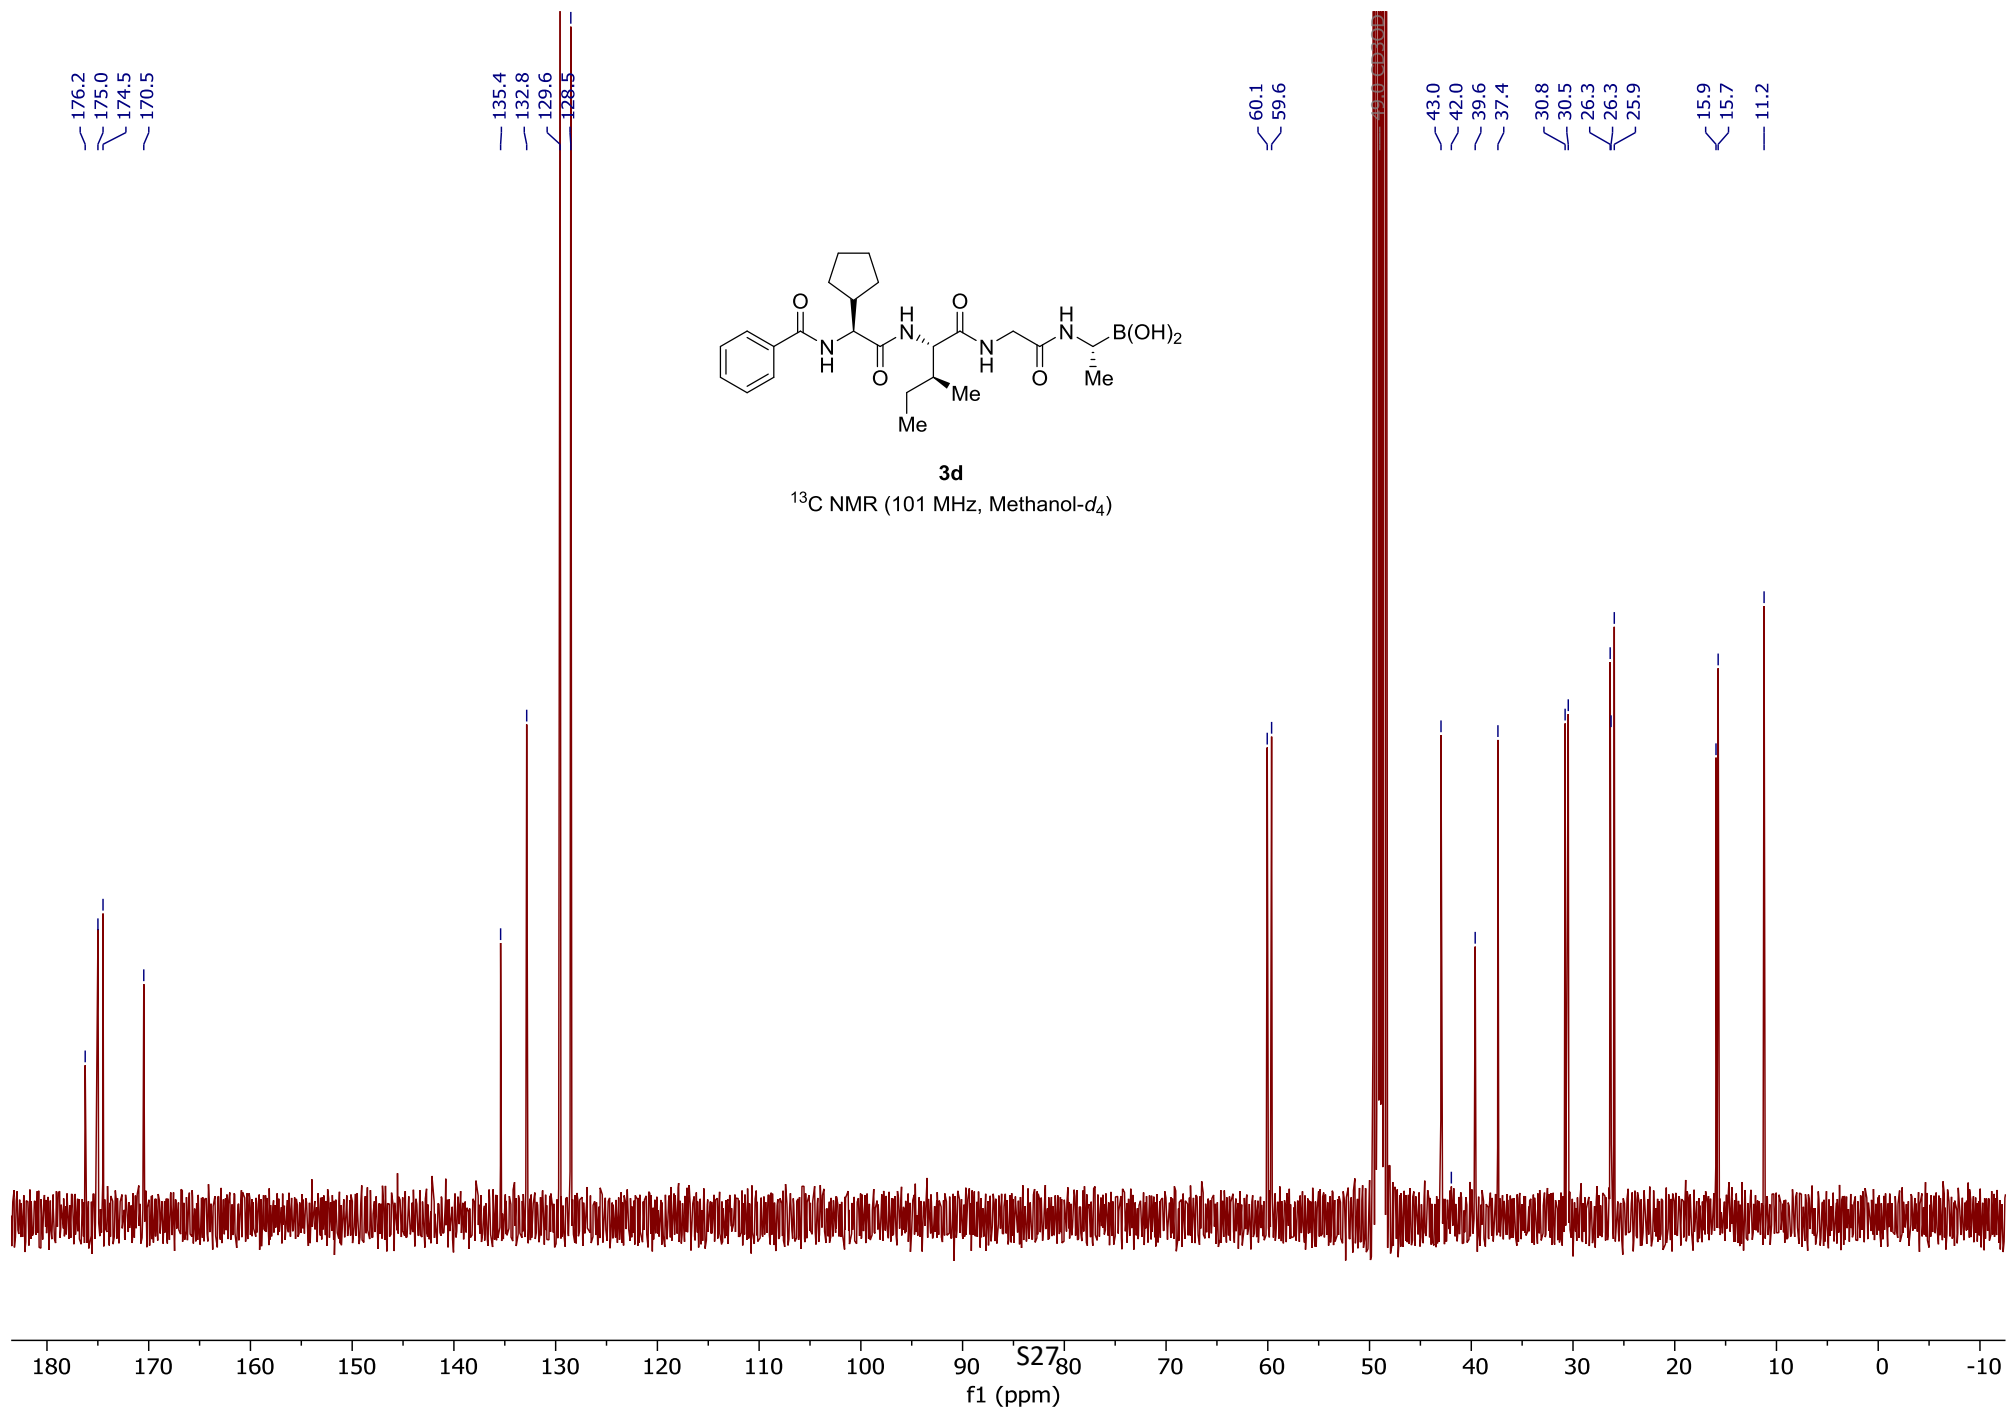

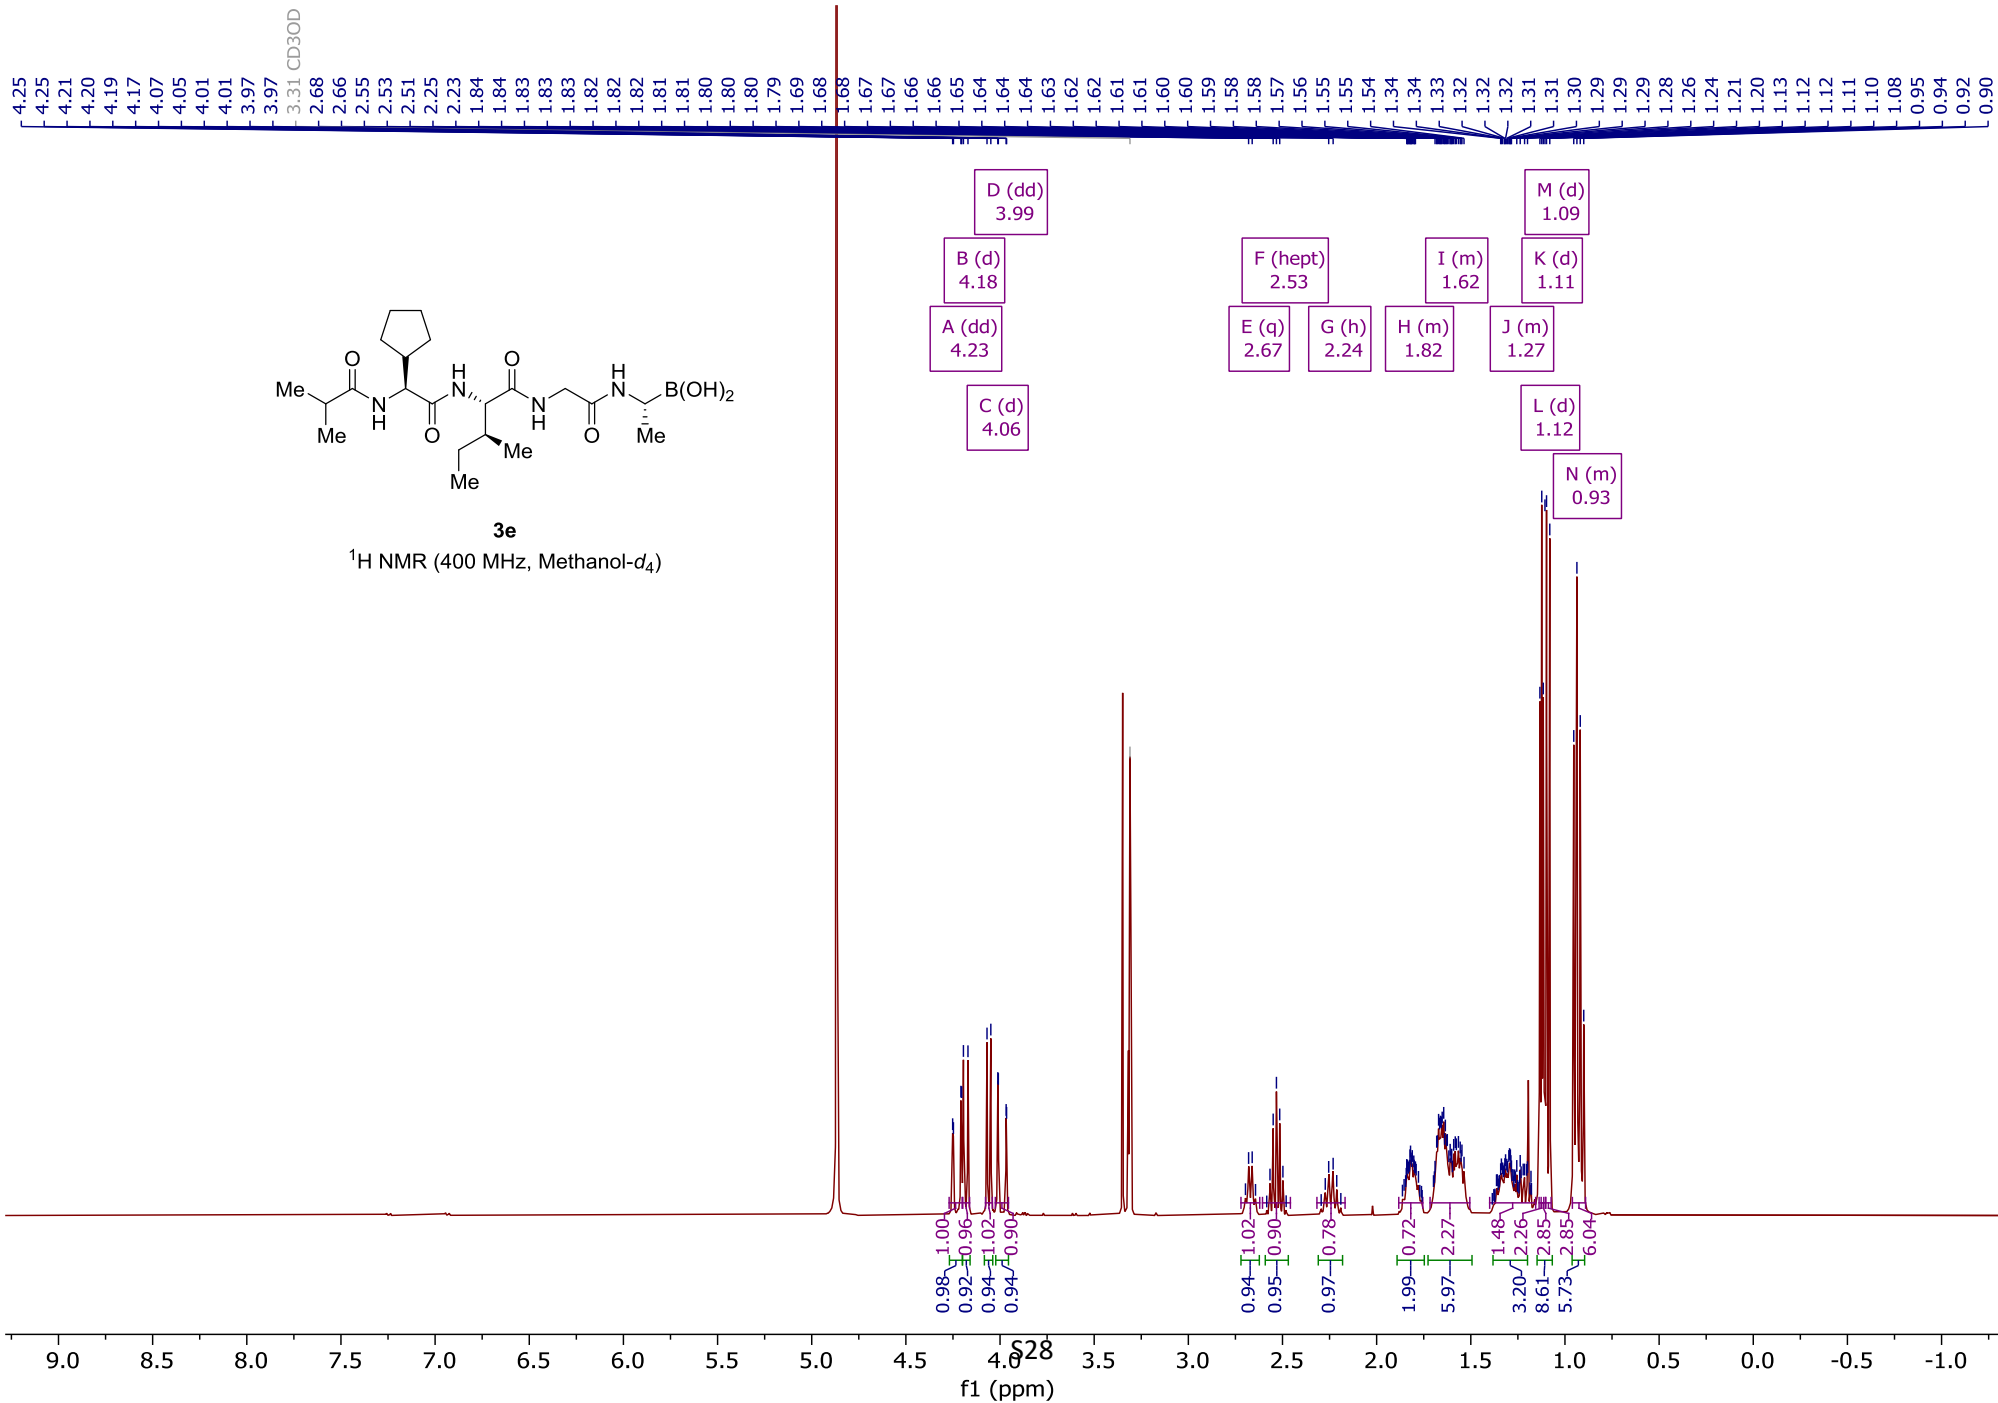

180.2  
176.4  
175.0  
174.5

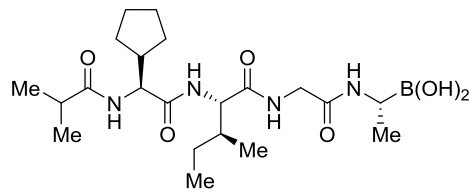

**3e**

$^{13}\text{C}$  NMR (101 MHz, Methanol- $d_4$ )

59.9  
58.6

43.0  
42.0  
39.6  
37.4  
35.8  
30.4  
30.3  
26.3  
26.2  
25.9  
20.1  
19.7  
15.9  
15.7  
11.2

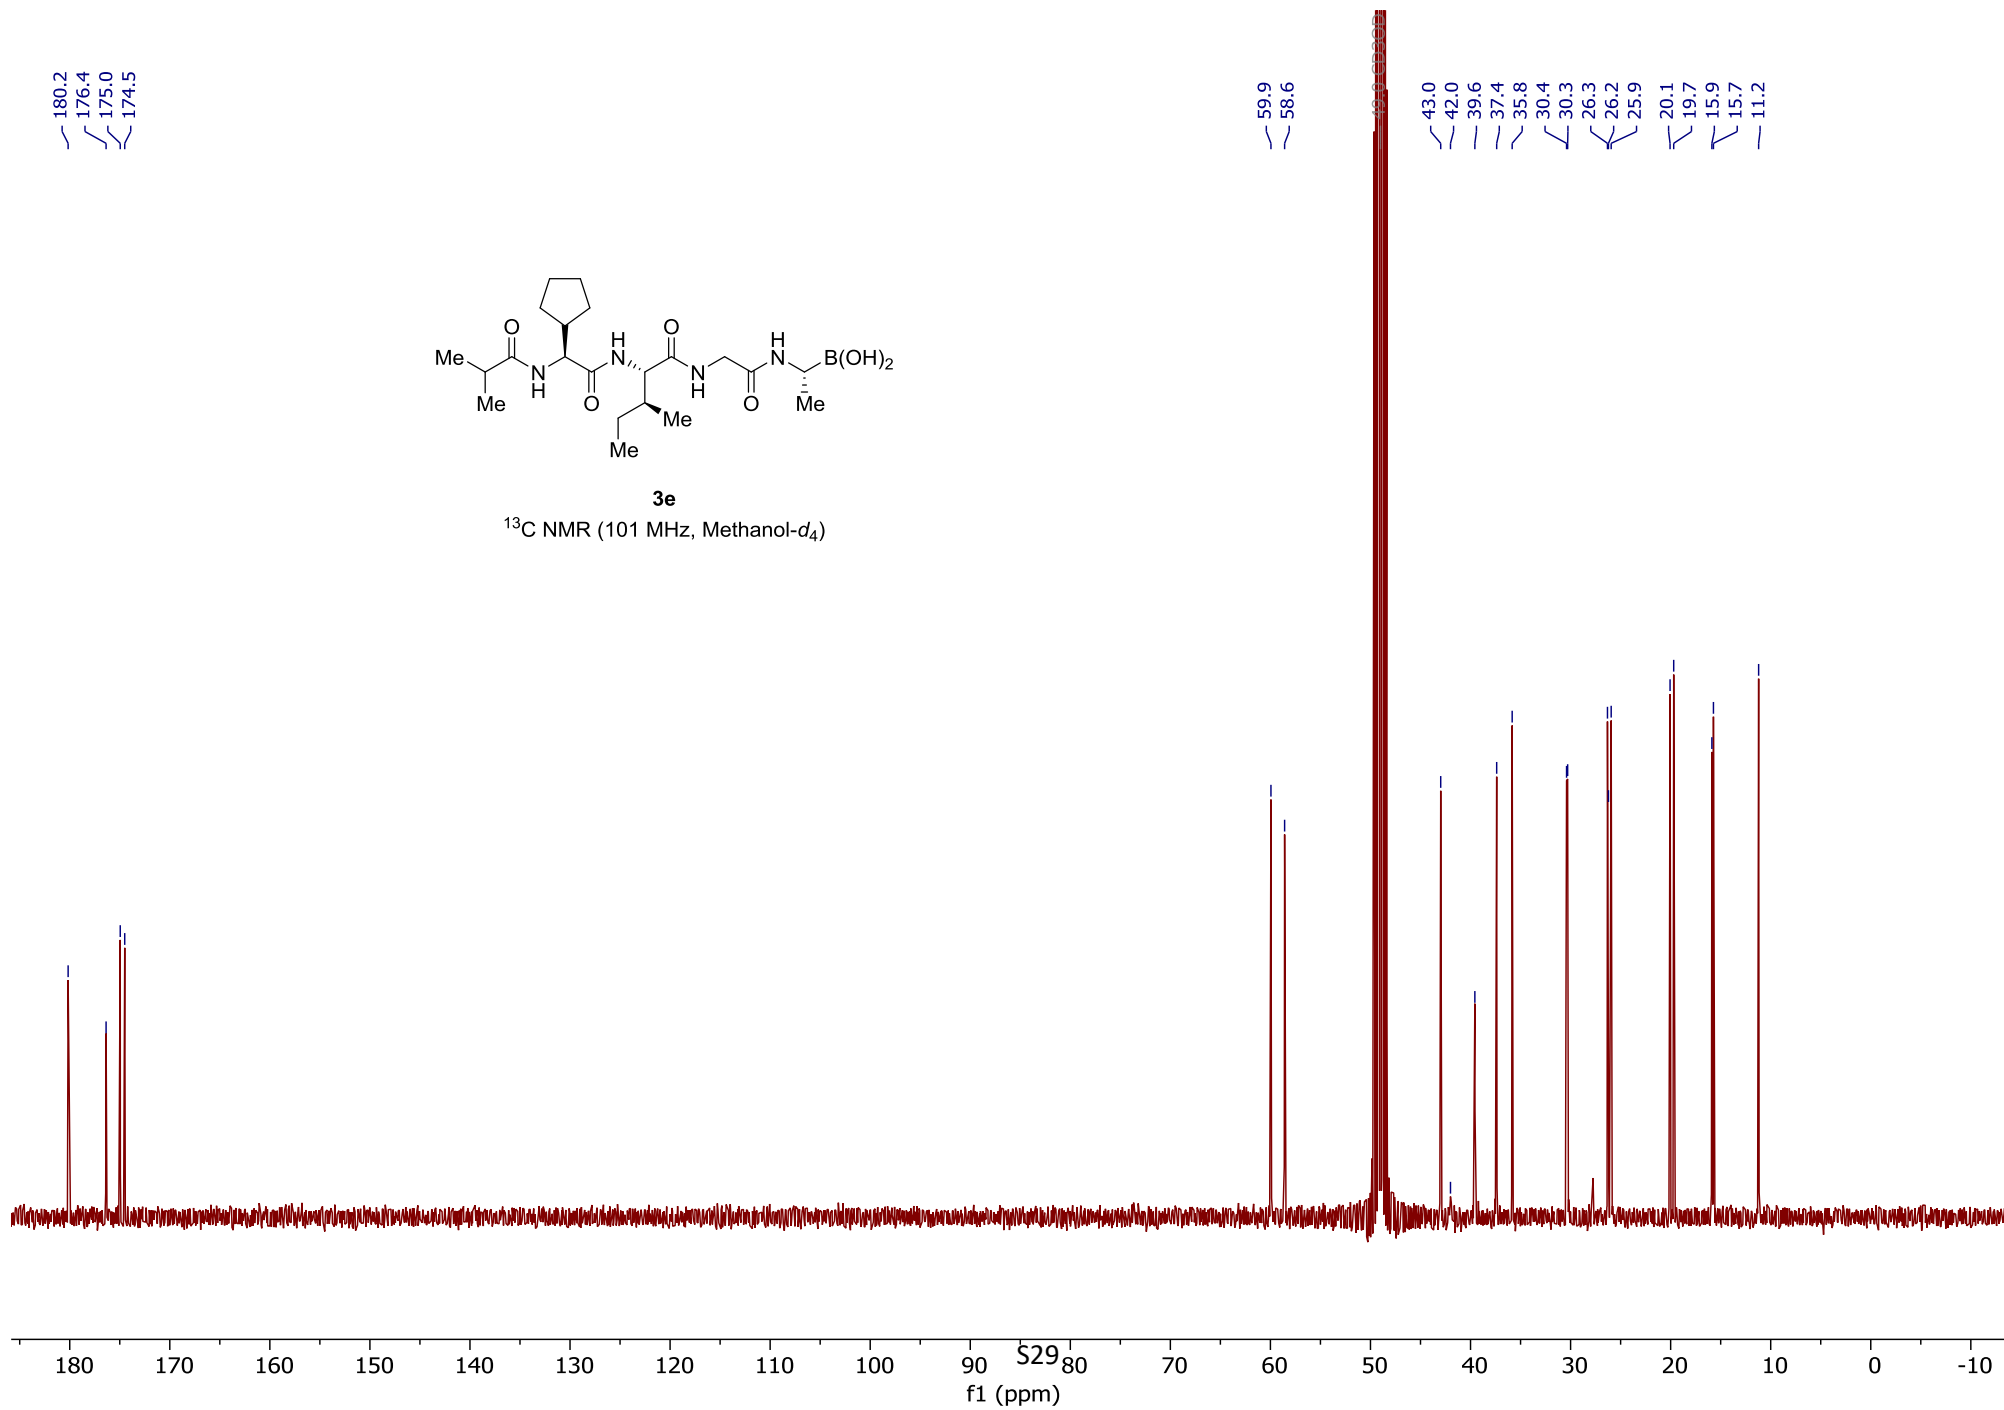

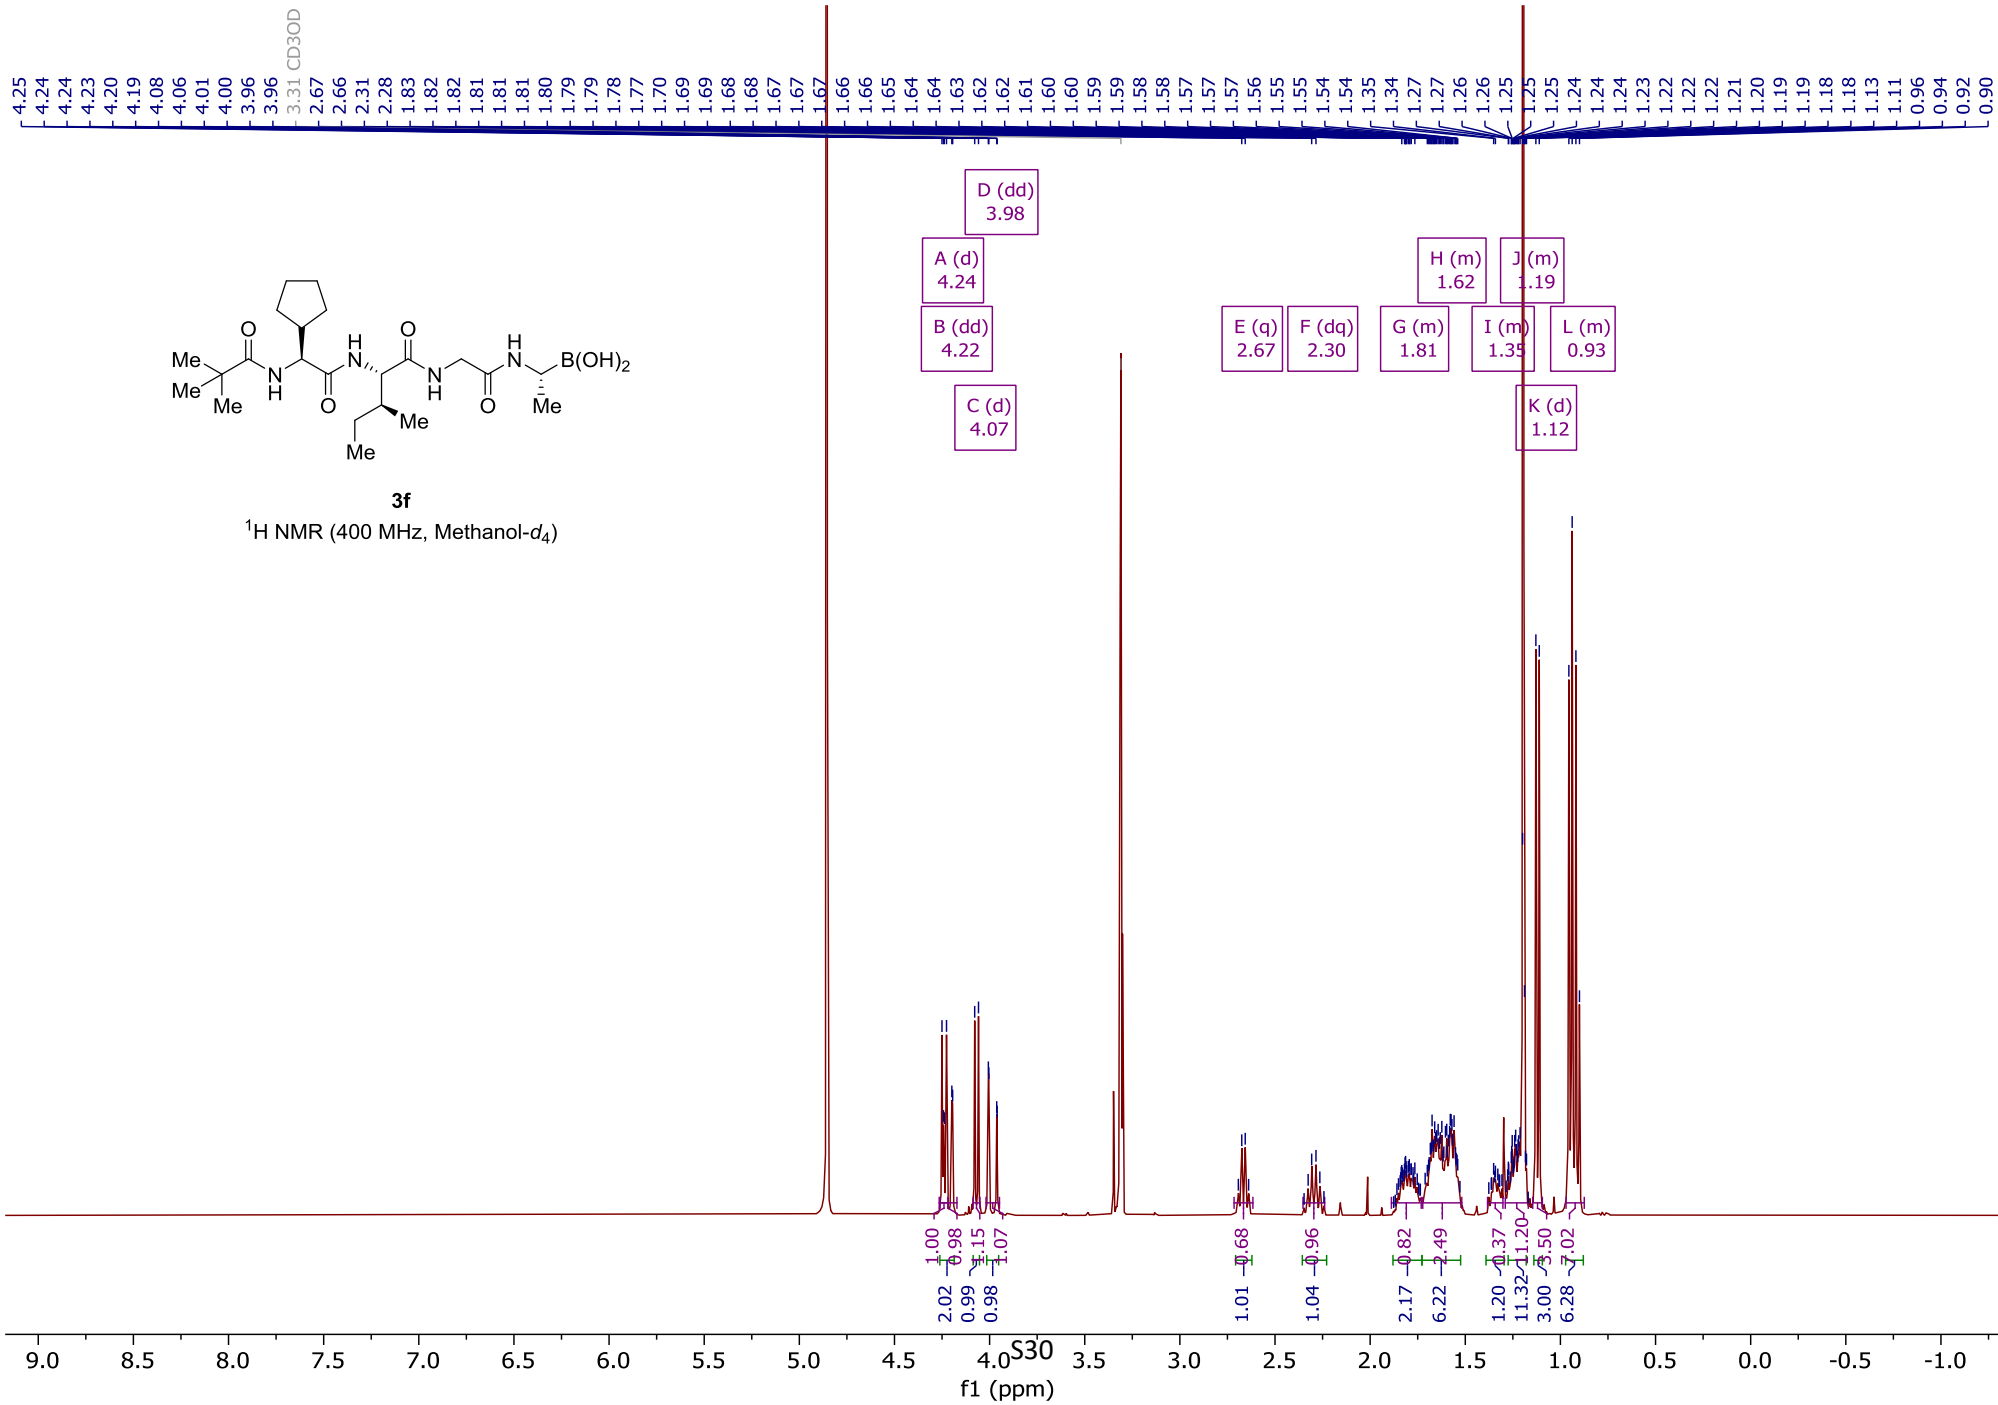

181.1  
176.3  
174.9  
174.4

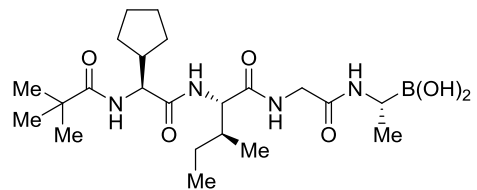

**3f**

<sup>13</sup>C NMR (101 MHz, Methanol-d<sub>4</sub>)

59.9  
58.6

49.0  
48.9  
48.8

43.1  
41.9  
39.8  
39.6  
37.5  
30.4  
30.3  
27.8  
26.3  
26.2  
25.9

15.9  
15.7  
11.2

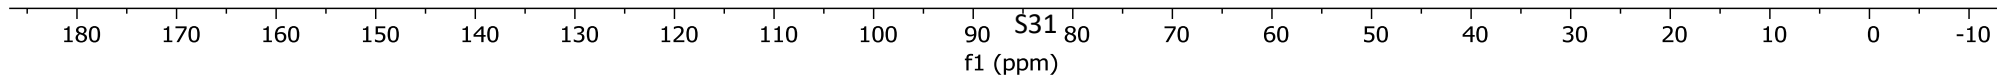

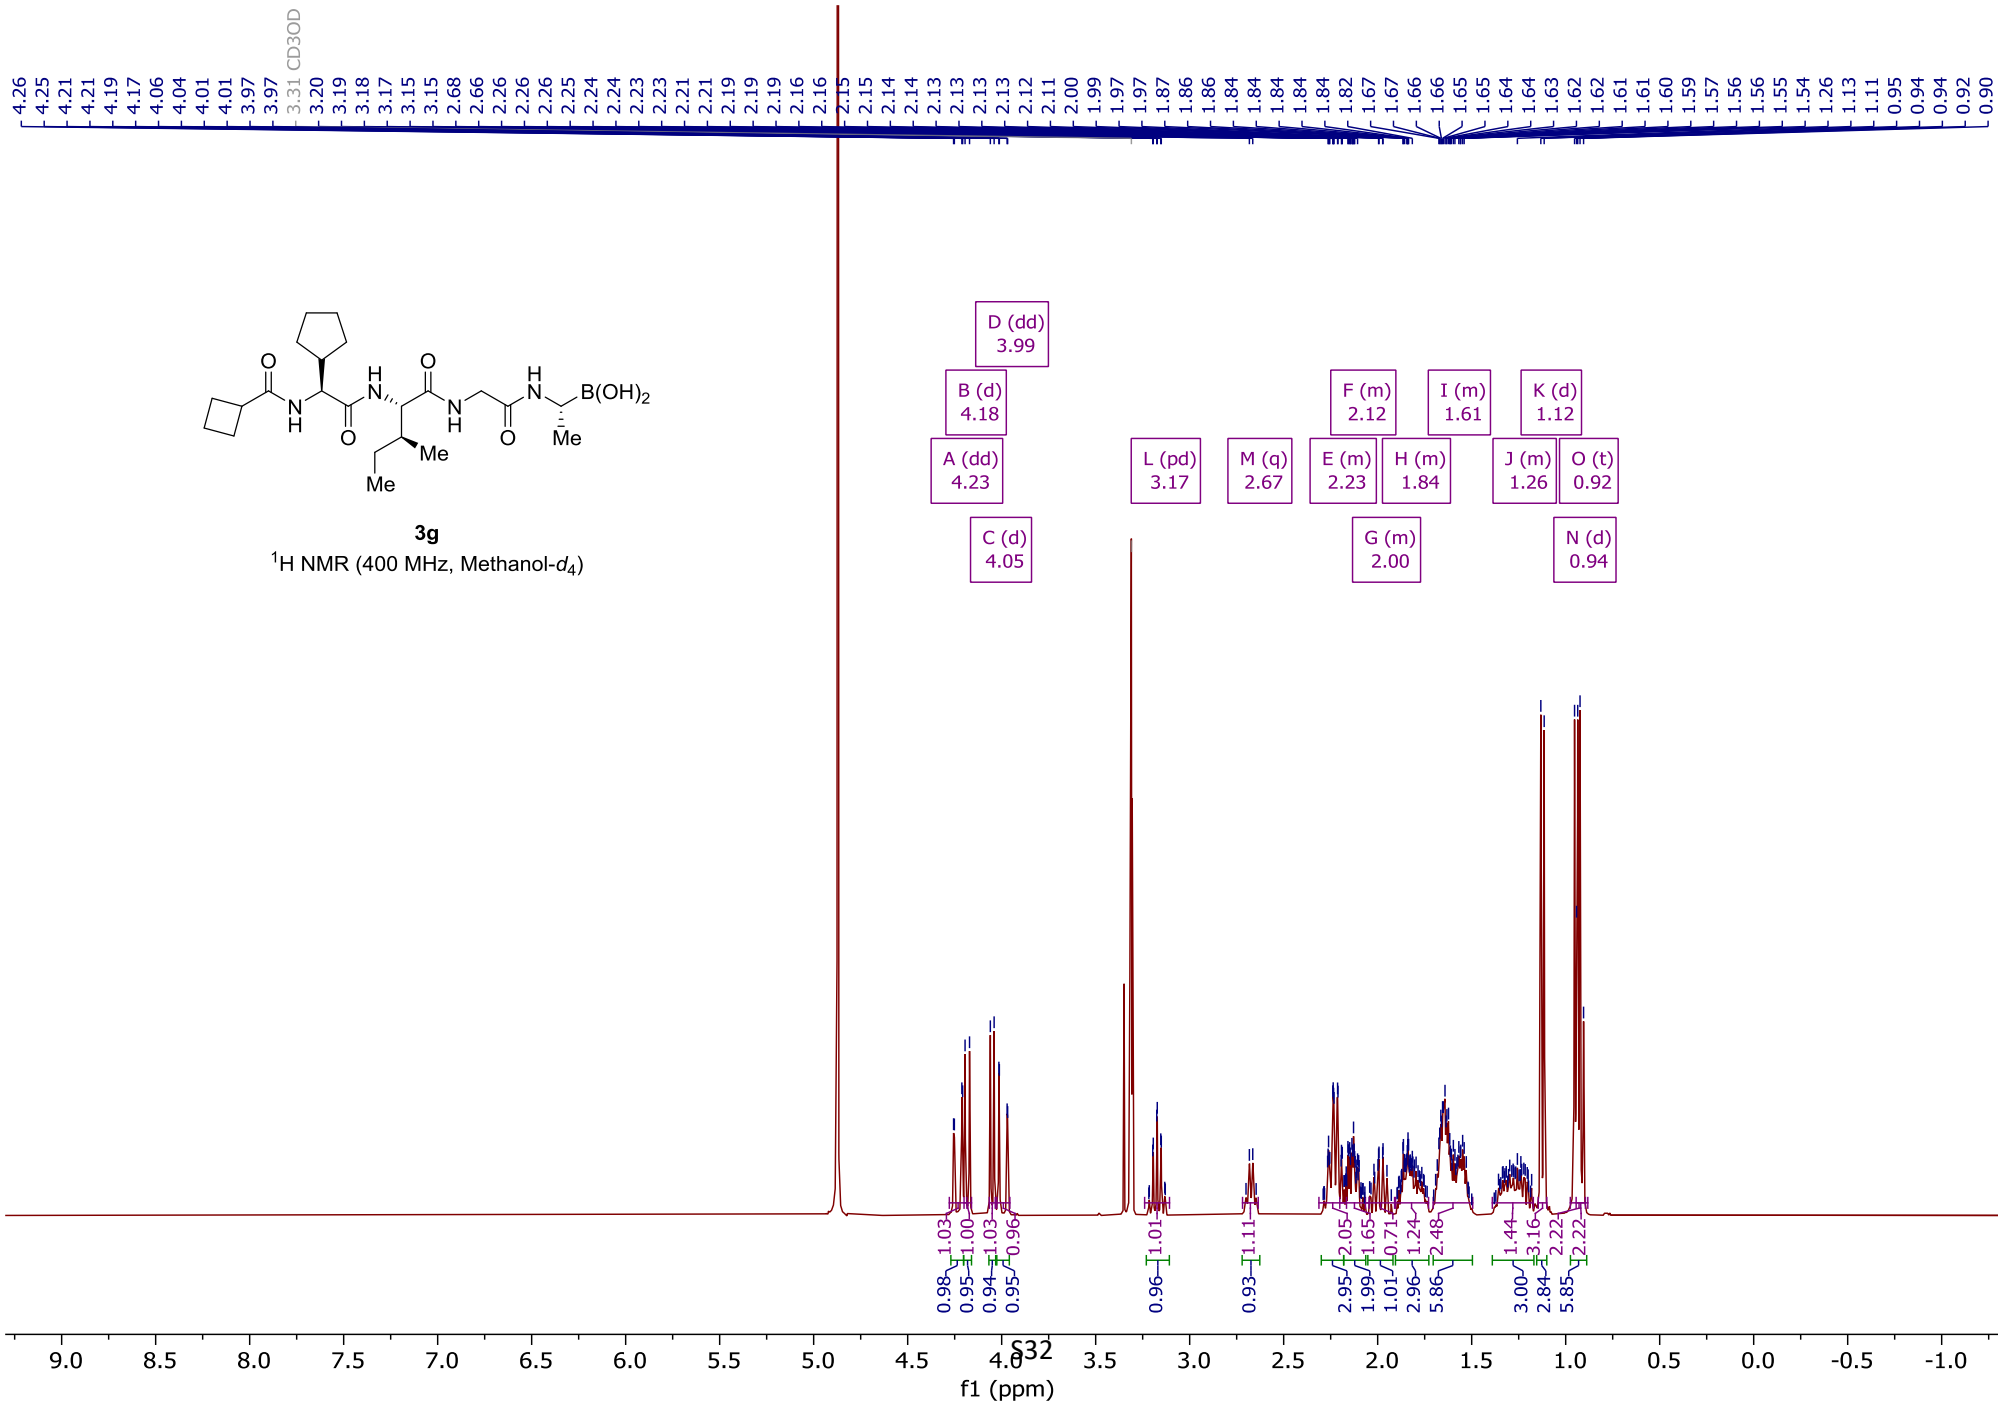



177.7  
176.4  
175.0  
174.5

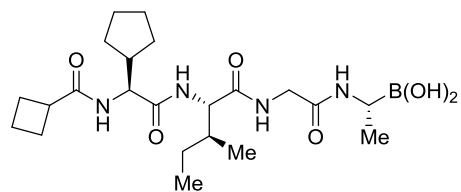

**3g**

<sup>13</sup>C NMR (101 MHz, Methanol-d<sub>4</sub>)

60.0  
58.7

43.0  
42.1  
40.4  
39.6  
37.4  
30.4  
30.3  
26.3  
26.2  
26.0  
25.9  
19.1  
15.9  
15.7  
11.2

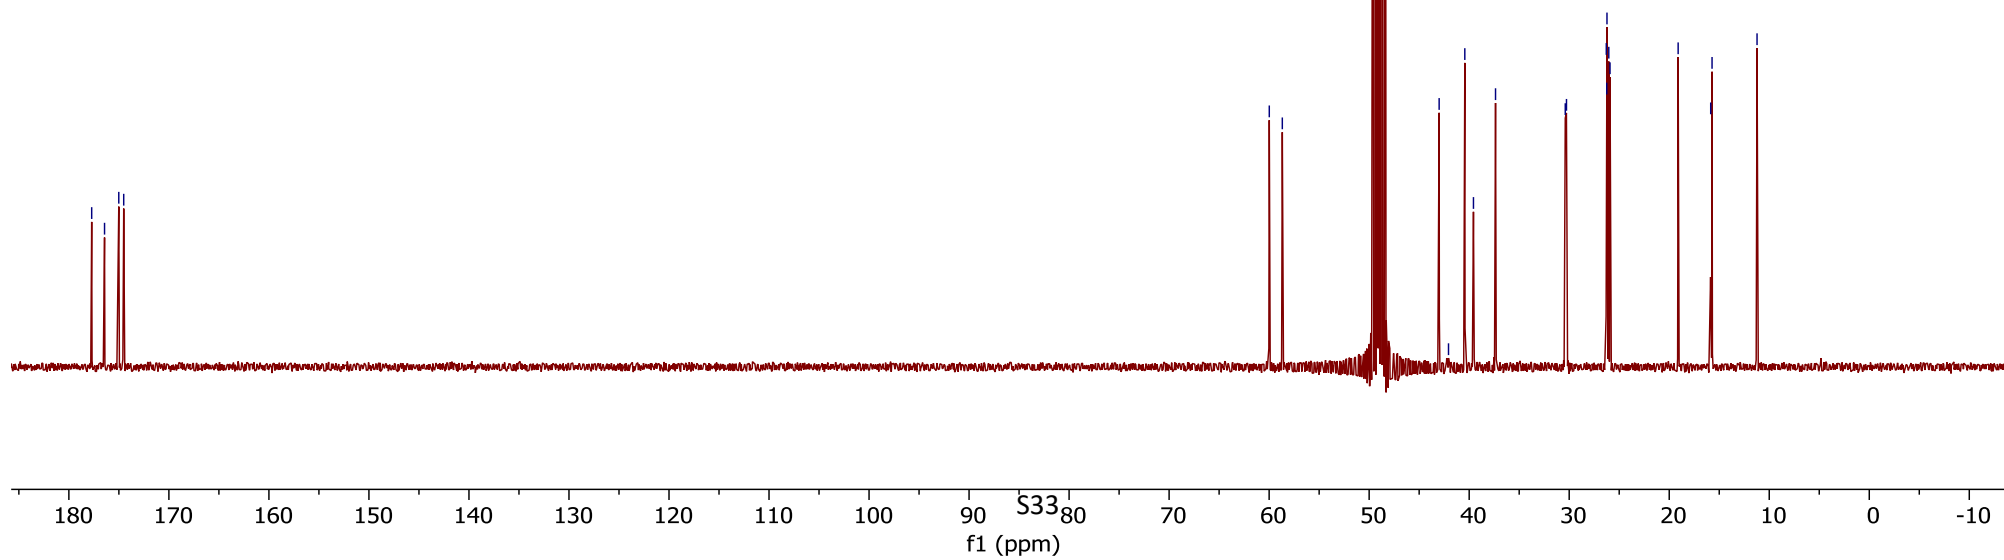

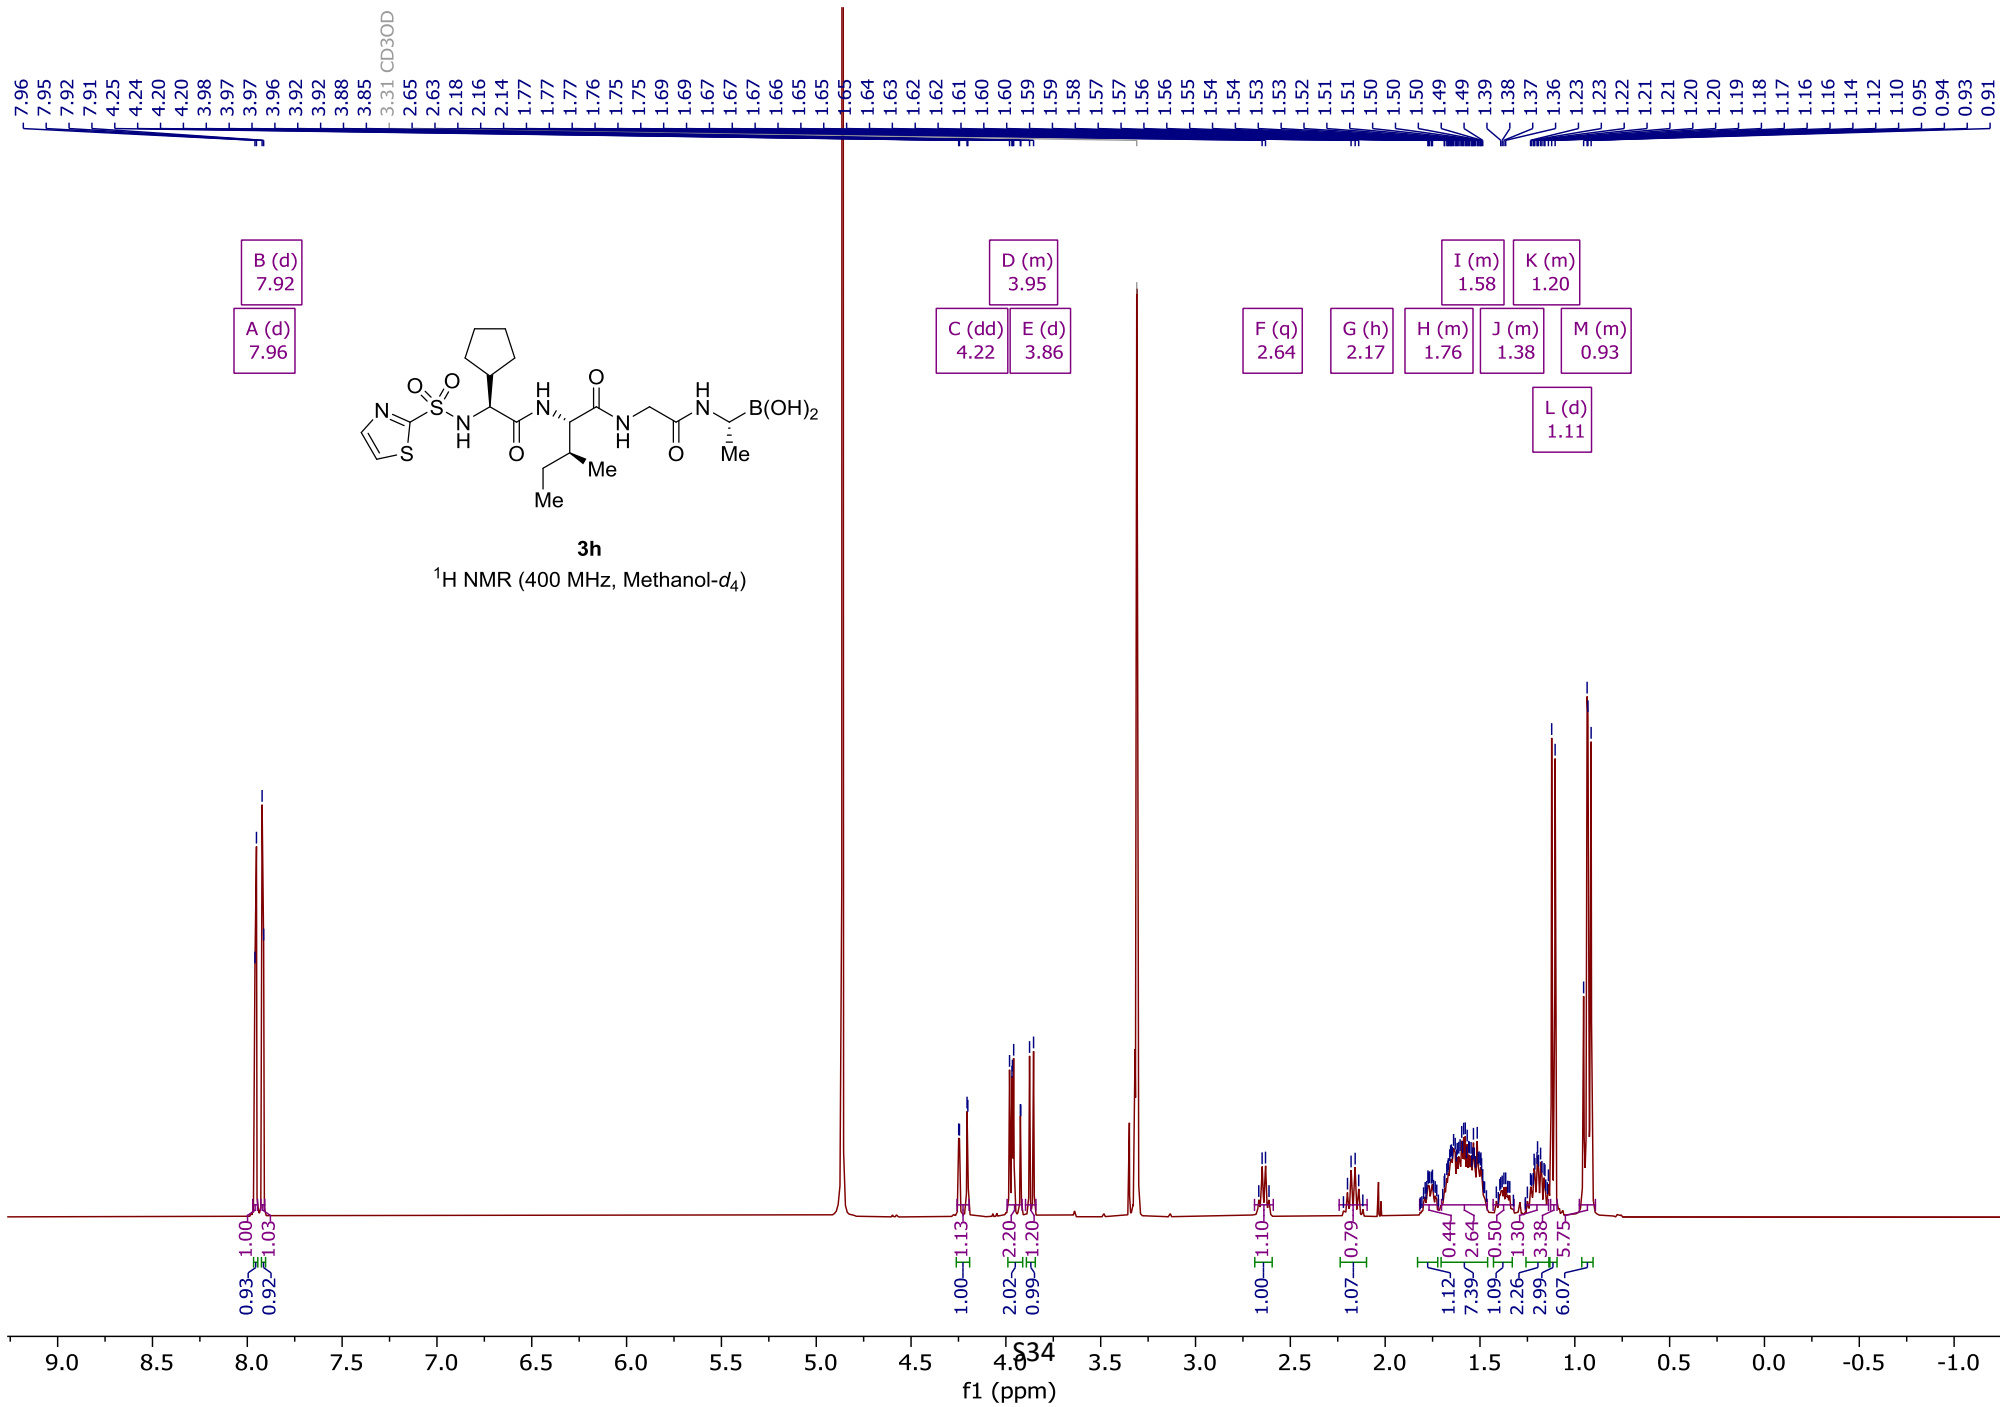

176.3  
174.4  
174.1  
168.0

145.1

126.4

61.6  
60.3

44.1  
42.0  
39.6  
37.1

29.9  
29.9  
26.5  
26.3  
25.8

15.9  
15.6  
11.3

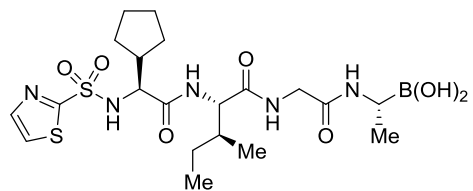

**3h**

<sup>13</sup>C NMR (101 MHz, Methanol-d<sub>4</sub>)

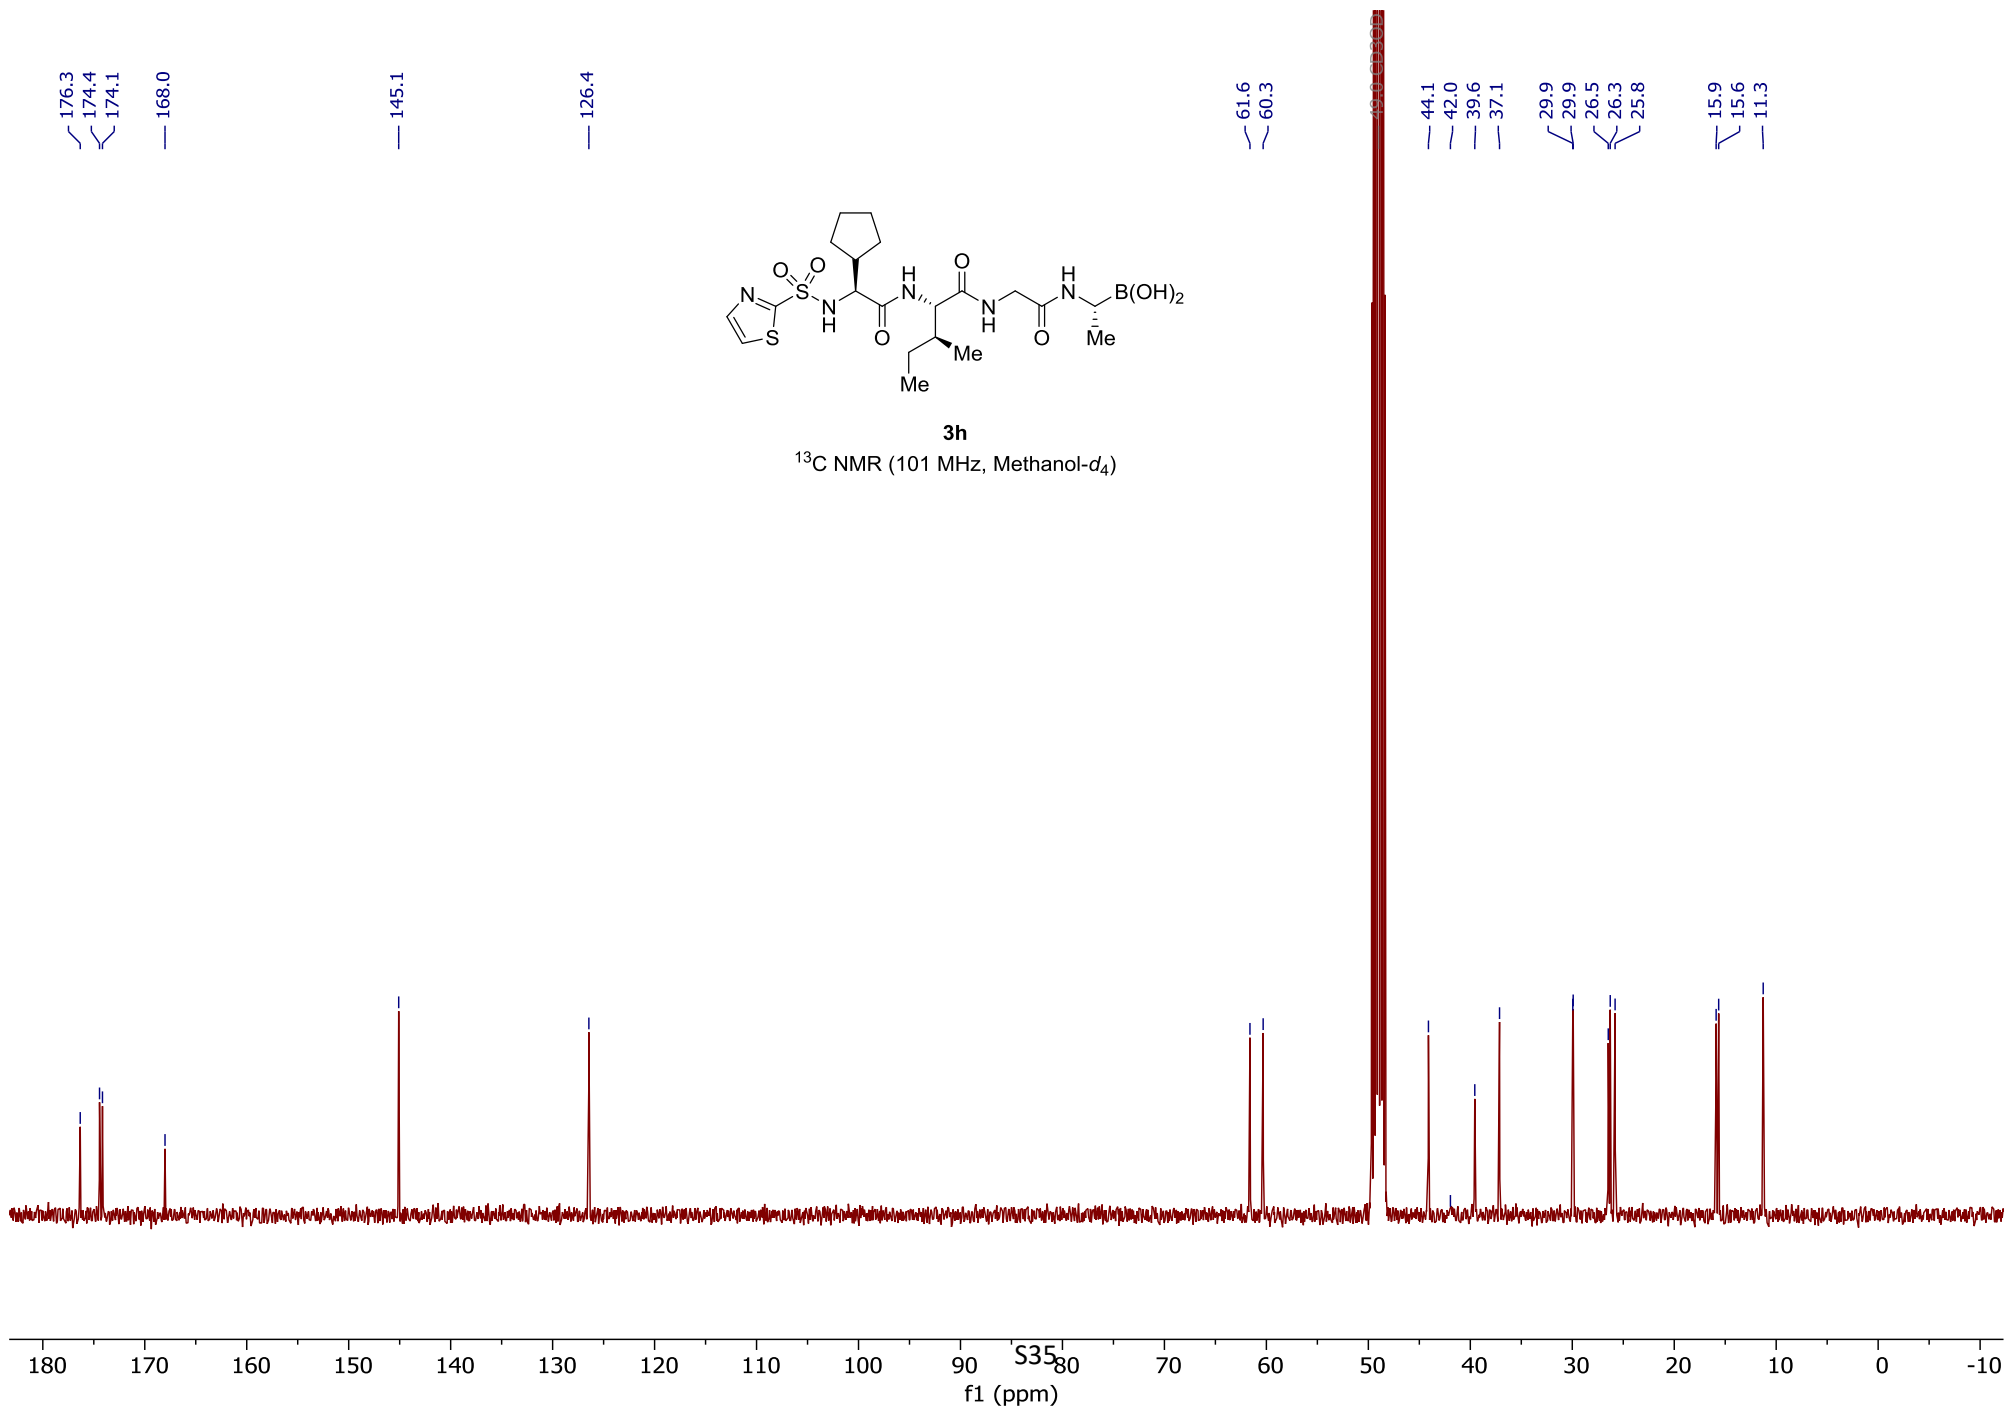

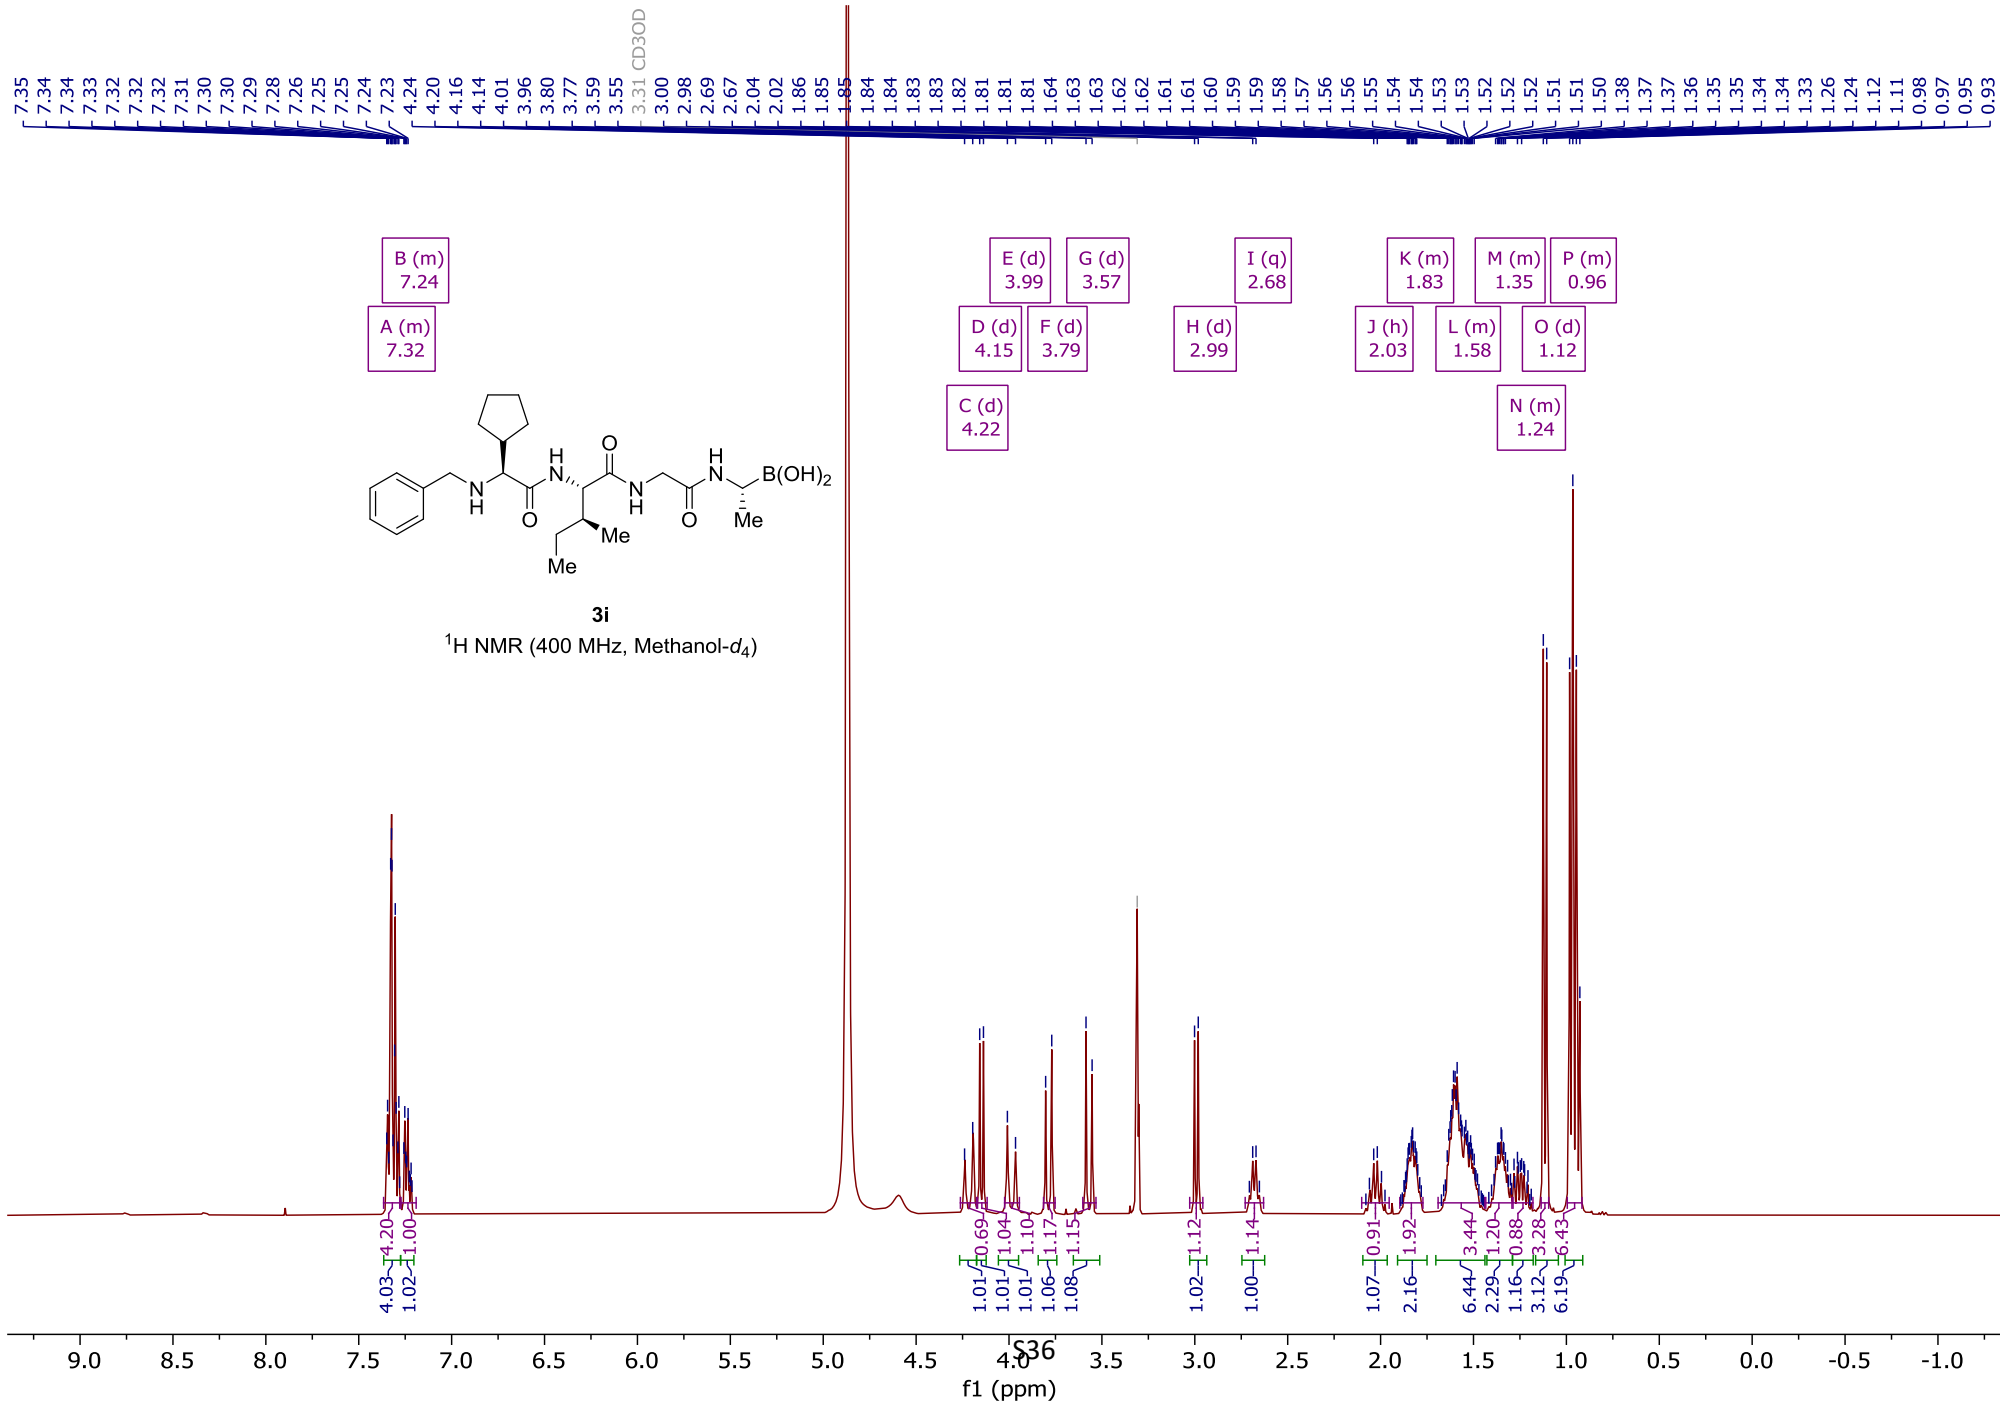

177.6  
176.0  
174.5

140.9

129.5  
129.4  
128.2

66.9

59.4

53.0

49.0

45.0

41.7

39.8

37.4

30.6

30.1

26.3

26.2

26.0

16.0

15.8

11.1

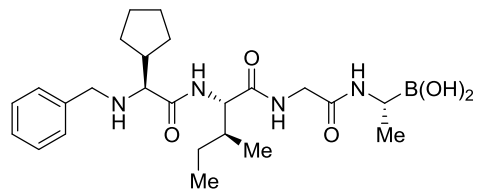

3i

<sup>13</sup>C NMR (101 MHz, Methanol-d<sub>4</sub>)

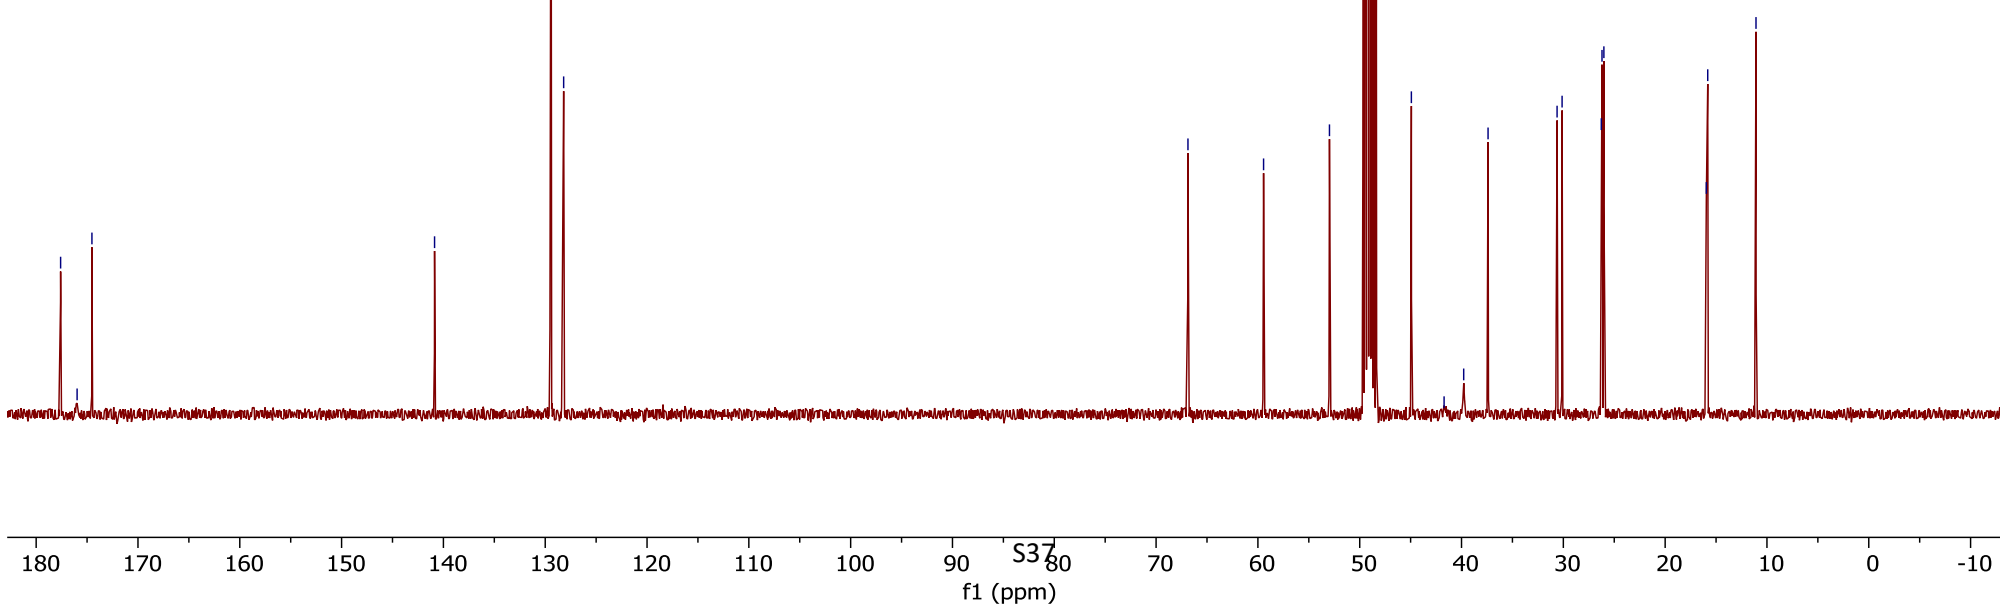

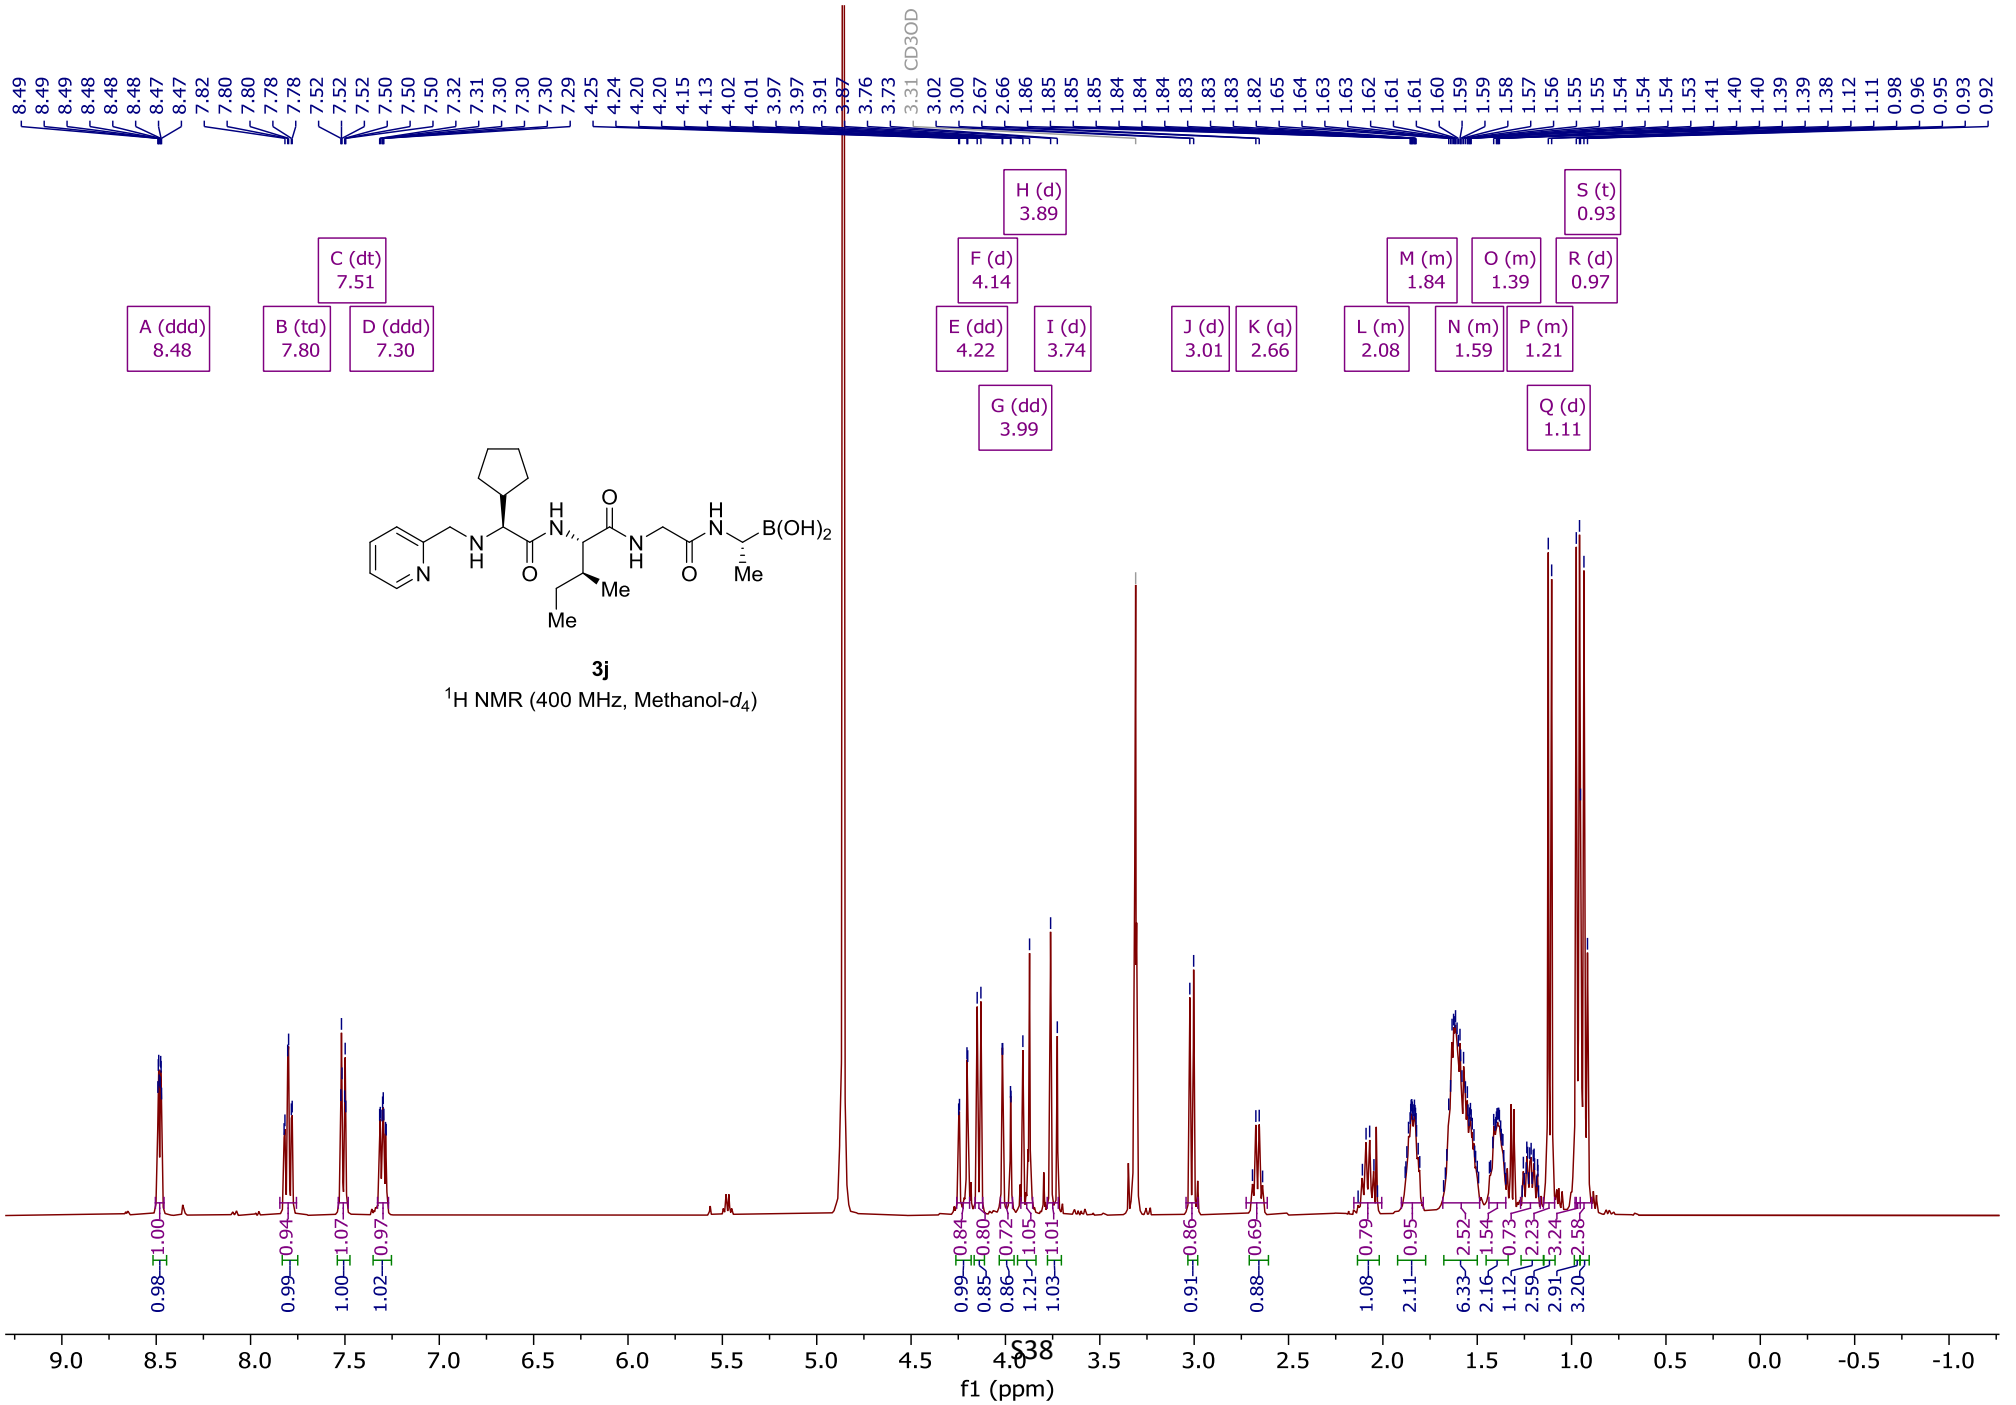

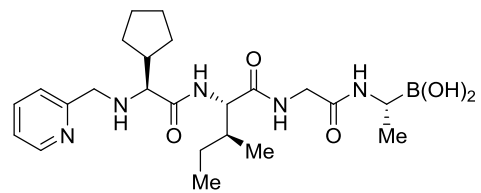

**3j**

<sup>13</sup>C NMR (101 MHz, Methanol-*d*<sub>4</sub>)

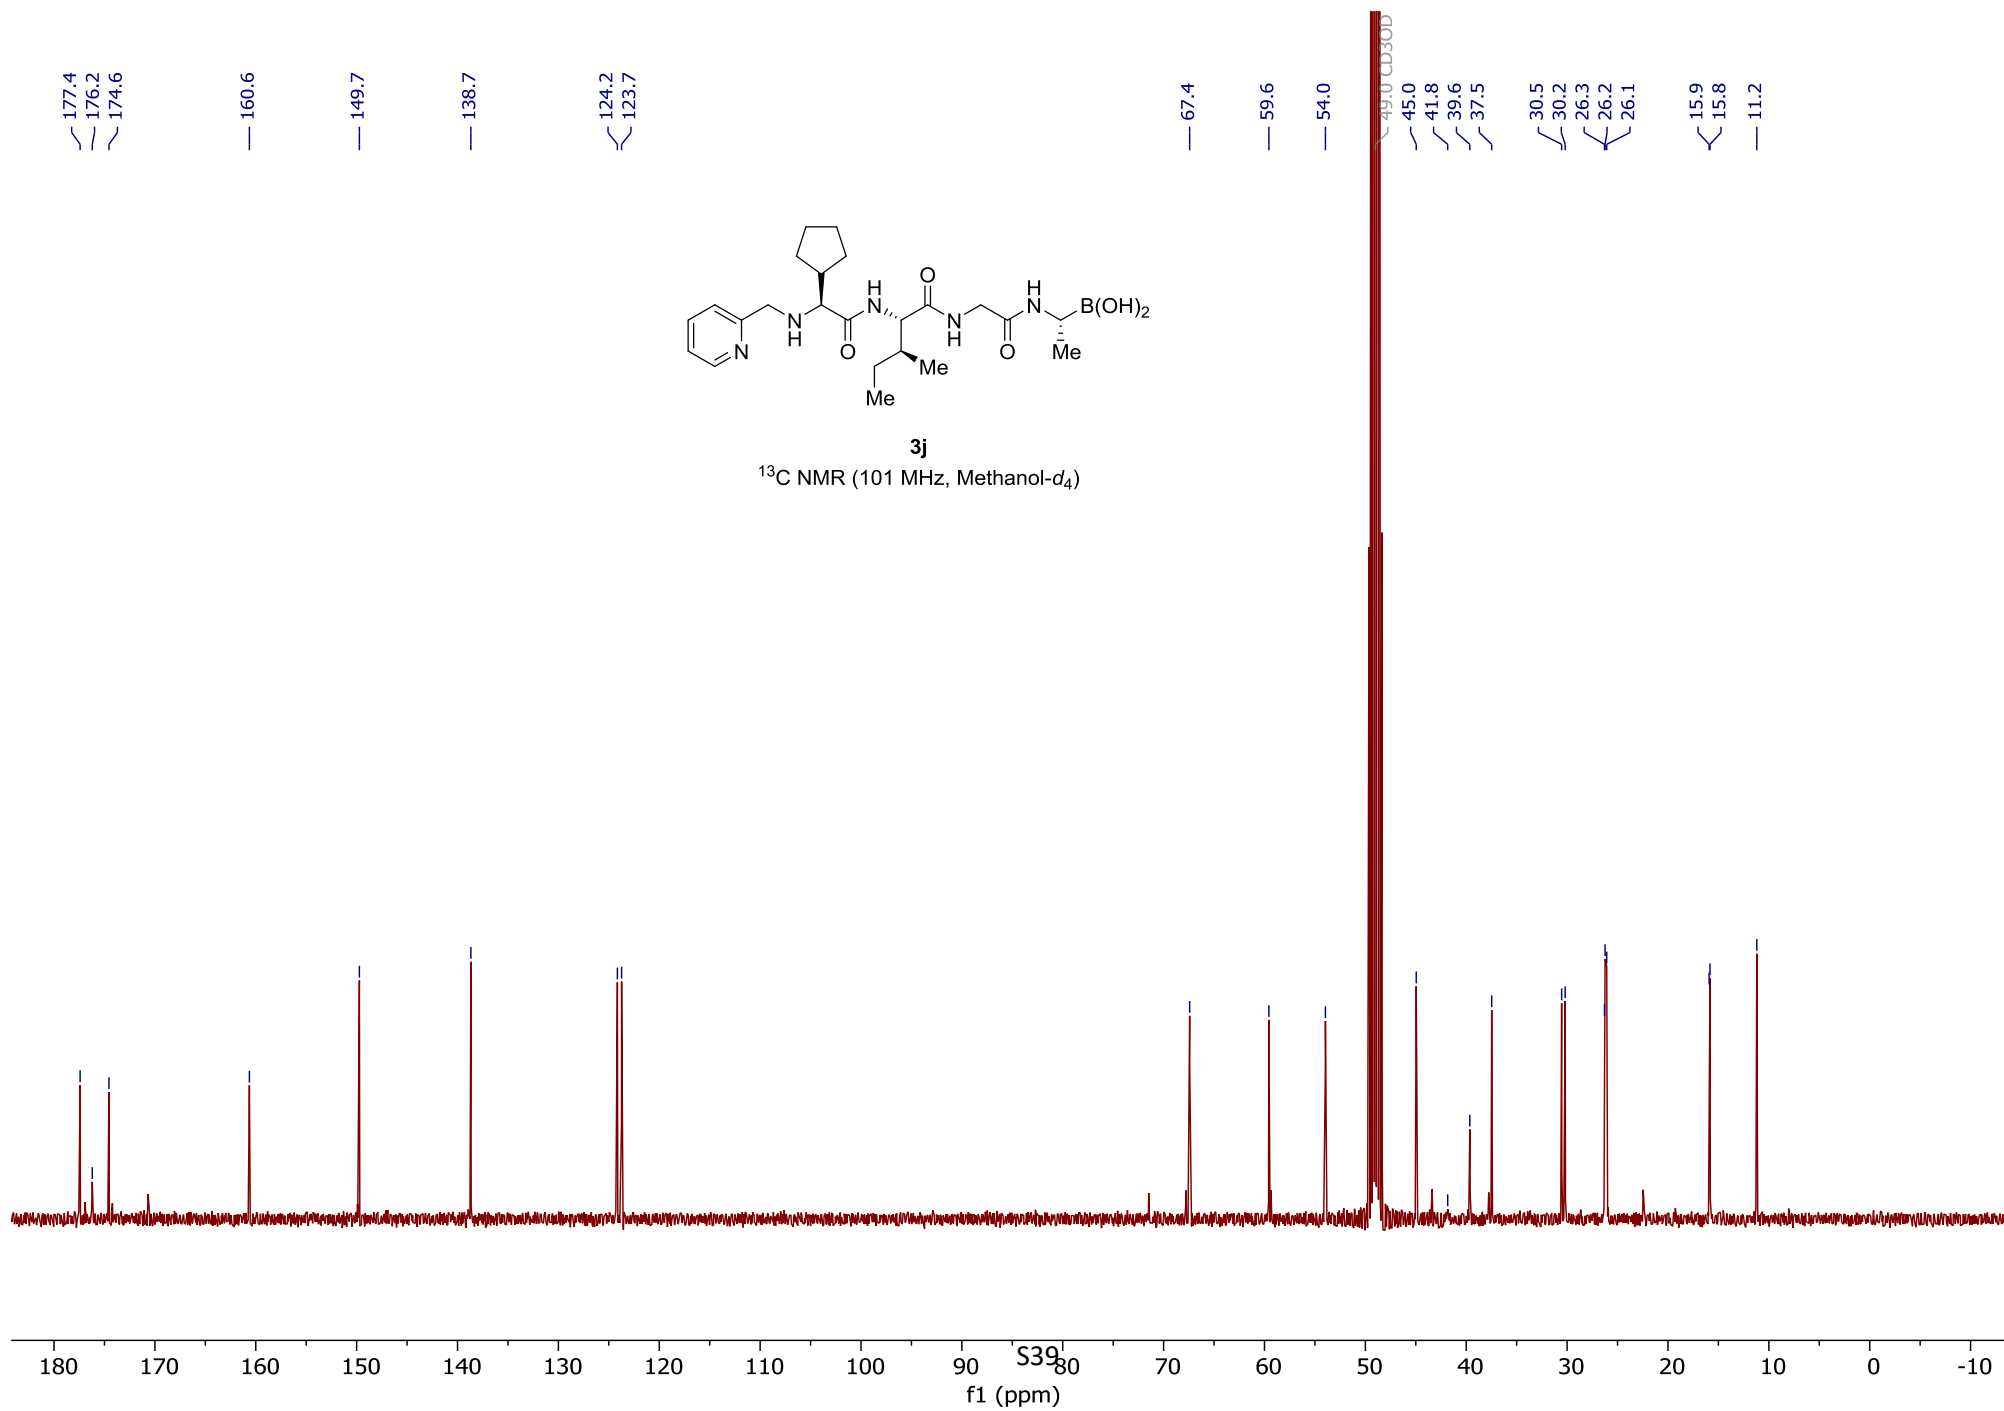

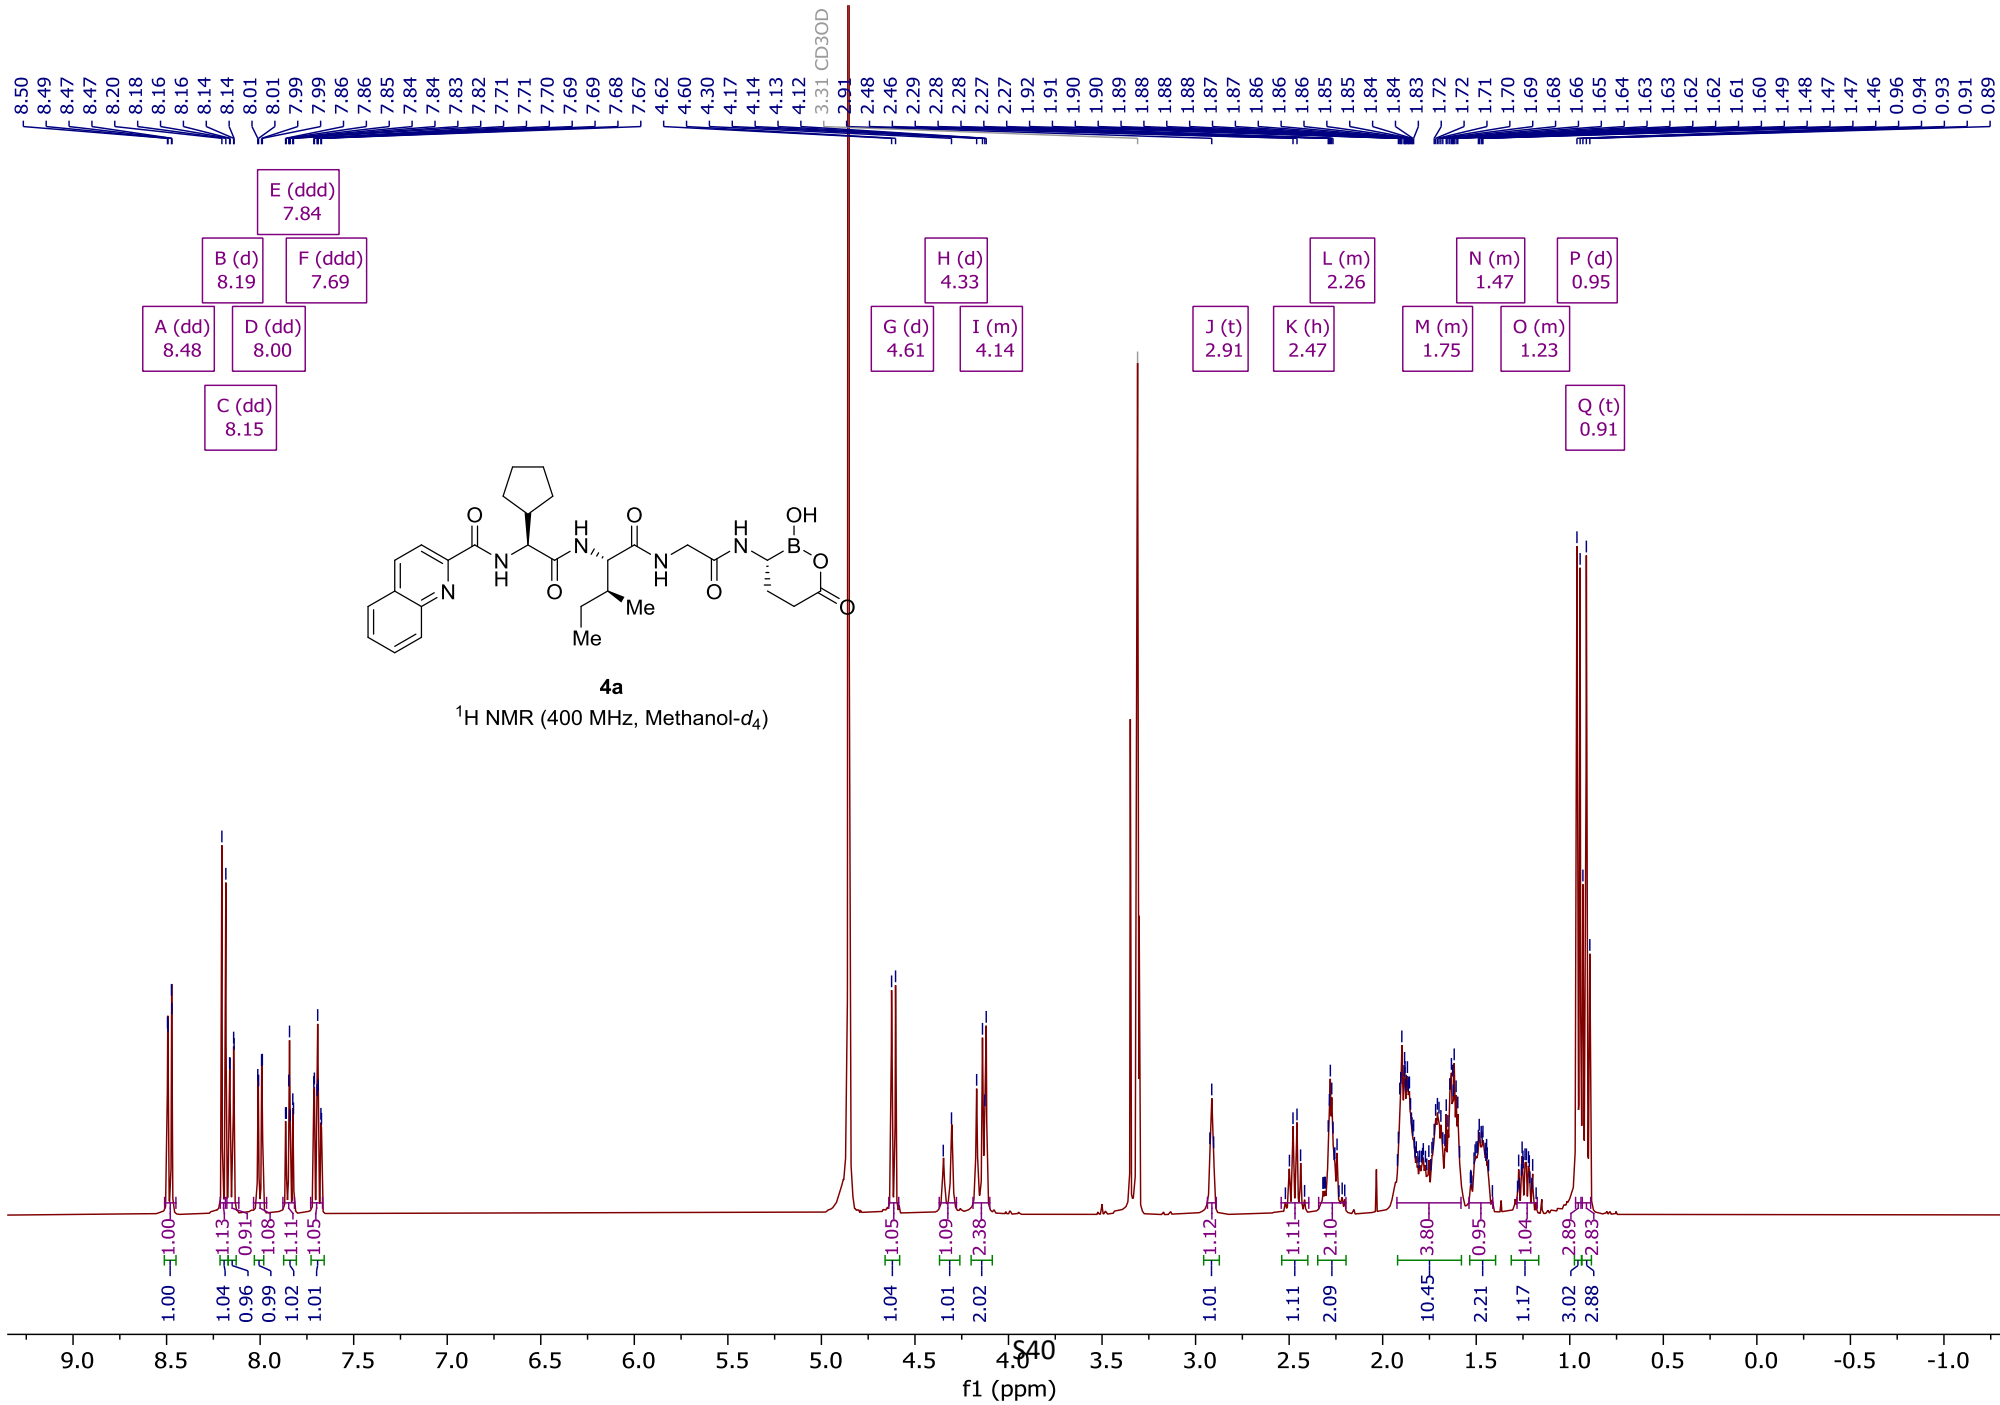



179.8  
176.7  
174.7  
174.5

166.4

150.4  
147.9

139.2

131.7  
130.9  
130.7  
129.5  
129.1

119.5

60.1  
58.2

44.1  
42.7  
39.3  
37.3

30.3  
30.1  
29.2  
26.3  
26.0  
25.6

15.7

11.2

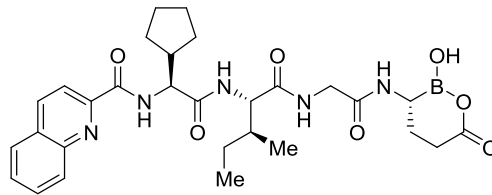

4a

<sup>13</sup>C NMR (101 MHz, Methanol-d<sub>4</sub>)

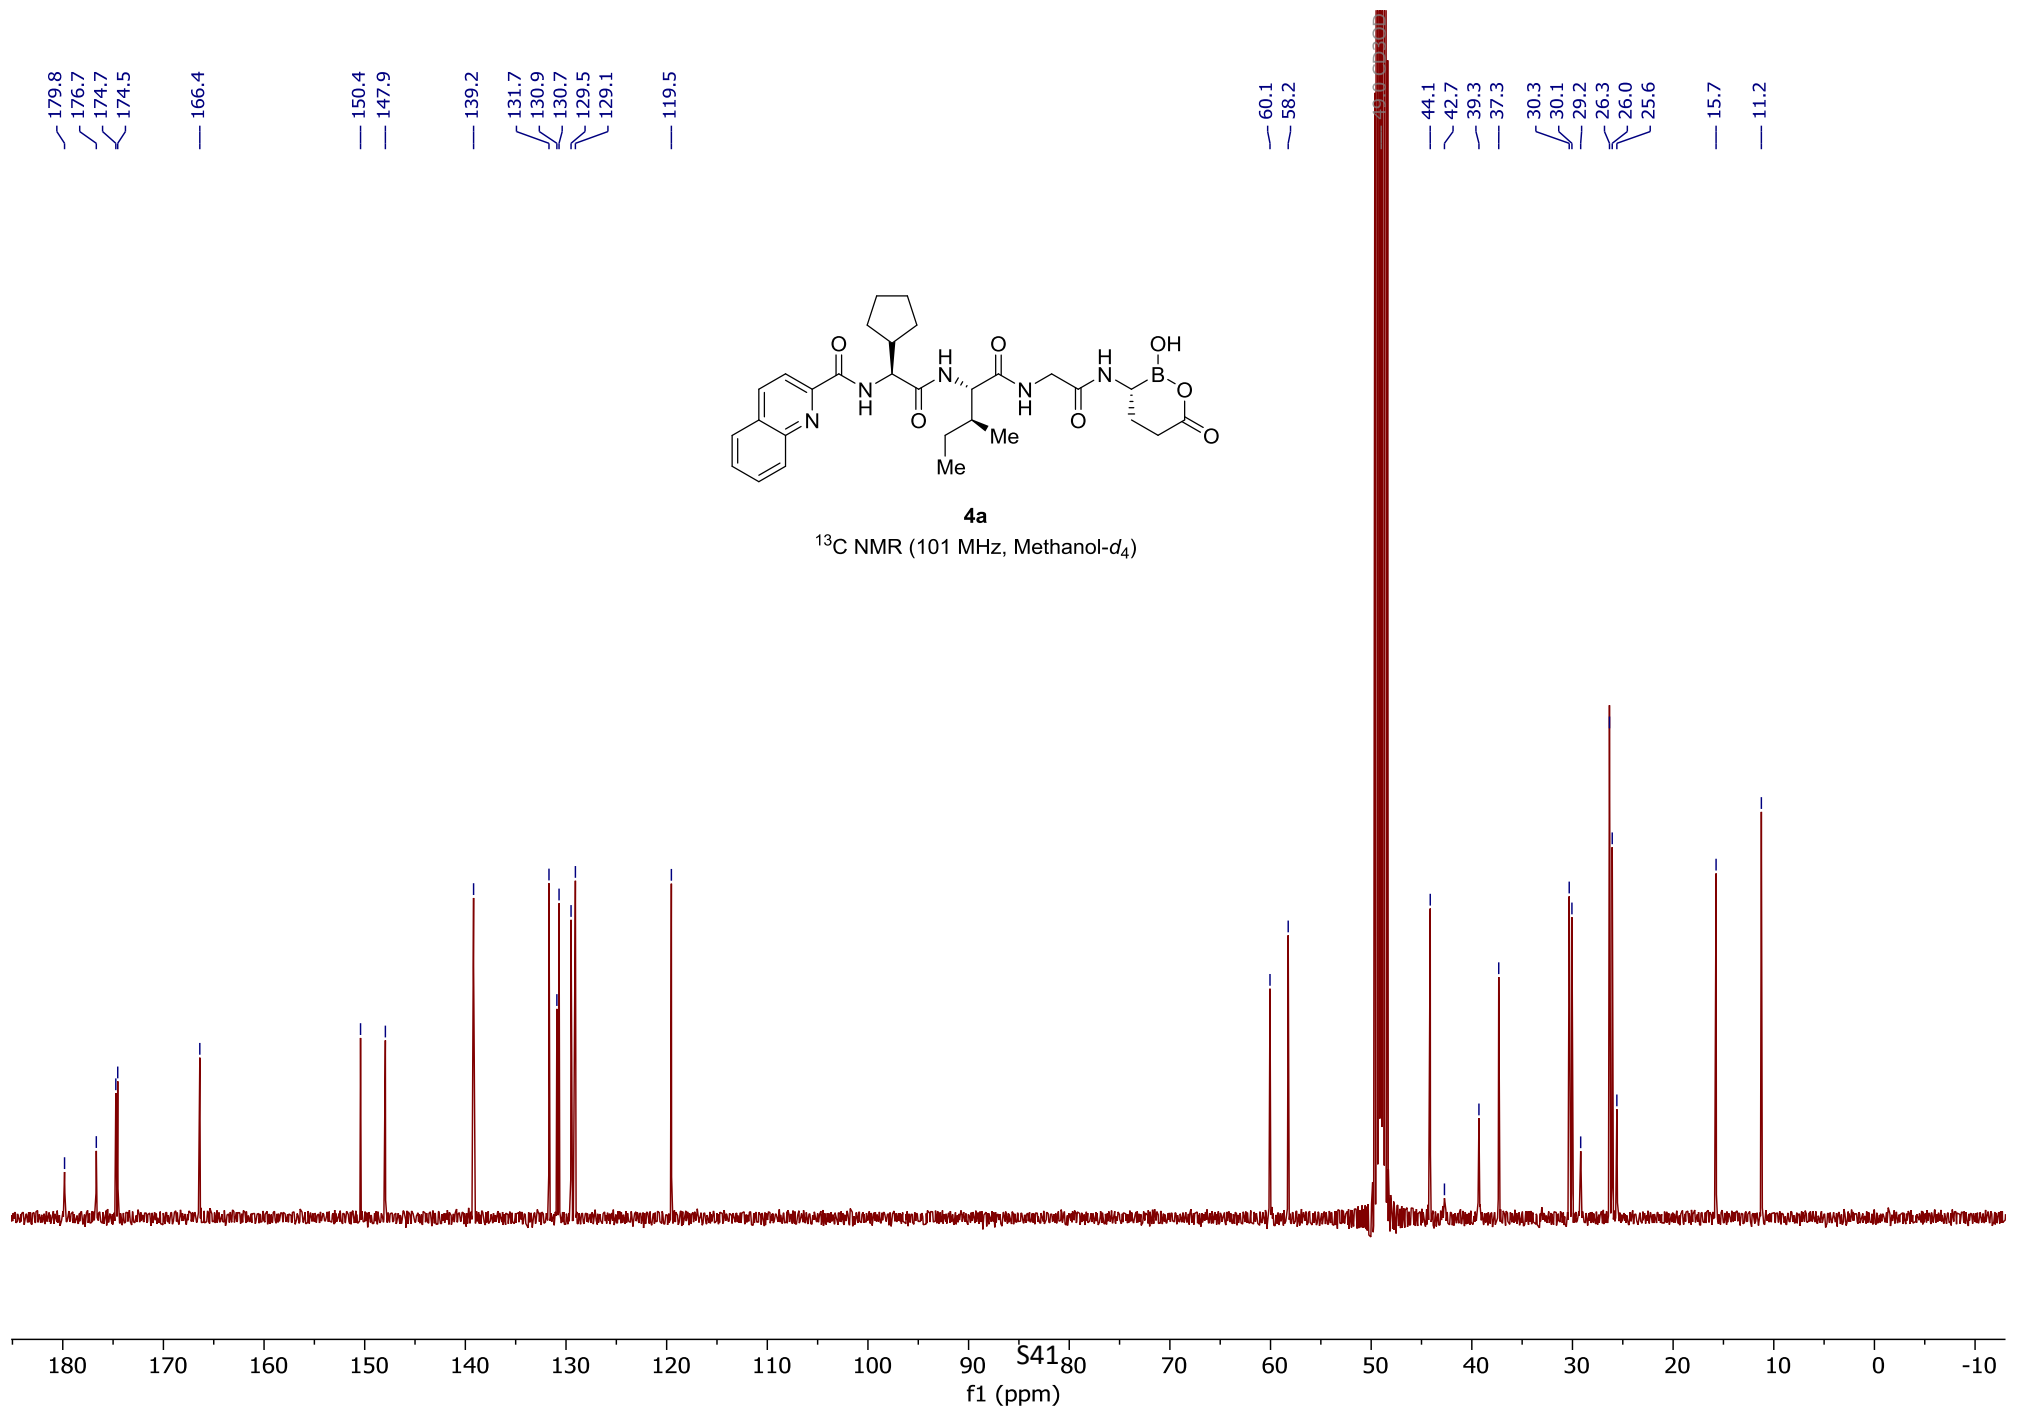

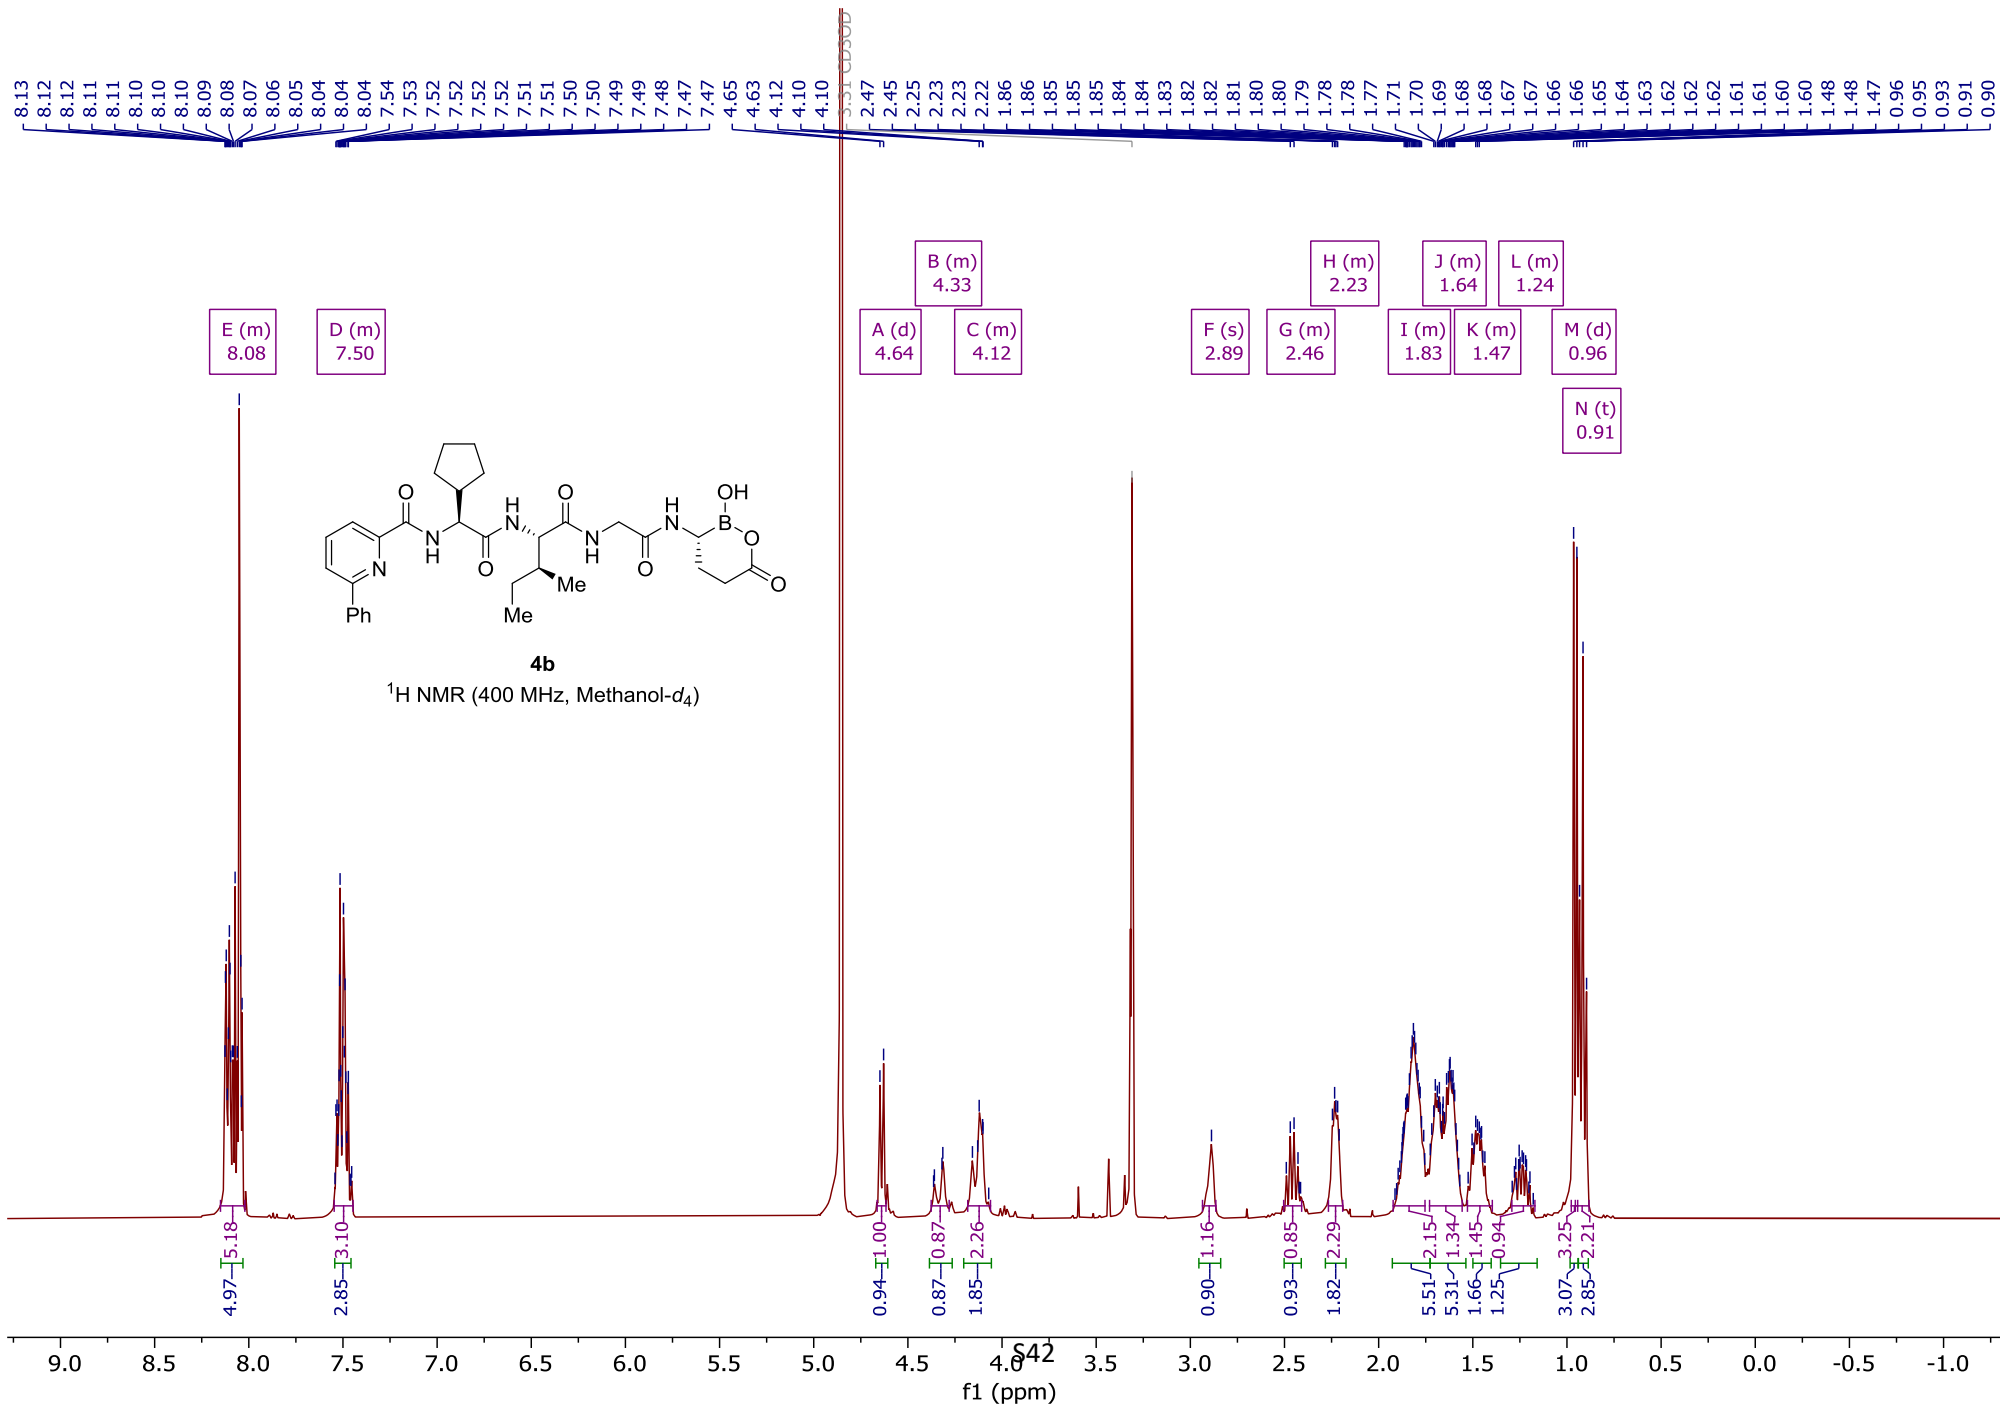

179.8  
176.6  
174.8  
174.5

166.3

157.7

150.2

140.0  
139.5

130.7  
130.0  
128.0  
124.7  
121.6

60.1  
57.7

44.3  
42.7  
39.3  
37.3  
30.3  
29.7  
29.1  
26.4  
26.4  
26.1  
25.5

15.7  
11.2

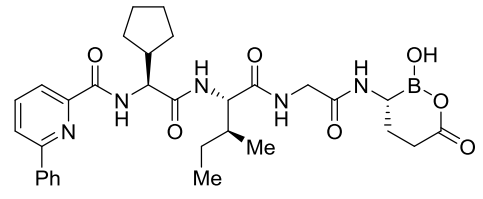

**4b**

<sup>13</sup>C NMR (101 MHz, Methanol-d<sub>4</sub>)

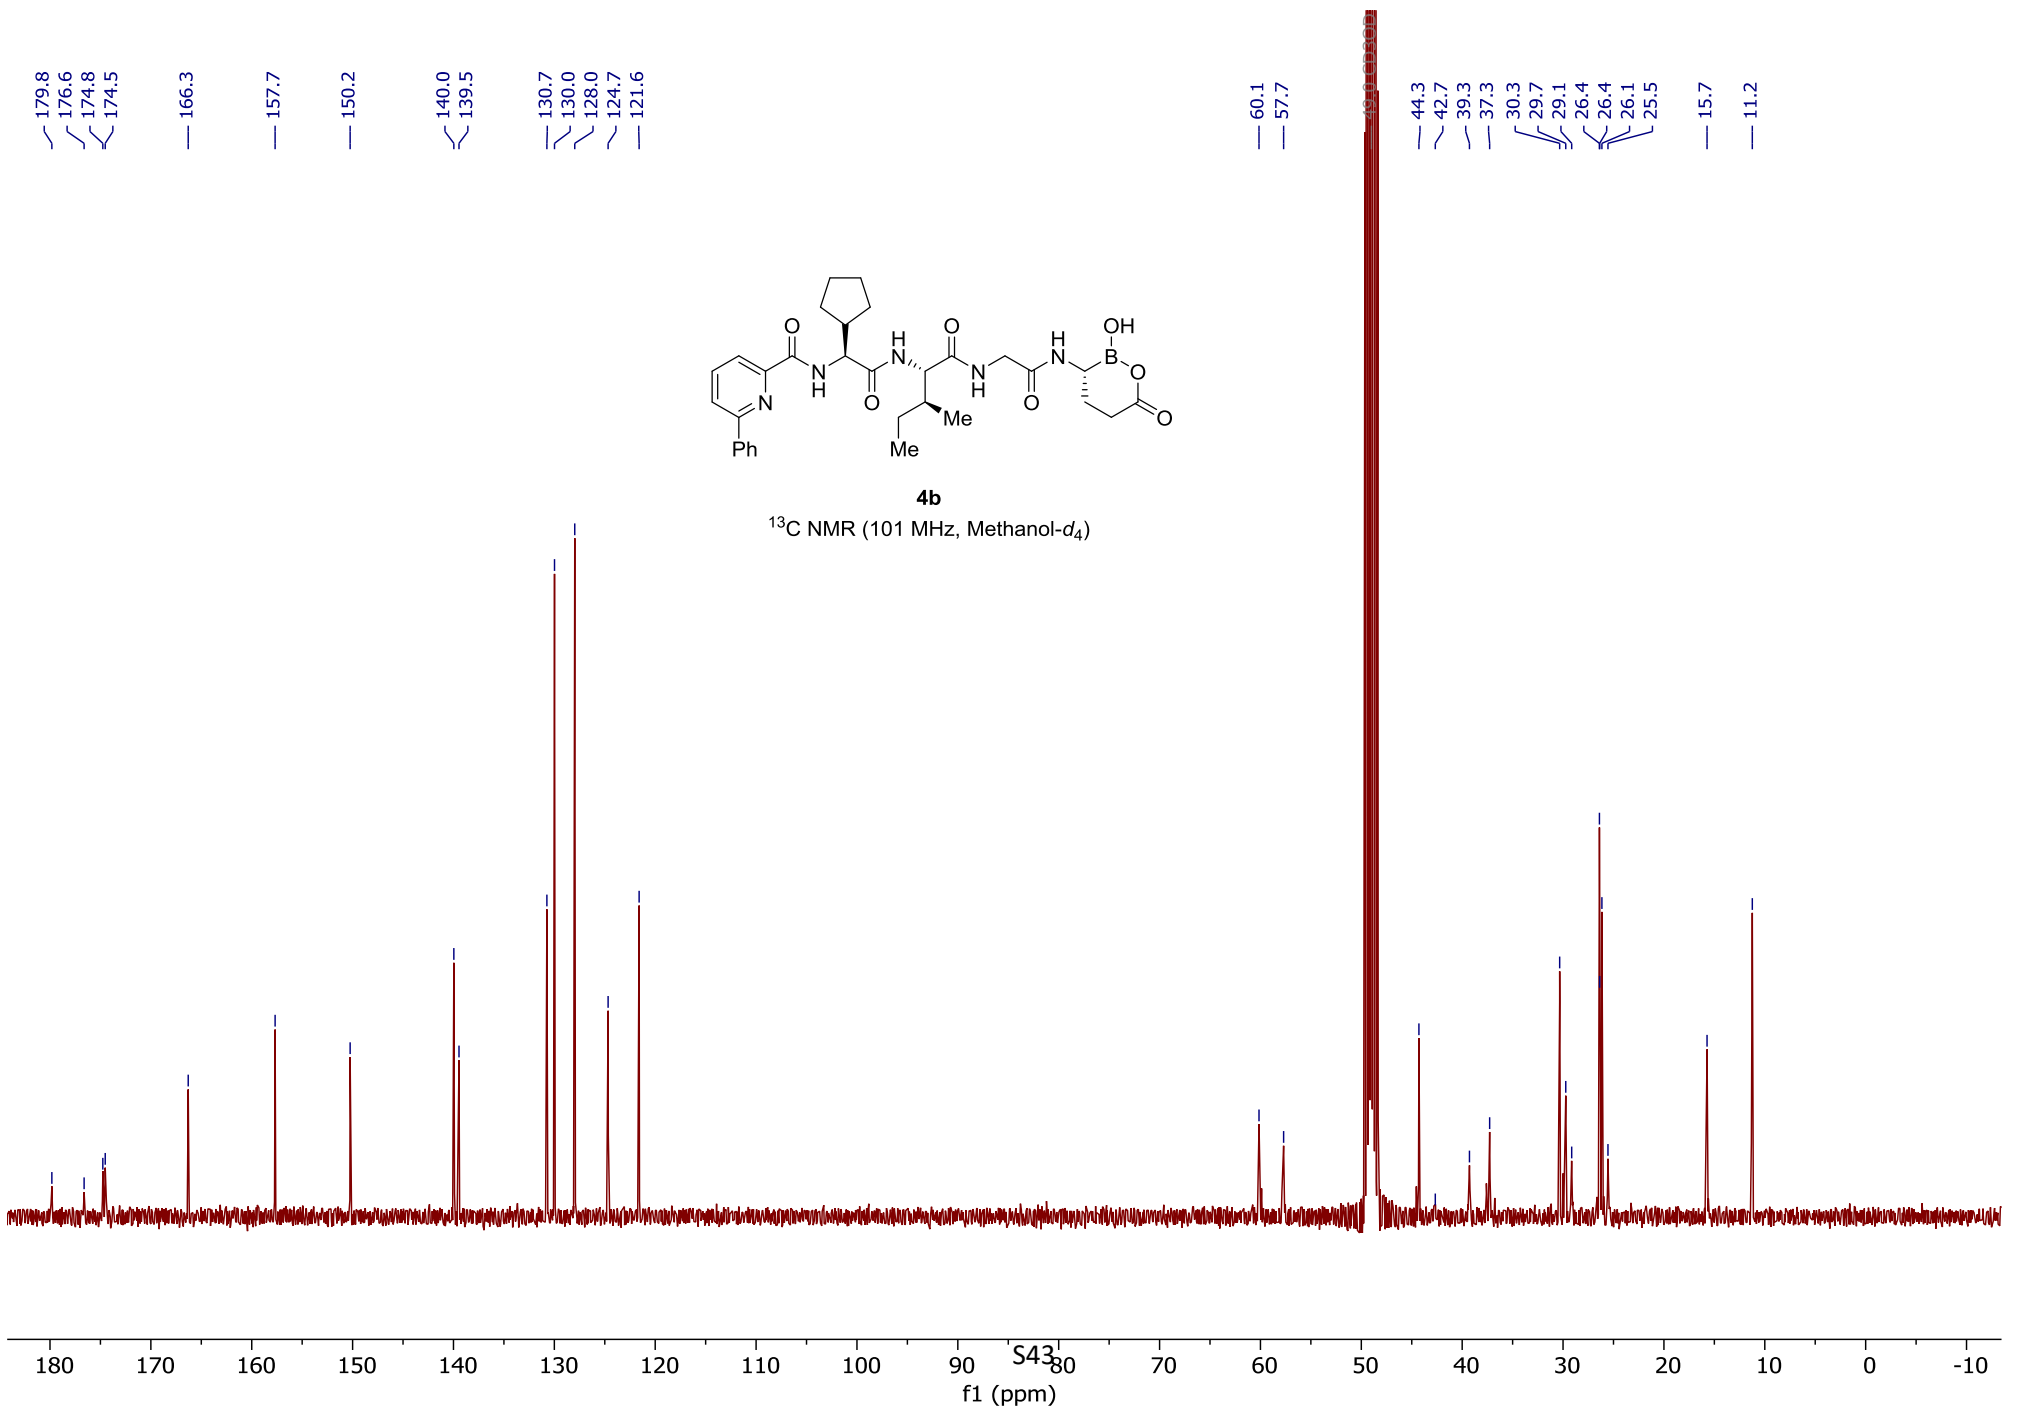

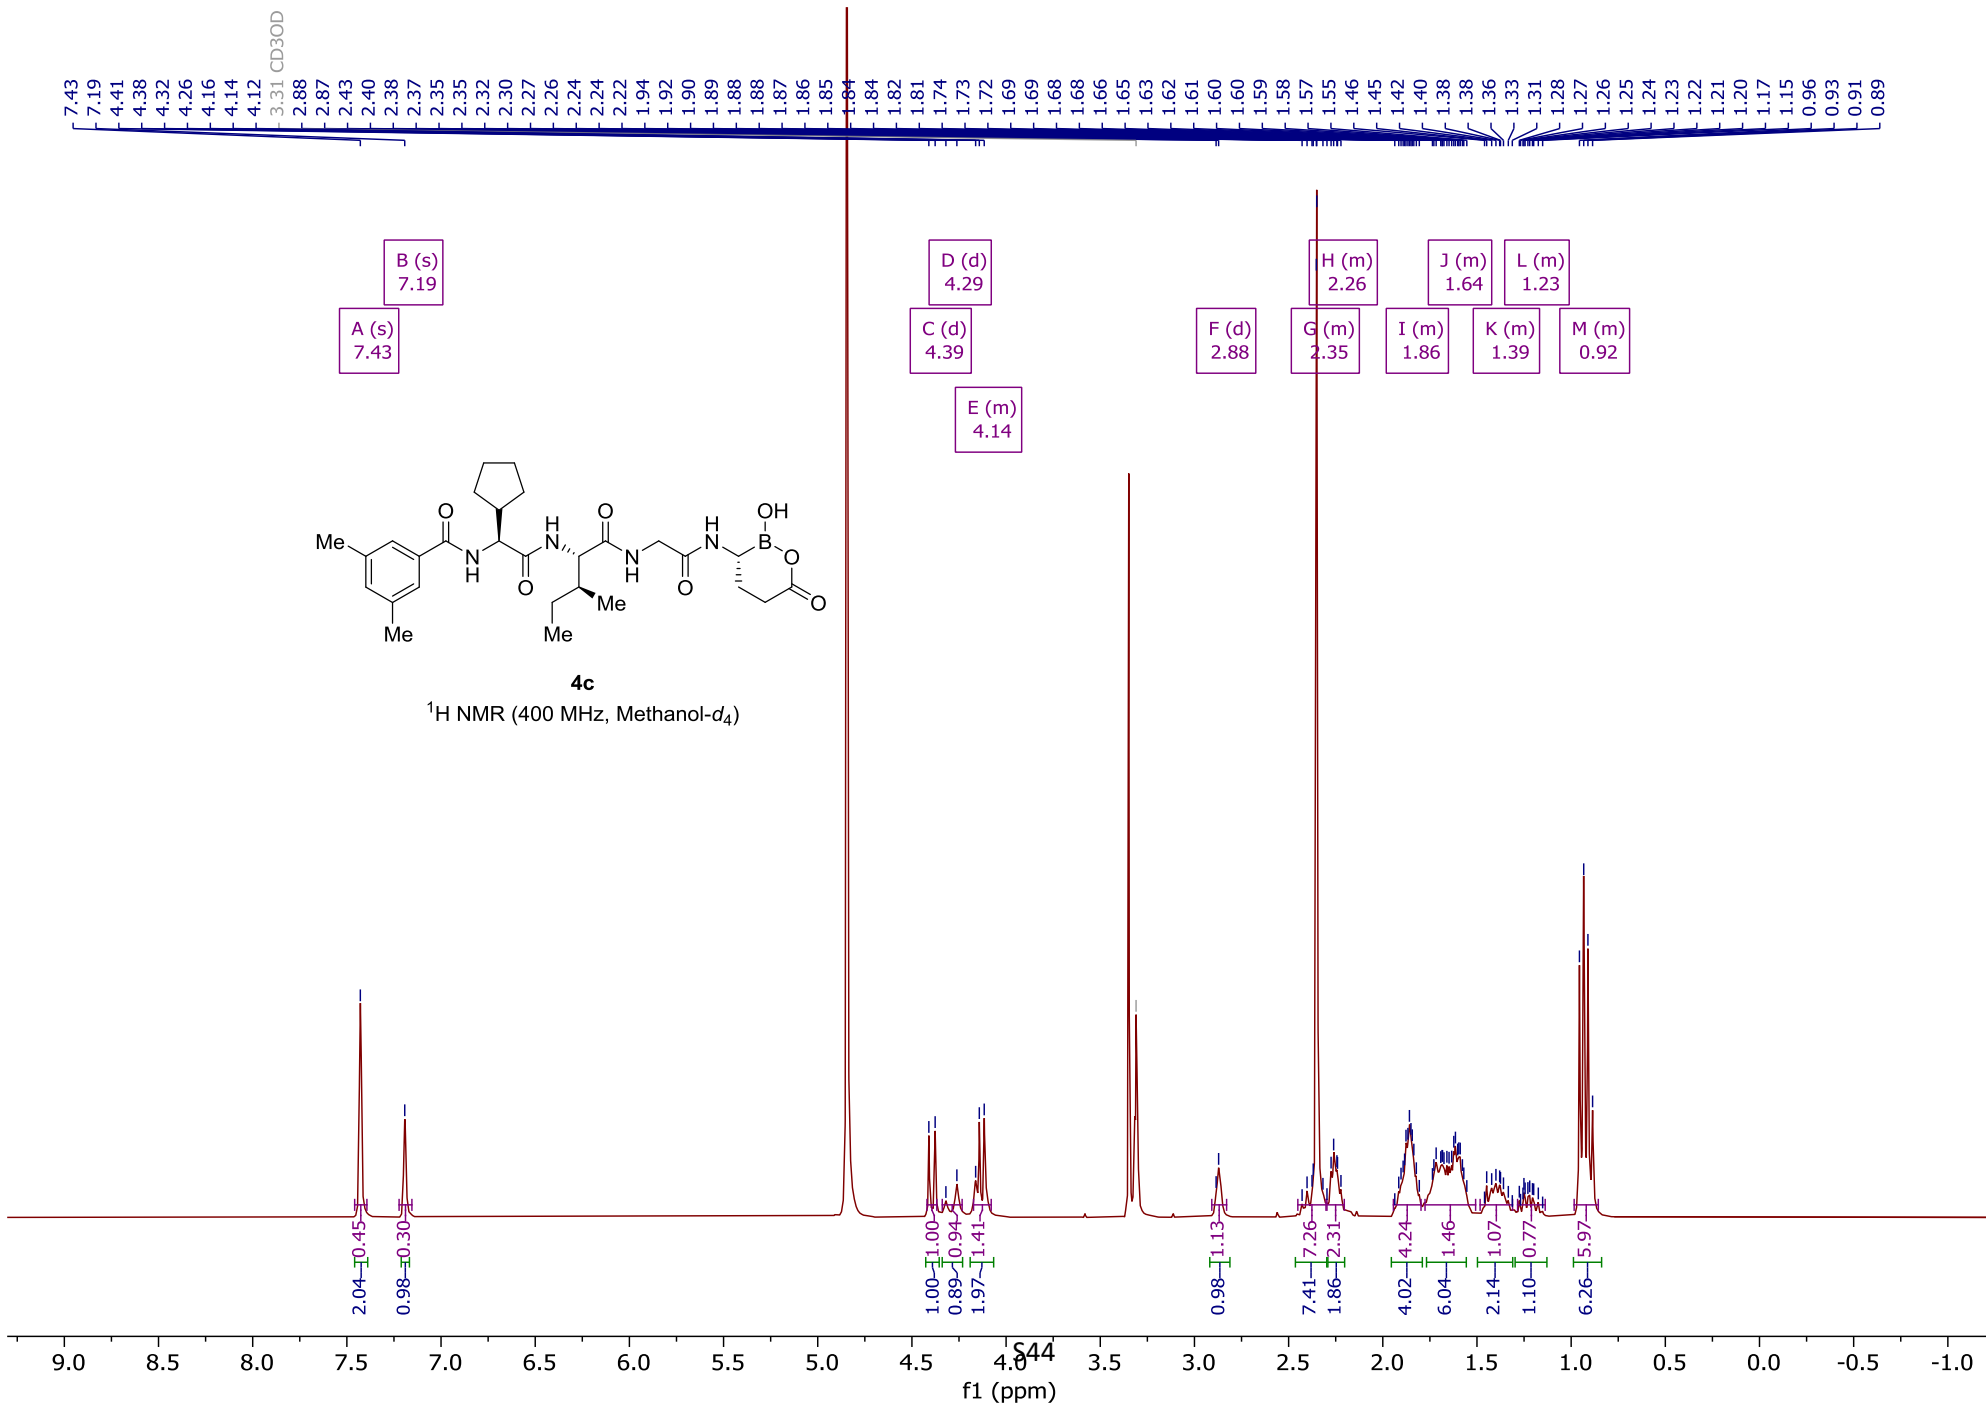

179.8  
176.7  
175.1  
174.6  
170.9

139.5  
135.3  
134.3

126.2

59.9  
59.7

42.8  
39.3  
37.5

30.8  
30.5  
29.2  
26.4  
26.2  
26.0  
25.6  
21.3  
15.8  
11.3

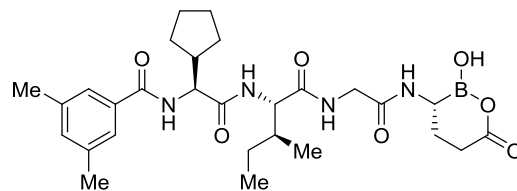

**4c**

<sup>13</sup>C NMR (101 MHz, Methanol-d<sub>4</sub>)

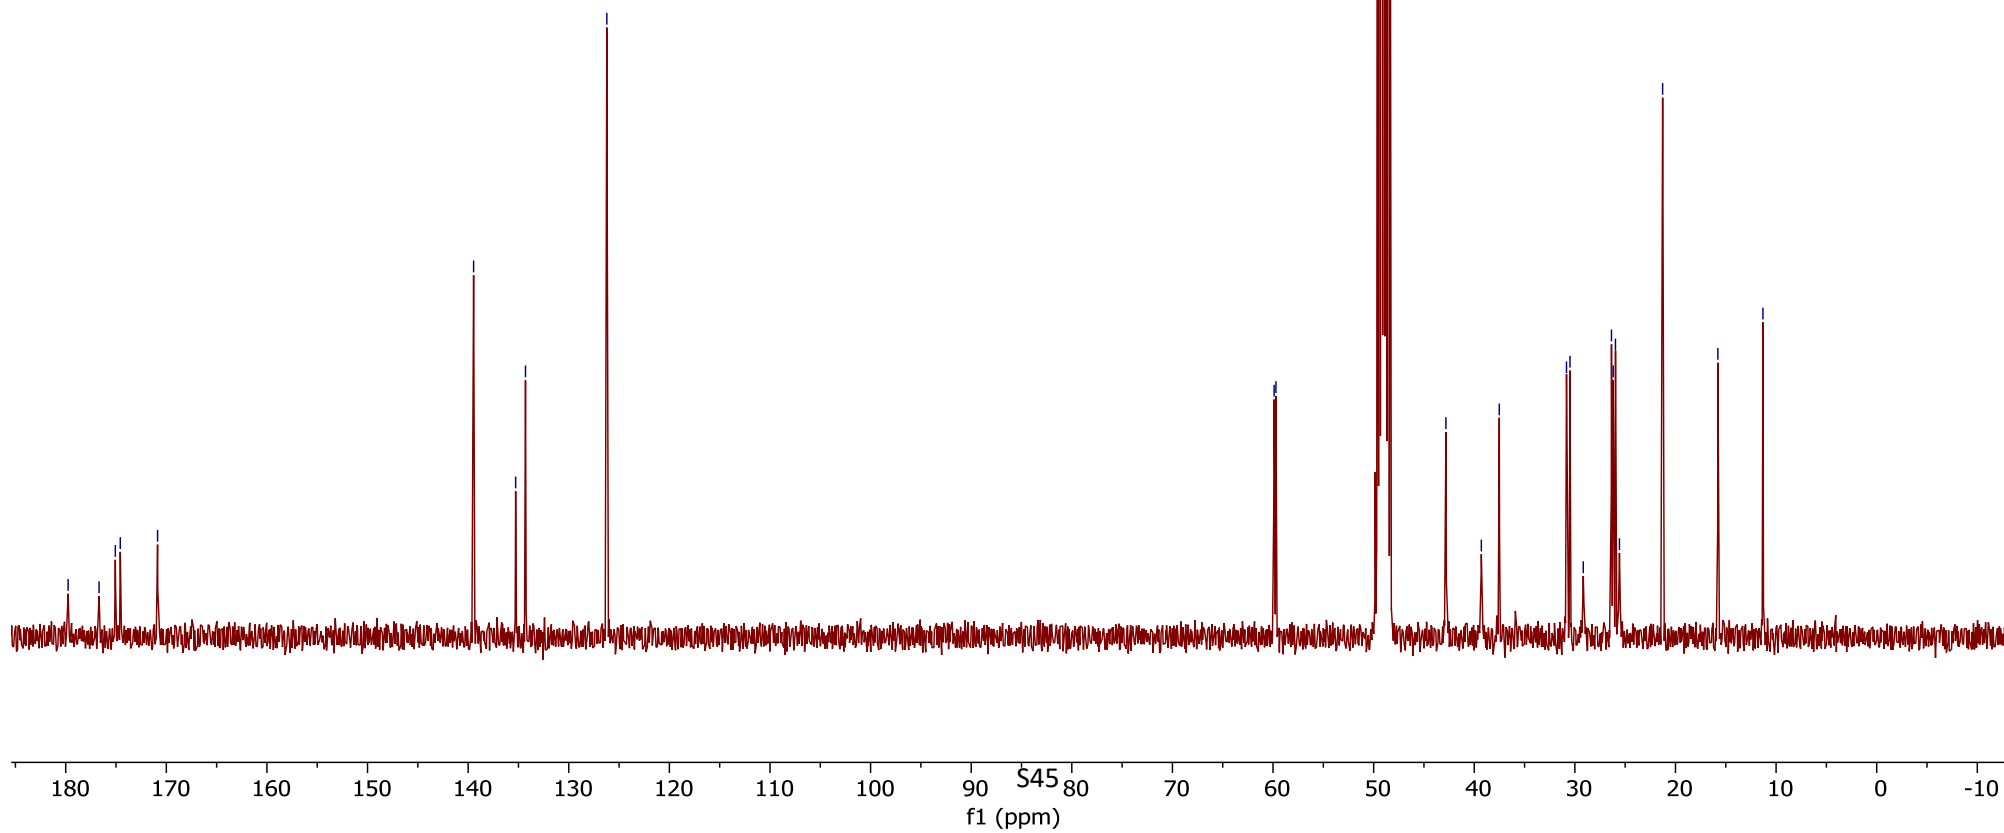

## 5. Representative examples of HPLC purity

| SAMPLE INFORMATION |                          |                     |                  |
|--------------------|--------------------------|---------------------|------------------|
| Sample Name:       | osm-EP_1506              | Acquired By:        | Olita            |
| Sample Type:       | Unknown                  | Sample Set Name:    | 26042024p        |
| Vial:              | 5                        | Acq. Method Set:    | MeCN_0_5min_100% |
| Injection #:       | 1                        | Processing Method:  | Processing       |
| Injection Volume:  | 30.00 ul                 | Channel Name:       | W2489 ChA        |
| Run Time:          | 20.0 Minutes             | Proc. Chnl. Descr.: | W2489 ChA 210nm  |
| Date Acquired:     | 2024.04.26. 15:31:28 EET |                     |                  |
| Date Processed:    | 2024.04.26. 16:24:34 EET |                     |                  |

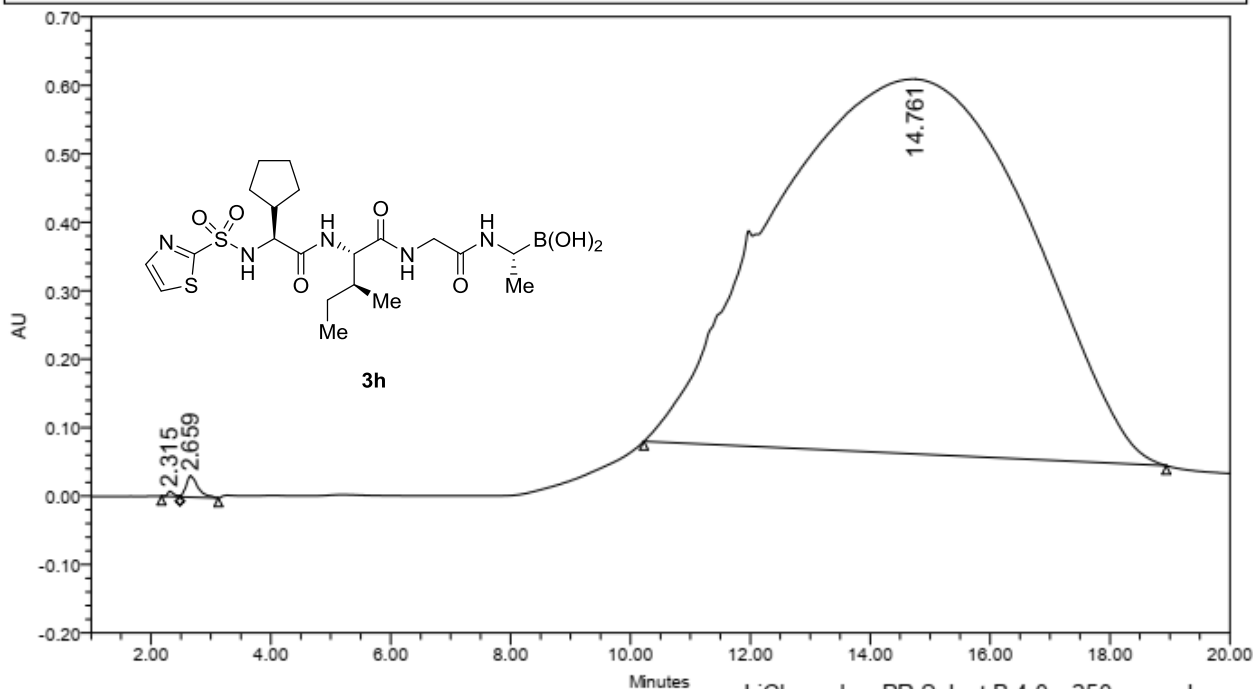

|   | RT     | Area      | % Area | Height |
|---|--------|-----------|--------|--------|
| 1 | 2.315  | 56447     | 0.03   | 7455   |
| 2 | 2.659  | 431249    | 0.27   | 31180  |
| 3 | 14.761 | 161940290 | 99.70  | 547420 |

Reported by User: Olita  
 Report Method: Default Individual Report  
 Report Method ID 12125  
 Page: 1 of 1

Project Name: Martins  
 Date Printed:  
 2024.04.26.  
 16:25:36 Europe/Riga

## SAMPLE INFORMATION

|                                          |                                     |
|------------------------------------------|-------------------------------------|
| Sample Name: osm-EP_1506                 | Acquired By: Olita                  |
| Sample Type: Unknown                     | Sample Set Name: 26042024p          |
| Vial: 5                                  | Acq. Method Set: MeCN_0_5min_100%   |
| Injection #: 1                           | Processing Method: Processing       |
| Injection Volume: 30.00 ul               | Channel Name: W2489 ChB             |
| Run Time: 20.0 Minutes                   | Proc. Chnl. Descr.: W2489 ChB 254nm |
| Date Acquired: 2024.04.26. 15:31:28 EET  |                                     |
| Date Processed: 2024.04.26. 16:24:05 EET |                                     |

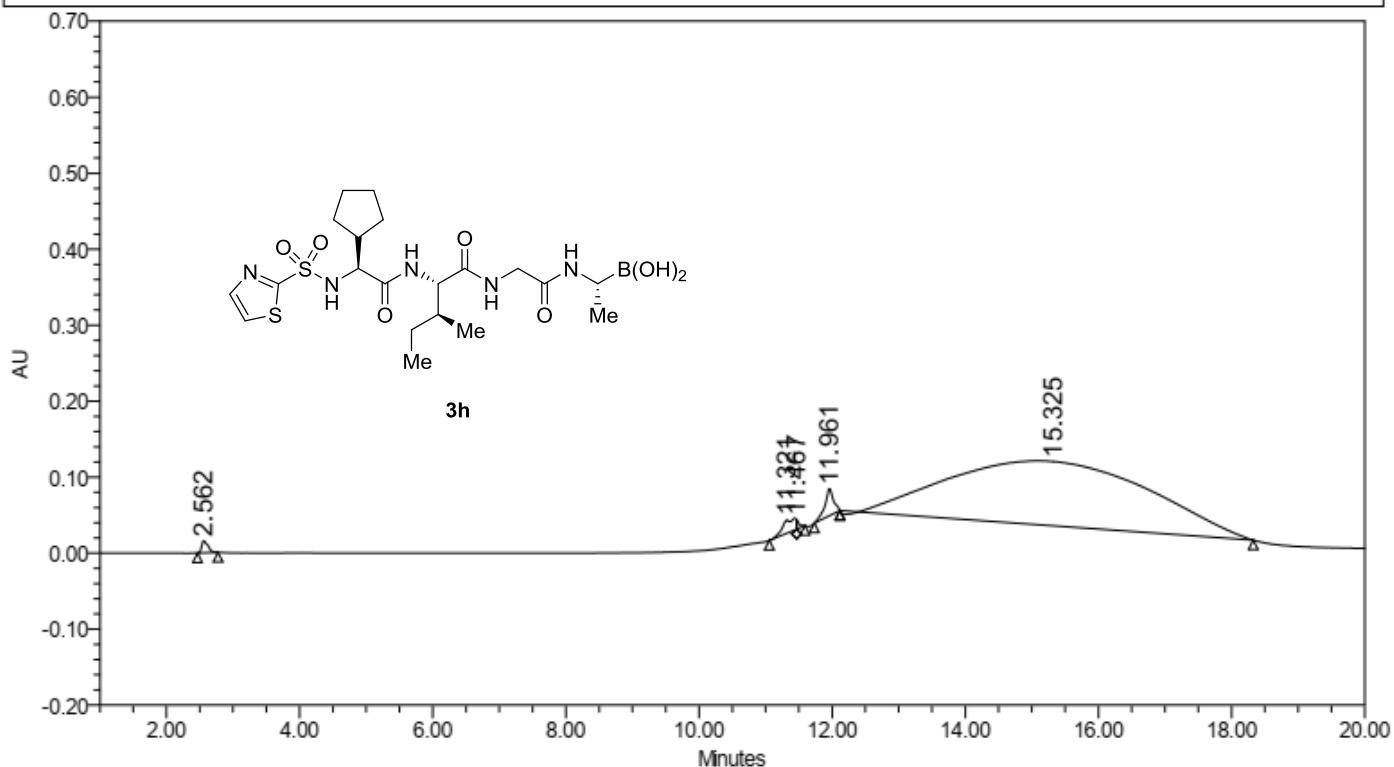

|   | RT     | Area     | % Area | Height |
|---|--------|----------|--------|--------|
| 1 | 2.562  | 103532   | 0.56   | 15944  |
| 2 | 11.321 | 220761   | 1.19   | 16922  |
| 3 | 11.467 | 31279    | 0.17   | 12164  |
| 4 | 11.961 | 314452   | 1.69   | 35193  |
| 5 | 15.325 | 17937149 | 96.40  | 84529  |

LiChrospher PR Select B 4.0 x 250 mm column  
 A 5% MeCN in 0.1% H<sub>3</sub>PO<sub>4</sub>  
 B 95% MeCN in 0.1% H<sub>3</sub>PO<sub>4</sub>  
 Gradient 15 min 0% A to 100% B; 5 min 100% B  
 Column Temperature 40°C  
 Flow Rate: 1.0 ml/min

Reported by User: Olita  
 Report Method: Default Individual Report  
 Report Method ID 12125  
 Page: 1 of 1

Project Name: Martins  
 Date Printed:  
 2024.04.26.  
 16:25:05 Europe/Riga

## SAMPLE INFORMATION

|                                                                                                                                                                                                                                  |                                                                                                                                                                                         |
|----------------------------------------------------------------------------------------------------------------------------------------------------------------------------------------------------------------------------------|-----------------------------------------------------------------------------------------------------------------------------------------------------------------------------------------|
| Sample Name: osm-EP_1800<br>Sample Type: Unknown<br>Vial: 7<br>Injection #: 1<br>Injection Volume: 30.00 ul<br>Run Time: 20.0 Minutes<br><br>Date Acquired: 2024.04.26. 12:53:45 EET<br>Date Processed: 2024.04.26. 13:35:35 EET | Acquired By: Olita<br>Sample Set Name: 26042024<br>Acq. Method Set: MeCN_0_5min_100%<br>Processing Method: Processing<br>Channel Name: W2489 ChA<br>Proc. Chnl. Descr.: W2489 ChA 210nm |
|----------------------------------------------------------------------------------------------------------------------------------------------------------------------------------------------------------------------------------|-----------------------------------------------------------------------------------------------------------------------------------------------------------------------------------------|

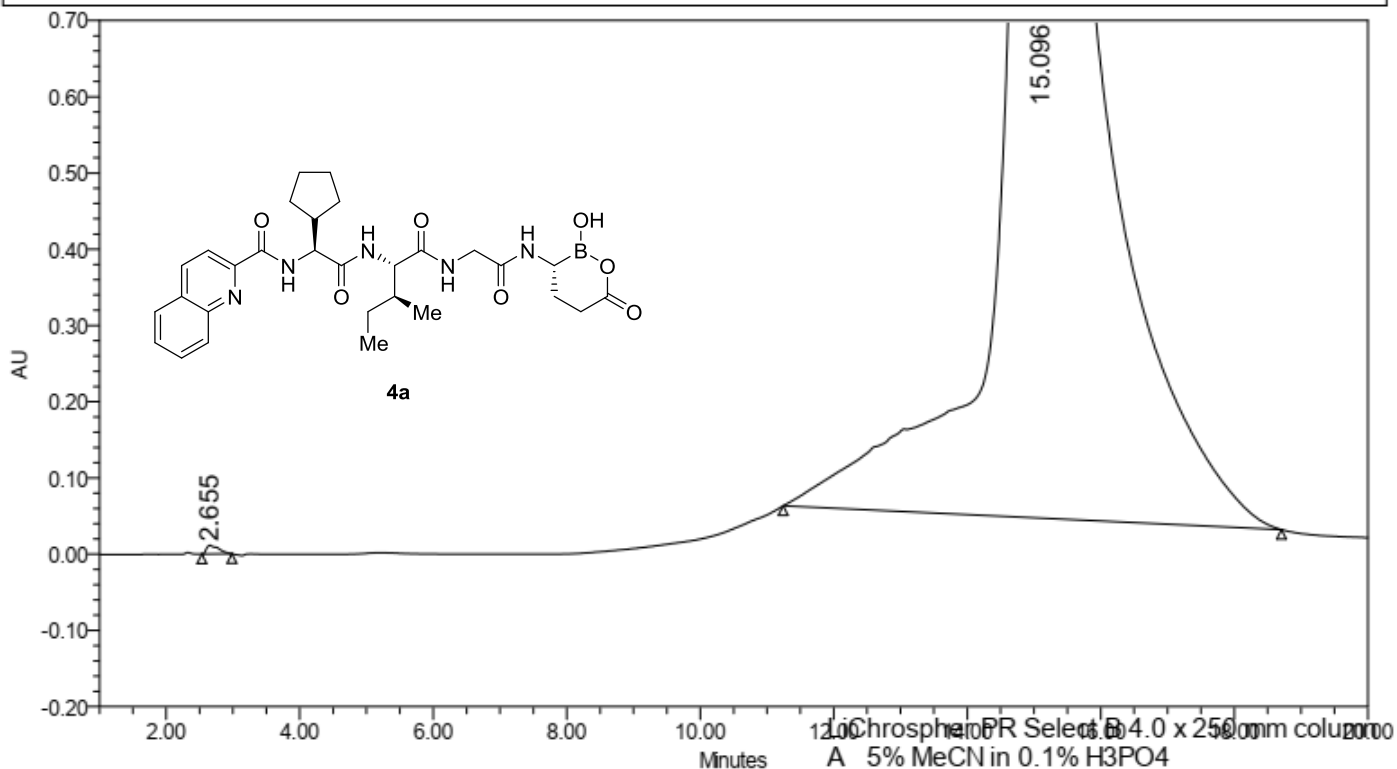

|   | RT     | Area      | % Area | Height  |
|---|--------|-----------|--------|---------|
| 1 | 2.655  | 145944    | 0.10   | 11451   |
| 2 | 15.096 | 146271984 | 99.90  | 1576171 |

Reported by User: Olita  
 Report Method: Default Individual Report  
 Report Method ID 12125  
 Page: 1 of 1

Project Name: Martins  
 Date Printed:  
 2024.04.26.  
 13:37:22 Europe/Riga



## SAMPLE INFORMATION

Sample Name: osm-EP\_1800  
 Sample Type: Unknown  
 Vial: 7  
 Injection #: 1  
 Injection Volume: 30.00 ul  
 Run Time: 20.0 Minutes

Acquired By: Olita  
 Sample Set Name: 26042024  
 Acq. Method Set: MeCN\_0\_5min\_100%  
 Processing Method: Processing  
 Channel Name: W2489 ChB  
 Proc. Chnl. Descr.: W2489 ChB 254nm

Date Acquired: 2024.04.26. 12:53:45 EET  
 Date Processed: 2024.04.26. 13:34:37 EET

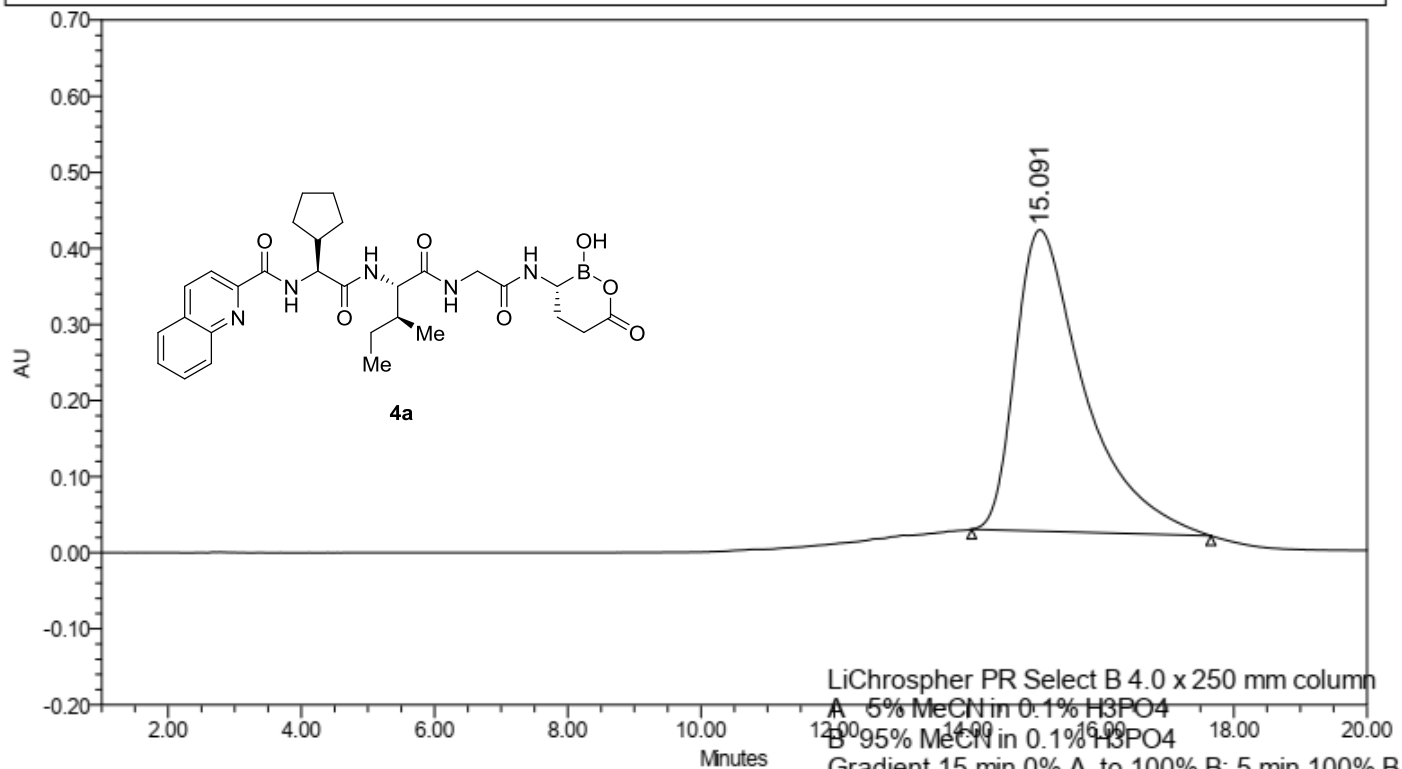

LiChrospher PR Select B 4.0 x 250 mm column  
 A 5% MeCN in 0.1% H<sub>3</sub>PO<sub>4</sub>  
 B 95% MeCN in 0.1% H<sub>3</sub>PO<sub>4</sub>  
 Gradient 15 min 0% A to 100% B; 5 min 100% B  
 Column Temperature 40oC  
 Flow Rate: 1.0 ml/min

|   | RT     | Area     | % Area | Height |
|---|--------|----------|--------|--------|
| 1 | 15.091 | 28469907 | 100.00 | 395971 |

Reported by User: Olita  
 Report Method: Default Individual Report  
 Report Method ID 12125  
 Page: 1 of 1

Project Name: Martins  
 Date Printed: 2024.04.26.  
 13:36:48 Europe/Riga

## SAMPLE INFORMATION

|                                                                                                                                                                                                                                  |                                                                                                                                                                                         |
|----------------------------------------------------------------------------------------------------------------------------------------------------------------------------------------------------------------------------------|-----------------------------------------------------------------------------------------------------------------------------------------------------------------------------------------|
| Sample Name: osm-EP_1913<br>Sample Type: Unknown<br>Vial: 2<br>Injection #: 1<br>Injection Volume: 30.00 ul<br>Run Time: 20.0 Minutes<br><br>Date Acquired: 2024.04.26. 10:44:42 EET<br>Date Processed: 2024.04.26. 13:32:01 EET | Acquired By: Olita<br>Sample Set Name: 26042024<br>Acq. Method Set: MeCN_0_5min_100%<br>Processing Method: Processing<br>Channel Name: W2489 ChA<br>Proc. Chnl. Descr.: W2489 ChA 210nm |
|----------------------------------------------------------------------------------------------------------------------------------------------------------------------------------------------------------------------------------|-----------------------------------------------------------------------------------------------------------------------------------------------------------------------------------------|

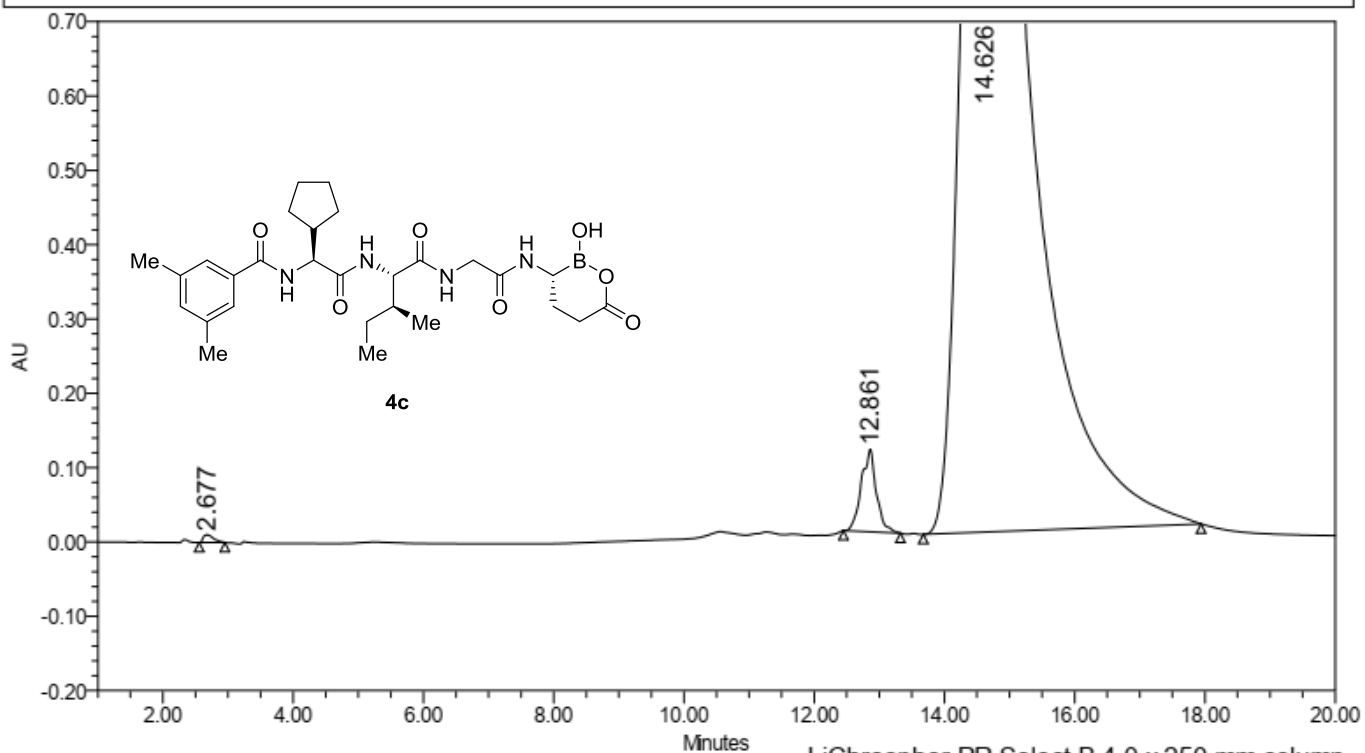

LiChrospher PR Select B 4.0 x 250 mm column  
 A 5% MeCN in 0.1% H<sub>3</sub>PO<sub>4</sub>  
 B 95% MeCN in 0.1% H<sub>3</sub>PO<sub>4</sub>  
 Gradient 15 min 0% A to 100% B; 5 min 100% B  
 Column Temperature 40°C  
 Flow Rate: 1.0 ml/min

| RT | Area     | % Area | Height  |
|----|----------|--------|---------|
| 1  | 112442   | 0.11   | 10184   |
| 2  | 1778266  | 1.76   | 110924  |
| 3  | 99338490 | 98.13  | 1527402 |

Reported by User: Olita  
 Report Method: Default Individual Report  
 Report Method ID 12125  
 Page: 1 of 1

Project Name: Martins  
 Date Printed:  
 2024.04.26.  
 13:36:11 Europe/Riga

## SAMPLE INFORMATION

|                            |                                     |
|----------------------------|-------------------------------------|
| Sample Name: osm-EP_1913   | Acquired By: Olita                  |
| Sample Type: Unknown       | Sample Set Name: 26042024           |
| Vial: 2                    | Acq. Method Set: MeCN_0_5min_100%   |
| Injection #: 1             | Processing Method: Processing       |
| Injection Volume: 30.00 ul | Channel Name: W2489 ChB             |
| Run Time: 20.0 Minutes     | Proc. Chnl. Descr.: W2489 ChB 254nm |

Date Acquired: 2024.04.26. 10:44:42 EET  
 Date Processed: 2024.04.26. 13:27:48 EET

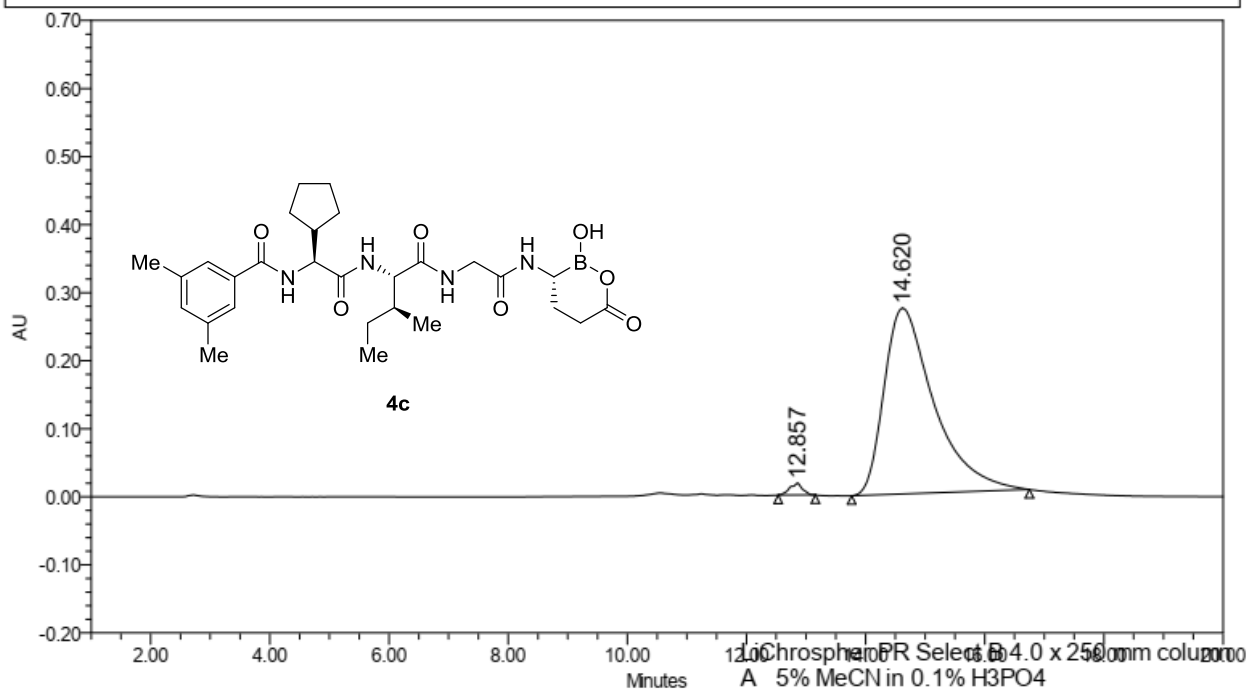

|   | RT     | Area     | % Area | Height |
|---|--------|----------|--------|--------|
| 1 | 12.857 | 253479   | 1.57   | 17289  |
| 2 | 14.620 | 15915867 | 98.43  | 273005 |

Chromatogram PR Select 64.0 x 250 mm column  
 A 5% MeCN in 0.1% H3PO4  
 B 95% MeCN in 0.1% H3PO4  
 Gradient 15 min 0% A to 100% B; 5 min 100% B  
 Column Temperature 40oC  
 Flow Rate: 1.0 ml/min

Reported by User: Olita  
 Report Method: Default Individual Report  
 Report Method ID 12125  
 Page: 1 of 1

Project Name: Martins  
 Date Printed:  
 2024.04.26.  
 13:28:39 Europe/Riga
